# Supplementary material for: Synthesis of homophthalimide spironaphthalenones through [5 + 1] spiroannulation of aryl/alkenyl enaminones with diazo homophthalimides
Source: Royal Society of Chemistry journal article supplement (doi:10.1039/d3qo00939d), 2023-01-01
Supplement: d3qo00939d1.pdf [file d3qo00939d1.pdf]

## Supporting Information

### **Synthesis of Homophthalimide Spiroanthalones through [5 + 1] Spiroannulation of Aryl/Alkenyl Enaminones with Diazo Homophthalimides**

Chun Yang, Xinying Zhang\*, Xuesen Fan\*

*Pingyuan Laboratory, Collaborative Innovation Center of Henan Province for Green*

*Manufacturing of Fine Chemicals, Key Laboratory of Green Chemical Media and Reactions,*

*Ministry of Education, School of Chemistry and Chemical Engineering, Henan Normal University,*

*Xinxiang, Henan 453007, P. R. China*

*E-mail: xinyingzhang@htu.cn; xuesen.fan@htu.cn*

## Table of Contents

|             |                                                |         |
|-------------|------------------------------------------------|---------|
| <b>I</b>    | General experimental information               | S3      |
| <b>II</b>   | Experimental procedures and spectroscopic data | S4-S19  |
| <b>III</b>  | Structural elaborations                        | S20-S23 |
| <b>IV</b>   | Mechanism studies                              | S24-S29 |
| <b>V</b>    | X-Ray crystal structure and data of <b>3aa</b> | S30-S31 |
| <b>VI</b>   | Copies of NMR spectra of <b>3aa-3ap</b>        | S32-S73 |
| <b>VII</b>  | Copies of NMR spectra of <b>4-7</b>            | S74-S77 |
| <b>VIII</b> | References                                     | S78     |

## I. General experimental information

All reagents were purchased from commercial sources and were used without further purification. Aryl/alkenyl enaminones (**1**)<sup>1,2</sup>, diazo homophthalimides (**2**)<sup>3,4</sup> and [RhCp\*Cl<sub>2</sub>]<sub>2</sub> were prepared based on literature procedures. Melting points were recorded with a micro melting point apparatus and uncorrected. The <sup>1</sup>H NMR spectra were recorded at 400 MHz or 600 MHz. The <sup>13</sup>C NMR spectra were recorded at 100 MHz or 150 MHz. The <sup>19</sup>F NMR spectra were recorded at 376 MHz. Chemical shifts were expressed in parts per million ( $\delta$ ), and were reported as s (singlet), d (doublet), t (triplet), dd (doublet of doublets), m (multiplet), etc. The coupling constants *J* were given in Hz. High resolution mass spectra (HRMS) were obtained *via* ESI mode by using a MicrOTOF mass spectrometer. All reactions were monitored by thin layer chromatography (TLC) using silica gel plates (silica gel 60 F254 0.25 mm), and components were visualized by observation under UV light (254 and 365 nm).

## II. Experimental procedures and spectroscopic data

### 1. Typical procedure for the synthesis of 3aa and spectroscopic data of 3aa-3ap

To a reaction tube equipped with a stir bar were added (*E*)-3-(dimethylamino)-1-phenylprop-2-en-1-one (**1a**, 35.0 mg, 0.2 mmol), [RhCp\*Cl<sub>2</sub>]<sub>2</sub> (5.0 mg, 0.008 mmol), AgNTf<sub>2</sub> (31.1 mg, 0.08 mmol), 4-diazo-2-methylisoquinoline-1,3(2*H*,4*H*)-dione (**2a**, 80.4 mg, 0.4 mmol) and DCE (2 mL). The tube was then sealed, and the mixture was stirred at 60 °C (oil bath) under air for 12 h. Upon completion, it was cooled to room temperature, filtered through a pad of celite and concentrated under reduced pressure. The residue was purified by silica gel column chromatography using petroleum ether/ethyl acetate (8:1) as eluent to afford **3aa**. Other products **3ba-3ap** were obtained in a similar manner.

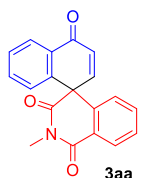

### 2-Methyl-1*H*,4'*H*-spiro[isoquinoline-4,1'-naphthalene]-1,3,4'(2*H*)-trione (**3aa**)

Eluent: petroleum ether/ethyl acetate (8:1). White solid (49.1 mg, 81%), mp 215.1-216.6 °C. <sup>1</sup>H NMR (600 MHz, CDCl<sub>3</sub>): δ 8.38-8.36 (m, 1H), 8.27-8.26 (m, 1H), 7.54-7.51 (m, 2H), 7.48-7.43 (m, 2H), 6.93-6.91 (m, 1H), 6.86-6.85 (m, 1H), 6.83 (d, *J* = 9.6 Hz, 1H), 6.69 (d, *J* = 9.6 Hz, 1H), 3.43 (s, 3H). <sup>13</sup>C{<sup>1</sup>H} NMR (150 MHz, CDCl<sub>3</sub>): δ 184.0, 169.8, 164.0, 145.2, 142.8, 138.7, 134.7, 133.4, 131.5, 129.7, 129.4, 128.9, 128.7, 128.3, 127.9, 127.3, 124.4, 54.3, 28.0. HRMS (ESI) *m/z*: [M+Na]<sup>+</sup> Calcd for C<sub>19</sub>H<sub>13</sub>NNaO<sub>3</sub> 326.0788; Found 326.0786.

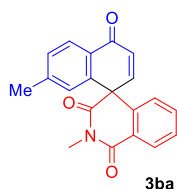

### 2,7'-Dimethyl-1*H*,4'*H*-spiro[isoquinoline-4,1'-naphthalene]-1,3,4'(2*H*)-trione (**3ba**)

Eluent: petroleum ether/ethyl acetate (9:1). Yellow solid (50.1 mg, 79%), mp 227.9-229.6 °C. <sup>1</sup>H NMR (400 MHz, CDCl<sub>3</sub>): δ 8.39-8.36 (m, 1H), 8.17 (d, *J* = 8.0 Hz, 1H), 7.53-7.51 (m, 2H), 7.28-7.26 (m, 1H),

6.91-6.89 (m, 1H), 6.76 (d,  $J = 10.0$  Hz, 1H), 6.65 (d,  $J = 10.0$  Hz, 1H), 6.60 (s, 1H), 3.45 (s, 3H), 2.26 (s, 3H).  $^{13}\text{C}\{^1\text{H}\}$  NMR (100 MHz,  $\text{CDCl}_3$ ):  $\delta$  183.9, 170.0, 164.0, 144.9, 144.5, 143.0, 138.9, 134.7, 129.9, 129.6, 129.4, 129.3, 128.8, 128.3, 128.1, 127.3, 124.3, 54.2, 28.0, 21.8. HRMS (ESI)  $m/z$ :  $[\text{M}+\text{Na}]^+$  Calcd for  $\text{C}_{20}\text{H}_{15}\text{NNaO}_3$  340.0944; Found 340.0944.

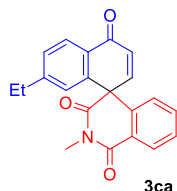

### 7'-Ethyl-2-methyl-1*H*,4'*H*-spiro[isoquinoline-4,1'-naphthalene]-1,3,4'(2*H*)-trione (3ca)

Eluent: petroleum ether/ethyl acetate (8:1). Yellow solid (50.3 mg, 76%), mp 185.4-187.2 °C.  $^1\text{H}$  NMR (400 MHz,  $\text{CDCl}_3$ ):  $\delta$  8.39-8.36 (m, 1H), 8.19 (d,  $J = 8.4$  Hz, 1H), 7.54-7.50 (m, 2H), 7.31 (d,  $J = 8.0$  Hz, 1H), 6.91-6.89 (m, 1H), 6.77 (d,  $J = 10.0$  Hz, 1H), 6.65 (d,  $J = 10.0$  Hz, 1H), 6.60 (s, 1H), 3.45 (s, 3H), 2.55 (q,  $J = 7.6$  Hz, 2H), 1.10 (t,  $J = 7.6$  Hz, 3H).  $^{13}\text{C}\{^1\text{H}\}$  NMR (100 MHz,  $\text{CDCl}_3$ ):  $\delta$  183.9, 170.0, 164.1, 150.5, 144.9, 143.0, 139.0, 134.7, 129.7, 129.5, 129.4, 128.8, 128.5, 128.3, 127.4, 127.0, 124.4, 54.3, 28.9, 28.0, 14.9. HRMS (ESI)  $m/z$ :  $[\text{M}+\text{Na}]^+$  Calcd for  $\text{C}_{21}\text{H}_{17}\text{NNaO}_3$  354.1101; Found 354.1101.

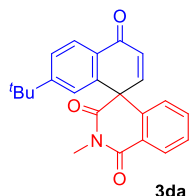

### 7'-(*tert*-Butyl)-2-methyl-1*H*,4'*H*-spiro[isoquinoline-4,1'-naphthalene]-1,3,4'(2*H*)-trione (3da)

Eluent: petroleum ether/ethyl acetate (10:1). White solid (41.6 mg, 58%), mp 164.2-165.8 °C.  $^1\text{H}$  NMR (400 MHz,  $\text{CDCl}_3$ ):  $\delta$  8.39-8.37 (m, 1H), 8.19 (d,  $J = 8.4$  Hz, 1H), 7.54-7.49 (m, 3H), 6.92-6.90 (m, 1H), 6.80-6.78 (m, 2H), 6.67 (d,  $J = 10.0$  Hz, 1H), 3.45 (s, 3H), 1.15 (s, 9H).  $^{13}\text{C}\{^1\text{H}\}$  NMR (100 MHz,  $\text{CDCl}_3$ ):  $\delta$  183.9, 170.1, 164.1, 157.3, 145.0, 142.5, 139.0, 134.6, 129.9, 129.4, 129.2, 128.8, 128.1, 127.1, 126.1, 124.4, 124.3, 54.5, 35.1, 30.9, 28.0. HRMS (ESI)  $m/z$ :  $[\text{M}+\text{Na}]^+$  Calcd for  $\text{C}_{23}\text{H}_{21}\text{NNaO}_3$  382.1414; Found 382.1414.

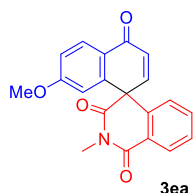

**7'-Methoxy-2-methyl-1*H*,4'*H*-spiro[isoquinoline-4,1'-naphthalene]-1,3,4'(2*H*)-trione (3ea)**

Eluent: petroleum ether/ethyl acetate (6:1). Yellow solid (48.0 mg, 72%), mp 182.8-184.6 °C. <sup>1</sup>H NMR (400 MHz, CDCl<sub>3</sub>): δ 8.37-8.35 (m, 1H), 8.25 (d, *J* = 8.8 Hz, 1H), 7.53-7.51 (m, 2H), 6.99 (dd, *J*<sub>1</sub> = 8.8 Hz, *J*<sub>2</sub> = 2.4 Hz, 1H), 6.93-6.91 (m, 1H), 6.74 (d, *J* = 10.0 Hz, 1H), 6.63 (d, *J* = 10.0 Hz, 1H), 6.26 (d, *J* = 2.4 Hz, 1H), 3.72 (s, 3H), 3.44 (s, 3H). <sup>13</sup>C{<sup>1</sup>H} NMR (100 MHz, CDCl<sub>3</sub>): δ 183.2, 169.9, 164.0, 163.3, 144.9, 144.4, 138.9, 134.7, 129.8, 129.7, 129.4, 128.9, 128.2, 125.1, 124.3, 114.2, 113.2, 55.5, 54.3, 28.0. HRMS (ESI) *m/z*: [M+Na]<sup>+</sup> Calcd for C<sub>20</sub>H<sub>15</sub>NNaO<sub>4</sub> 356.0893; Found 356.0893.

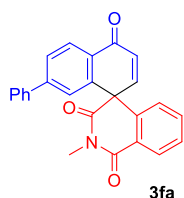

**2-Methyl-7'-phenyl-1*H*,4'*H*-spiro[isoquinoline-4,1'-naphthalene]-1,3,4'(2*H*)-trione (3fa)**

Eluent: petroleum ether/ethyl acetate (4:1). Yellow solid (54.6 mg, 72%), mp 196.2-197.5 °C. <sup>1</sup>H NMR (400 MHz, CDCl<sub>3</sub>): δ 8.40-8.37 (m, 1H), 8.34 (d, *J* = 8.4 Hz, 1H), 7.70 (dd, *J*<sub>1</sub> = 8.4 Hz, *J*<sub>2</sub> = 1.6 Hz, 1H), 7.56-7.52 (m, 2H), 7.39-7.35 (m, 5H), 6.98-6.95 (m, 2H), 6.82 (d, *J* = 10.0 Hz, 1H), 6.70 (d, *J* = 10.0 Hz, 1H), 3.46 (s, 3H). <sup>13</sup>C{<sup>1</sup>H} NMR (100 MHz, CDCl<sub>3</sub>): δ 183.8, 169.9, 164.0, 146.3, 145.2, 143.4, 139.2, 138.8, 134.8, 130.4, 129.7, 129.5, 129.0, 128.9, 128.6, 128.3, 127.9, 127.6, 127.3, 126.4, 124.4, 54.5, 28.1. HRMS (ESI) *m/z*: [M+Na]<sup>+</sup> Calcd for C<sub>25</sub>H<sub>17</sub>NNaO<sub>3</sub> 402.1101; Found 402.1099.

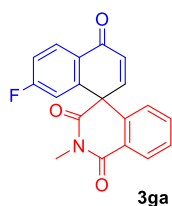

**7'-Fluoro-2-methyl-1*H*,4'*H*-spiro[isoquinoline-4,1'-naphthalene]-1,3,4'(2*H*)-trione (3ga)**

Eluent: petroleum ether/ethyl acetate (8:1). Yellow solid (39.8 mg, 62%), mp 203.3-204.7 °C. <sup>1</sup>H NMR (600 MHz, CDCl<sub>3</sub>): δ 8.39-8.38 (m, 1H), 8.31 (dd, *J*<sub>1</sub> = 8.4 Hz, *J*<sub>2</sub> = 5.4 Hz, 1H), 7.56-7.55 (m, 2H), 7.17 (td, *J*<sub>1</sub> = 8.4 Hz, *J*<sub>2</sub> = 2.4 Hz, 1H), 6.92-6.90 (m, 1H), 6.80 (d, *J* = 10.2 Hz, 1H), 6.67 (d, *J* = 10.2 Hz, 1H), 6.51 (dd, *J*<sub>1</sub> = 9.0 Hz, *J*<sub>2</sub> = 2.4 Hz, 1H), 3.44 (s, 3H). <sup>13</sup>C{<sup>1</sup>H} NMR (150 MHz, CDCl<sub>3</sub>): δ 182.7, 169.3, 165.4 (d, <sup>1</sup>*J*<sub>C-F</sub> = 254.9 Hz), 163.7, 145.4 (d, <sup>3</sup>*J*<sub>C-F</sub> = 8.7 Hz), 145.0, 138.1, 134.9, 130.4 (d, <sup>3</sup>*J*<sub>C-F</sub> = 9.8 Hz), 129.7, 129.5, 129.2, 128.3 (d, <sup>4</sup>*J*<sub>C-F</sub> = 3.3 Hz), 128.2, 124.3, 116.7 (d, <sup>2</sup>*J*<sub>C-F</sub> = 21.9 Hz), 114.6 (d, <sup>2</sup>*J*<sub>C-F</sub> = 23.0 Hz), 54.4 (d, <sup>4</sup>*J*<sub>C-F</sub> = 2.1 Hz), 28.1. <sup>19</sup>F NMR (376 MHz, CDCl<sub>3</sub>): δ -103.07 - -103.13 (m). HRMS (ESI) *m/z*: [M+Na]<sup>+</sup> Calcd for C<sub>19</sub>H<sub>12</sub>FNNaO<sub>3</sub> 344.0693; Found 344.0693.

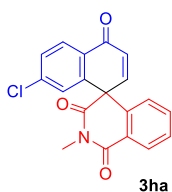

#### 7'-Chloro-2-methyl-1*H*,4'*H*-spiro[isoquinoline-4,1'-naphthalene]-1,3,4'(2*H*)-trione (3ha)

Eluent: petroleum ether/ethyl acetate (6:1). Yellow solid (36.4 mg, 54%), mp 223.4-224.9 °C. <sup>1</sup>H NMR (400 MHz, CDCl<sub>3</sub>): δ 8.40-8.38 (m, 1H), 8.22 (d, *J* = 8.4 Hz, 1H), 7.57-7.55 (m, 2H), 7.45 (dd, *J*<sub>1</sub> = 8.4 Hz, *J*<sub>2</sub> = 1.6 Hz, 1H), 6.90-6.88 (m, 1H), 6.80-6.76 (m, 2H), 6.66 (d, *J* = 10.0 Hz, 1H), 3.45 (s, 3H). <sup>13</sup>C{<sup>1</sup>H} NMR (100 MHz, CDCl<sub>3</sub>): δ 183.0, 169.3, 163.7, 145.1, 144.3, 139.9, 138.0, 134.9, 130.1, 129.7, 129.4, 129.2, 128.9, 128.2, 127.9, 124.4, 54.2, 28.2. HRMS (ESI) *m/z*: [M+Na]<sup>+</sup> Calcd for C<sub>19</sub>H<sub>12</sub>ClNNaO<sub>3</sub> 360.0398; Found 360.0399.

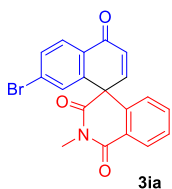

#### 7'-Bromo-2-methyl-1*H*,4'*H*-spiro[isoquinoline-4,1'-naphthalene]-1,3,4'(2*H*)-trione (3ia)

Eluent: petroleum ether/ethyl acetate (8:1). Yellow solid (51.8 mg, 68%), mp 242.5-244.3 °C. <sup>1</sup>H NMR (400 MHz, CDCl<sub>3</sub>): δ 8.40-8.38 (m, 1H), 8.14 (d, *J* = 8.4 Hz, 1H), 7.61 (dd, *J*<sub>1</sub> = 8.4 Hz, *J*<sub>2</sub> = 1.6 Hz, 1H), 7.57-7.55 (m, 2H), 6.96 (d, *J* = 2.0 Hz, 1H), 6.90-6.88 (m, 1H), 6.76 (d, *J* = 10.0 Hz, 1H), 6.65 (d, *J* = 10.0

Hz, 1H), 3.45 (s, 3H).  $^{13}\text{C}\{^1\text{H}\}$  NMR (100 MHz,  $\text{CDCl}_3$ ):  $\delta$  183.1, 169.3, 163.7, 145.1, 144.4, 138.0, 134.9, 132.3, 130.9, 130.6, 129.7, 129.3, 129.2, 128.9, 128.6, 128.3, 124.4, 54.2, 28.2. HRMS (ESI)  $m/z$ :  $[\text{M}+\text{Na}]^+$  Calcd for  $\text{C}_{19}\text{H}_{12}\text{BrNNaO}_3$  403.9893; Found 403.9893.

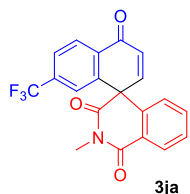

### 2-Methyl-7'-(trifluoromethyl)-1H,4'H-spiro[isoquinoline-4,1'-naphthalene]-1,3,4'(2H)-trione (3ja)

Eluent: petroleum ether/ethyl acetate (9:1). Yellow solid (48.2 mg, 65%), mp 172.1-173.8 °C.  $^1\text{H}$  NMR (400 MHz,  $\text{CDCl}_3$ ):  $\delta$  8.42-8.40 (m, 2H), 7.74 (d,  $J = 8.4$  Hz, 1H), 7.58-7.55 (m, 2H), 7.07 (s, 1H), 6.86-6.83 (m, 2H), 6.69 (d,  $J = 10.0$  Hz, 1H), 3.45 (s, 3H).  $^{13}\text{C}\{^1\text{H}\}$  NMR (100 MHz,  $\text{CDCl}_3$ ):  $\delta$  182.8, 169.2, 163.6, 145.9, 143.3, 137.7, 135.0, 134.5 (q,  $^2J_{\text{C-F}} = 26.7$  Hz), 129.9, 129.4, 129.2, 128.2, 128.1, 125.6 (q,  $^3J_{\text{C-F}} = 3.6$  Hz), 125.1 (q,  $^3J_{\text{C-F}} = 3.6$  Hz), 124.5, 123.1 (q,  $^1J_{\text{C-F}} = 271.6$  Hz), 54.6, 28.2.  $^{19}\text{F}$  NMR (376 MHz,  $\text{CDCl}_3$ ):  $\delta$  -63.06 (s). HRMS (ESI)  $m/z$ :  $[\text{M}+\text{Na}]^+$  Calcd for  $\text{C}_{20}\text{H}_{12}\text{F}_3\text{NNaO}_3$  394.0661; Found 394.0661.

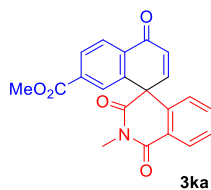

### Methyl 2-methyl-1,3,4'-trioxo-2,3-dihydro-1H,4'H-spiro[isoquinoline-4,1'-naphthalene]-7'-carboxylate (3ka)

Eluent: petroleum ether/ethyl acetate (7:1). White solid (36.8 mg, 51%), mp 213.3-215.1 °C.  $^1\text{H}$  NMR (400 MHz,  $\text{CDCl}_3$ ):  $\delta$  8.41-8.39 (m, 1H), 8.35 (d,  $J = 8.4$  Hz, 1H), 8.12 (dd,  $J_1 = 8.4$  Hz,  $J_2 = 1.6$  Hz, 1H), 7.55-7.52 (m, 2H), 7.49 (d,  $J = 1.6$  Hz, 1H), 6.85-6.81 (m, 2H), 6.68 (d,  $J = 10.0$  Hz, 1H), 3.85 (s, 3H), 3.45 (s, 3H).  $^{13}\text{C}\{^1\text{H}\}$  NMR (100 MHz,  $\text{CDCl}_3$ ):  $\delta$  183.3, 169.5, 165.5, 163.7, 145.9, 142.9, 138.1, 134.8, 134.7, 134.3, 129.7, 129.5, 129.4, 129.3, 129.2, 128.2, 127.5, 124.5, 54.6, 52.6, 28.2. HRMS (ESI)  $m/z$ :  $[\text{M}+\text{Na}]^+$  Calcd for  $\text{C}_{21}\text{H}_{15}\text{NNaO}_5$  384.0842; Found 384.0837.



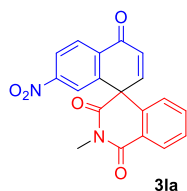

**2-Methyl-7'-nitro-1*H*,4'*H*-spiro[isoquinoline-4,1'-naphthalene]-1,3,4'(2*H*)-trione (3la)**

Eluent: petroleum ether/ethyl acetate (5:1). Brown solid (31.3 mg, 45%), mp 197.2-198.7 °C. <sup>1</sup>H NMR (400 MHz, CDCl<sub>3</sub>): δ 8.48-8.42 (m, 2H), 8.31 (dd, *J*<sub>1</sub> = 8.4 Hz, *J*<sub>2</sub> = 2.0 Hz, 1H), 7.69 (d, *J* = 2.0 Hz, 1H), 7.62-7.55 (m, 2H), 6.89 (d, *J* = 10.0 Hz, 1H), 6.86-6.84 (m, 1H), 6.71 (d, *J* = 10.0 Hz, 1H), 3.46 (s, 3H). <sup>13</sup>C{<sup>1</sup>H} NMR (100 MHz, CDCl<sub>3</sub>): δ 182.2, 168.9, 163.3, 150.3, 146.3, 144.1, 137.2, 135.9, 135.0, 130.1, 129.6, 129.2, 129.0, 128.1, 124.6, 123.6, 123.5, 54.8, 28.3. HRMS (ESI) *m/z*: [M+Na]<sup>+</sup> Calcd for C<sub>19</sub>H<sub>12</sub>N<sub>2</sub>NaO<sub>5</sub> 371.0638; Found 371.0637.

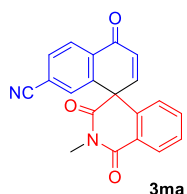

**2-Methyl-1,3,4'-trioxo-2,3-dihydro-1*H*,4'*H*-spiro[isoquinoline-4,1'-naphthalene]-7'-carbonitrile (3ma)**

Eluent: petroleum ether/ethyl acetate (5:1). White solid (38.7 mg, 59%), mp 237.6-239.2 °C. <sup>1</sup>H NMR (400 MHz, CDCl<sub>3</sub>): δ 8.44-8.41 (m, 1H), 8.38 (d, *J* = 8.4 Hz, 1H), 7.75 (dd, *J*<sub>1</sub> = 8.4 Hz, *J*<sub>2</sub> = 0.8 Hz, 1H), 7.60-7.57 (m, 2H), 7.14 (s, 1H), 6.87-6.85 (m, 2H), 6.72 (d, *J* = 10.0 Hz, 1H), 3.45 (s, 3H). <sup>13</sup>C{<sup>1</sup>H} NMR (100 MHz, CDCl<sub>3</sub>): δ 182.4, 168.8, 163.3, 145.7, 143.6, 137.3, 135.1, 134.5, 132.2, 131.8, 130.0, 129.6, 129.4, 128.1, 128.0, 124.5, 117.3, 116.8, 54.2, 28.3. HRMS (ESI) *m/z*: [M+Na]<sup>+</sup> Calcd for C<sub>20</sub>H<sub>12</sub>N<sub>2</sub>NaO<sub>3</sub> 351.0740; Found 351.0740.

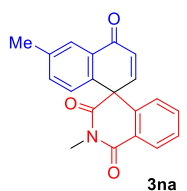

**2,6'-Dimethyl-1*H*,4'*H*-spiro[isoquinoline-4,1'-naphthalene]-1,3,4'(2*H*)-trione (3na)**

Eluent: petroleum ether/ethyl acetate (7:1). White solid (31.1 mg, 49%), mp 248.6-250.2 °C.  $^1\text{H}$  NMR (400 MHz,  $\text{CDCl}_3$ ):  $\delta$  8.37-8.35 (m, 1H), 8.08 (s, 1H), 7.52-7.50 (m, 2H), 7.27-7.25 (m, 1H), 6.92-6.90 (m, 1H), 6.80 (d,  $J = 10.0$  Hz, 1H), 6.73 (d,  $J = 8.0$  Hz, 1H), 6.68 (d,  $J = 10.0$  Hz, 1H), 3.43 (s, 3H), 2.40 (s, 3H).  $^{13}\text{C}\{^1\text{H}\}$  NMR (100 MHz,  $\text{CDCl}_3$ ):  $\delta$  184.2, 170.0, 164.0, 145.1, 140.1, 138.9, 138.8, 134.6, 134.4, 131.2, 129.9, 129.4, 128.8, 128.2, 127.7, 127.4, 124.4, 54.1, 28.0, 21.1. HRMS (ESI)  $m/z$ :  $[\text{M}+\text{Na}]^+$  Calcd for  $\text{C}_{20}\text{H}_{15}\text{NNaO}_3$  340.0944; Found 340.0945.

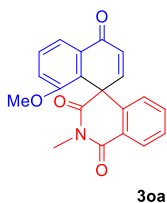

**8'-Methoxy-2-methyl-1*H*,4'*H*-spiro[isoquinoline-4,1'-naphthalene]-1,3,4'(2*H*)-trione (3oa)**

Eluent: petroleum ether/ethyl acetate (5:1). White solid (30.6 mg, 46%), mp 204.6-206.3 °C.  $^1\text{H}$  NMR (400 MHz,  $\text{CDCl}_3$ ):  $\delta$  8.31 (dd,  $J_1 = 7.6$  Hz,  $J_2 = 2.0$  Hz, 1H), 7.93 (d,  $J = 8.0$  Hz, 1H), 7.51 (t,  $J = 8.0$  Hz, 1H), 7.46-7.39 (m, 2H), 7.03 (d,  $J = 8.0$  Hz, 1H), 6.76-6.72 (m, 1H), 6.69 (d,  $J = 10.0$  Hz, 1H), 6.52 (d,  $J = 10.0$  Hz, 1H), 3.48 (s, 3H), 3.47 (s, 3H).  $^{13}\text{C}\{^1\text{H}\}$  NMR (100 MHz,  $\text{CDCl}_3$ ):  $\delta$  184.1, 170.8, 164.4, 155.4, 145.6, 138.4, 134.0, 133.0, 132.3, 129.7, 129.1, 128.1, 127.8, 126.4, 124.8, 119.1, 116.0, 56.0, 52.3, 27.7. HRMS (ESI)  $m/z$ :  $[\text{M}+\text{Na}]^+$  Calcd for  $\text{C}_{20}\text{H}_{15}\text{NNaO}_4$  356.0893; Found 356.0894.

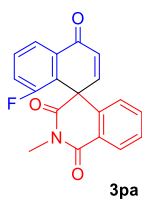

**8'-Fluoro-2-methyl-1*H*,4'*H*-spiro[isoquinoline-4,1'-naphthalene]-1,3,4'(2*H*)-trione (3pa)**

Eluent: petroleum ether/ethyl acetate (7:1). Yellow solid (27.0 mg, 42%), mp 221.3-222.7 °C.  $^1\text{H}$  NMR (600 MHz,  $\text{CDCl}_3$ ):  $\delta$  8.35-8.34 (m, 1H), 8.13 (d,  $J = 7.8$  Hz, 1H), 7.55 (td,  $J_1 = 8.4$  Hz,  $J_2 = 5.4$  Hz, 1H), 7.52-7.47 (m, 2H), 7.23 (t,  $J = 9.0$  Hz, 1H), 6.80-6.78 (m, 1H), 6.72 (d,  $J = 10.2$  Hz, 1H), 6.55 (d,  $J = 10.2$  Hz, 1H), 3.48 (s, 3H).  $^{13}\text{C}\{^1\text{H}\}$  NMR (150 MHz,  $\text{CDCl}_3$ ):  $\delta$  182.7 (d,  $^4J_{\text{C-F}} = 3.3$  Hz), 169.7, 163.8, 159.0 (d,  $^1J_{\text{C-F}} = 249.3$  Hz), 145.2, 137.2, 134.4, 133.4 (d,  $^4J_{\text{C-F}} = 2.3$  Hz), 130.6 (d,  $^2J_{\text{C-F}} = 13.1$  Hz), 130.3 (d,  $^3J_{\text{C-F}} =$

8.9 Hz), 129.7, 128.8, 128.0, 126.8, 124.4, 122.8 (d,  $^4J_{C-F} = 3.3$  Hz), 120.4 (d,  $^2J_{C-F} = 20.7$  Hz), 51.7, 28.0.  $^{19}\text{F}$  NMR (376 MHz,  $\text{CDCl}_3$ ):  $\delta$  -112.90 (dd,  $J_1 = 9.8$  Hz,  $J_2 = 5.6$  Hz). HRMS (ESI)  $m/z$ :  $[\text{M}+\text{Na}]^+$  Calcd for  $\text{C}_{19}\text{H}_{12}\text{FNNaO}_3$  344.0693; Found 344.0693.

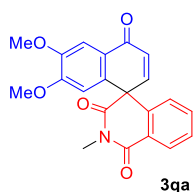

**6',7'-Dimethoxy-2-methyl-1*H*,4'*H*-spiro[isoquinoline-4,1'-naphthalene]-1,3,4'(2*H*)-trione (3qa)**

Eluent: petroleum ether/ethyl acetate (6:1). White solid (37.1 mg, 51%), mp 231.6-233.5 °C.  $^1\text{H}$  NMR (600 MHz,  $\text{CDCl}_3$ ):  $\delta$  8.37-8.36 (m, 1H), 7.72 (s, 1H), 7.54-7.52 (m, 2H), 6.90-6.89 (m, 1H), 6.74 (d,  $J = 9.6$  Hz, 1H), 6.61 (d,  $J = 9.6$  Hz, 1H), 6.15 (s, 1H), 3.98 (s, 3H), 3.68 (s, 3H), 3.46 (s, 3H).  $^{13}\text{C}\{^1\text{H}\}$  NMR (150 MHz,  $\text{CDCl}_3$ ):  $\delta$  183.3, 170.1, 164.0, 153.6, 149.6, 144.8, 138.9, 137.0, 134.8, 129.5, 129.2, 128.9, 128.1, 125.7, 124.4, 109.1, 108.0, 56.2, 56.1, 54.4, 28.1. HRMS (ESI)  $m/z$ :  $[\text{M}+\text{Na}]^+$  Calcd for  $\text{C}_{21}\text{H}_{17}\text{NNaO}_5$  386.0999; Found 386.0996.

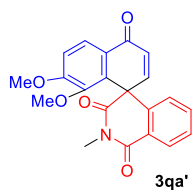

**7',8'-Dimethoxy-2-methyl-1*H*,4'*H*-spiro[isoquinoline-4,1'-naphthalene]-1,3,4'(2*H*)-trione (3qa')**

Eluent: petroleum ether/ethyl acetate (6:1). White solid (13.1 mg, 18%), mp 231.6-233.5 °C.  $^1\text{H}$  NMR (400 MHz,  $\text{CDCl}_3$ ):  $\delta$  8.35-8.33 (m, 1H), 8.08 (d,  $J = 8.8$  Hz, 1H), 7.45-7.43 (m, 2H), 7.11 (d,  $J = 8.8$  Hz, 1H), 6.79-6.77 (m, 1H), 6.64 (d,  $J = 10.0$  Hz, 1H), 6.47 (d,  $J = 10.0$  Hz, 1H), 3.88 (s, 3H), 3.49 (s, 3H), 3.18 (s, 3H).  $^{13}\text{C}\{^1\text{H}\}$  NMR (100 MHz,  $\text{CDCl}_3$ ):  $\delta$  183.4, 170.7, 164.3, 156.6, 150.0, 144.2, 139.1, 137.4, 134.0, 129.3, 128.3, 127.9, 126.9, 125.5, 124.6, 123.6, 112.9, 59.4, 55.8, 52.5, 27.8. HRMS (ESI)  $m/z$ :  $[\text{M}+\text{Na}]^+$  Calcd for  $\text{C}_{21}\text{H}_{17}\text{NNaO}_5$  386.0999; Found 386.0996.

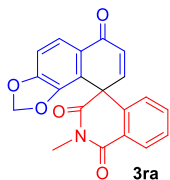

**2-Methyl-1*H*,6'*H*-spiro[isoquinoline-4,9'-naphtho[1,2-*d*][1,3]dioxole]-1,3,6'(2*H*)-trione (3ra)**

Eluent: petroleum ether/ethyl acetate (6:1). Yellow solid (36.1 mg, 52%), mp 214.3-215.9 °C. <sup>1</sup>H NMR (400 MHz, CDCl<sub>3</sub>): δ 8.32-8.30 (m, 1H), 7.93 (d, *J* = 8.0 Hz, 1H), 7.52-7.47 (m, 2H), 6.97 (d, *J* = 8.4 Hz, 1H), 6.94-6.91 (m, 1H), 6.65 (d, *J* = 10.0 Hz, 1H), 6.54 (d, *J* = 10.0 Hz, 1H), 5.88 (d, *J* = 1.2 Hz, 1H), 5.72 (d, *J* = 1.2 Hz, 1H), 3.46 (s, 3H). <sup>13</sup>C{<sup>1</sup>H} NMR (100 MHz, CDCl<sub>3</sub>): δ 182.4, 169.7, 164.1, 151.8, 144.0, 143.9, 137.0, 134.3, 129.2, 129.0, 128.7, 127.4, 125.7, 124.7, 124.3, 123.2, 109.4, 102.6, 51.4, 27.9. HRMS (ESI) *m/z*: [M+Na]<sup>+</sup> Calcd for C<sub>20</sub>H<sub>13</sub>NNaO<sub>5</sub> 370.0686; Found 370.0685.

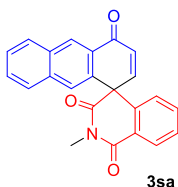

**2'-Methyl-1'*H*,4'*H*-spiro[anthracene-1,4'-isoquinoline]-1',3',4'(2'*H*)-trione (3sa)**

Eluent: petroleum ether/ethyl acetate (6:1). Yellow solid (53.0 mg, 75%), mp 239.6-241.1 °C. <sup>1</sup>H NMR (600 MHz, CDCl<sub>3</sub>): δ 8.50 (s, 1H), 8.43-8.41 (m, 1H), 8.02-8.01 (m, 1H), 7.65-7.64 (m, 1H), 7.55-7.51 (m, 4H), 7.26 (s, 1H), 6.99-6.97 (m, 1H), 6.87 (d, *J* = 10.2 Hz, 1H), 6.79 (d, *J* = 10.2 Hz, 1H), 3.44 (s, 3H). <sup>13</sup>C{<sup>1</sup>H} NMR (150 MHz, CDCl<sub>3</sub>): δ 184.3, 170.3, 164.1, 145.2, 139.8, 138.5, 135.1, 134.8, 132.3, 130.3, 129.8, 129.4, 129.1, 129.0, 128.9, 128.6, 128.5, 127.7, 127.6, 127.4, 124.4, 54.0, 28.1. HRMS (ESI) *m/z*: [M+Na]<sup>+</sup> Calcd for C<sub>23</sub>H<sub>15</sub>NNaO<sub>3</sub> 376.0944; Found 376.0944.

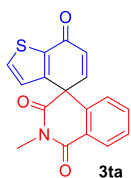

**2'-Methyl-1'*H*,7'*H*-spiro[benzo[*b*]thiophene-4,4'-isoquinoline]-1',3',7'(2'*H*)-trione (3ta)**

Eluent: petroleum ether/ethyl acetate (5:1). Brown solid (26.0 mg, 42%), mp 202.8-204.6 °C.  $^1\text{H}$  NMR (400 MHz,  $\text{CDCl}_3$ ):  $\delta$  8.37-8.34 (m, 1H), 7.63 (d,  $J = 5.2$  Hz, 1H), 7.54-7.52 (m, 2H), 6.93-6.91 (m, 1H), 6.83 (d,  $J = 9.6$  Hz, 1H), 6.65-6.63 (m, 2H), 3.44 (s, 3H).  $^{13}\text{C}\{^1\text{H}\}$  NMR (100 MHz,  $\text{CDCl}_3$ ):  $\delta$  179.1, 168.6, 163.9, 148.5, 145.1, 137.5, 136.6, 134.7, 134.2, 129.8, 129.2, 127.3, 126.2, 124.2, 54.4, 28.1. HRMS (ESI)  $m/z$ :  $[\text{M}+\text{Na}]^+$  Calcd for  $\text{C}_{17}\text{H}_{11}\text{NNaO}_3\text{S}$  332.0352; Found 332.0350.

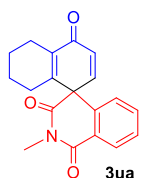

### 2-Methyl-5',6',7',8'-tetrahydro-1H,4'H-spiro[isoquinoline-4,1'-naphthalene]-1,3,4'(2H)-trione (3ua)

Eluent: petroleum ether/ethyl acetate (4:1). White solid (29.5 mg, 48%), mp 183.2-184.6 °C.  $^1\text{H}$  NMR (400 MHz,  $\text{CDCl}_3$ ):  $\delta$  8.32 (d,  $J = 7.2$  Hz, 1H), 7.61 (t,  $J = 7.2$  Hz, 1H), 7.53 (t,  $J = 7.2$  Hz, 1H), 7.08 (d,  $J = 8.0$  Hz, 1H), 6.62 (d,  $J = 9.6$  Hz, 1H), 6.42 (d,  $J = 9.6$  Hz, 1H), 3.44 (s, 3H), 2.50 (br, 2H), 1.94-1.87 (m, 1H), 1.77-1.67 (m, 2H), 1.65-1.60 (m, 2H), 1.54-1.45 (m, 1H).  $^{13}\text{C}\{^1\text{H}\}$  NMR (100 MHz,  $\text{CDCl}_3$ ):  $\delta$  185.4, 169.3, 163.8, 151.3, 145.1, 136.4, 136.1, 134.8, 129.7, 129.0, 128.7, 126.6, 124.9, 56.7, 27.8, 27.5, 22.3, 21.7, 21.5. HRMS (ESI)  $m/z$ :  $[\text{M}+\text{Na}]^+$  Calcd for  $\text{C}_{19}\text{H}_{17}\text{NNaO}_3$  330.1101; Found 330.1101.

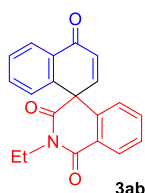

### 2-Ethyl-1H,4'H-spiro[isoquinoline-4,1'-naphthalene]-1,3,4'(2H)-trione (3ab)

Eluent: petroleum ether/ethyl acetate (8:1). White solid (49.5 mg, 78%), mp 163.3-164.5 °C.  $^1\text{H}$  NMR (400 MHz,  $\text{CDCl}_3$ ):  $\delta$  8.38-8.36 (m, 1H), 8.30-8.26 (m, 1H), 7.54-7.49 (m, 2H), 7.48-7.43 (m, 2H), 6.92-6.90 (m, 1H), 6.86-6.82 (m, 2H), 6.71 (d,  $J = 10.0$  Hz, 1H), 4.10 (q,  $J = 7.2$  Hz, 2H), 1.23 (t,  $J = 7.2$  Hz, 3H).  $^{13}\text{C}\{^1\text{H}\}$  NMR (100 MHz,  $\text{CDCl}_3$ ):  $\delta$  184.0, 169.3, 163.5, 145.2, 142.8, 138.7, 134.6, 133.4, 131.4, 129.8, 129.5, 128.8, 128.6, 128.2, 127.7, 127.4, 124.6, 54.2, 36.5, 13.1. HRMS (ESI)  $m/z$ :  $[\text{M}+\text{Na}]^+$  Calcd for  $\text{C}_{20}\text{H}_{15}\text{NNaO}_3$  340.0944; Found 340.0944.

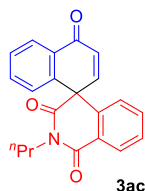

### 2-Propyl-1*H*,4'*H*-spiro[isoquinoline-4,1'-naphthalene]-1,3,4'(2*H*)-trione (3ac)

Eluent: petroleum ether/ethyl acetate (6:1). Yellow solid (48.3 mg, 73%), mp 128.1-129.8 °C.  $^1\text{H}$  NMR (600 MHz,  $\text{CDCl}_3$ ):  $\delta$  8.37-8.36 (m, 1H), 8.28-8.27 (m, 1H), 7.52-7.51 (m, 2H), 7.48-7.43 (m, 2H), 6.91-6.90 (m, 1H), 6.85-6.82 (m, 2H), 6.70 (d,  $J = 9.6$  Hz, 1H), 4.00 (t,  $J = 7.2$  Hz, 2H), 1.68-1.61 (m, 2H), 0.93 (t,  $J = 7.2$  Hz, 3H).  $^{13}\text{C}\{^1\text{H}\}$  NMR (150 MHz,  $\text{CDCl}_3$ ):  $\delta$  184.0, 169.5, 163.7, 145.2, 142.9, 138.7, 134.6, 133.4, 131.5, 129.8, 129.5, 128.8, 128.6, 128.2, 127.7, 127.3, 124.6, 54.3, 42.8, 21.2, 11.3. HRMS (ESI)  $m/z$ :  $[\text{M}+\text{Na}]^+$  Calcd for  $\text{C}_{21}\text{H}_{17}\text{NNaO}_3$  354.1101; Found 354.1101.

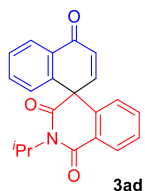

### 2-Isopropyl-1*H*,4'*H*-spiro[isoquinoline-4,1'-naphthalene]-1,3,4'(2*H*)-trione (3ad)

Eluent: petroleum ether/ethyl acetate (6:1). White solid (51.0 mg, 77%), mp 201.6-203.1 °C.  $^1\text{H}$  NMR (400 MHz,  $\text{CDCl}_3$ ):  $\delta$  8.36-8.34 (m, 1H), 8.28-8.26 (m, 1H), 7.52-7.44 (m, 4H), 6.90-6.88 (m, 2H), 6.85 (d,  $J = 10.4$  Hz, 1H), 6.71 (d,  $J = 10.0$  Hz, 1H), 5.24-5.17 (m, 1H), 1.48 (d,  $J = 6.8$  Hz, 3H), 1.42 (d,  $J = 6.8$  Hz, 3H).  $^{13}\text{C}\{^1\text{H}\}$  NMR (100 MHz,  $\text{CDCl}_3$ ):  $\delta$  184.0, 169.8, 164.0, 145.4, 142.7, 138.6, 134.4, 133.3, 131.4, 129.8, 129.6, 128.8, 128.6, 127.9, 127.6, 127.4, 125.1, 54.8, 46.6, 19.7, 19.3. HRMS (ESI)  $m/z$ :  $[\text{M}+\text{Na}]^+$  Calcd for  $\text{C}_{21}\text{H}_{17}\text{NNaO}_3$  354.1101; Found 354.1101.

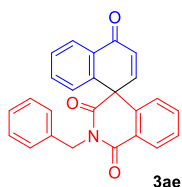

### 2-Benzyl-1*H*,4'*H*-spiro[isoquinoline-4,1'-naphthalene]-1,3,4'(2*H*)-trione (3ae)

Eluent: petroleum ether/ethyl acetate (6:1). White solid (56.9 mg, 75%), mp 176.3-177.6 °C.  $^1\text{H}$  NMR (400 MHz,  $\text{CDCl}_3$ ):  $\delta$  8.37-8.35 (m, 1H), 8.27-8.25 (m, 1H), 7.52-7.35 (m, 6H), 7.29-7.22 (m, 3H), 6.92-6.89 (m, 1H), 6.81-6.75 (m, 2H), 6.69 (d,  $J = 10.0$  Hz, 1H), 5.25 (d,  $J = 14.0$  Hz, 1H), 5.17 (d,  $J = 13.6$  Hz, 1H).  $^{13}\text{C}\{^1\text{H}\}$  NMR (100 MHz,  $\text{CDCl}_3$ ):  $\delta$  183.9, 169.7, 163.6, 145.0, 142.6, 138.7, 136.5, 134.7, 133.3, 131.4, 129.9, 129.6, 129.0, 128.9, 128.7, 128.6, 128.2, 127.8, 127.7, 127.4, 124.5, 54.3, 44.4. HRMS (ESI)  $m/z$ :  $[\text{M}+\text{Na}]^+$  Calcd for  $\text{C}_{25}\text{H}_{17}\text{NNaO}_3$  402.1101; Found 402.1097.

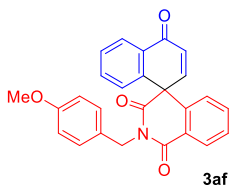

### 2-(4-Methoxybenzyl)-1*H*,4'*H*-spiro[isoquinoline-4,1'-naphthalene]-1,3,4'(2*H*)-trione (3af)

Eluent: petroleum ether/ethyl acetate (6:1). White solid (55.6 mg, 68%), mp 186.4-187.9 °C.  $^1\text{H}$  NMR (400 MHz,  $\text{CDCl}_3$ ):  $\delta$  8.37-8.33 (m, 1H), 8.26 (dd,  $J_1 = 8.0$  Hz,  $J_2 = 1.2$  Hz, 1H), 7.52-7.43 (m, 3H), 7.39-7.34 (m, 3H), 6.91-6.87 (m, 1H), 6.81-6.73 (m, 4H), 6.69 (d,  $J = 10.0$  Hz, 1H), 5.19 (d,  $J = 13.6$  Hz, 1H), 5.10 (d,  $J = 13.2$  Hz, 1H), 3.76 (s, 3H).  $^{13}\text{C}\{^1\text{H}\}$  NMR (100 MHz,  $\text{CDCl}_3$ ):  $\delta$  183.9, 169.7, 163.6, 159.2, 145.1, 142.7, 138.6, 134.7, 133.3, 131.4, 130.7, 129.9, 129.6, 128.8, 128.7, 128.6, 128.2, 127.8, 127.3, 124.6, 113.8, 55.2, 54.3, 43.9. HRMS (ESI)  $m/z$ :  $[\text{M}+\text{Na}]^+$  Calcd for  $\text{C}_{26}\text{H}_{19}\text{NNaO}_4$  432.1206; Found 432.1206.

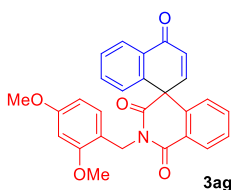

### 2-(2,4-Dimethoxybenzyl)-1*H*,4'*H*-spiro[isoquinoline-4,1'-naphthalene]-1,3,4'(2*H*)-trione (3ag)

Eluent: petroleum ether/ethyl acetate (5:1). White solid (63.2 mg, 72%), mp 195.3-196.9 °C.  $^1\text{H}$  NMR (400 MHz,  $\text{CDCl}_3$ ):  $\delta$  8.36-8.32 (m, 1H), 8.25 (dd,  $J_1 = 7.6$  Hz,  $J_2 = 1.6$  Hz, 1H), 7.51-7.38 (m, 4H), 7.15-7.13 (m, 1H), 6.90-6.82 (m, 3H), 6.67 (d,  $J = 10.0$  Hz, 1H), 6.41-6.38 (m, 2H), 5.18 (s, 2H), 3.76 (s, 3H), 3.65 (s, 3H).  $^{13}\text{C}\{^1\text{H}\}$  NMR (100 MHz,  $\text{CDCl}_3$ ):  $\delta$  184.1, 169.2, 163.7, 160.4, 158.4, 145.5, 142.8, 138.8, 134.5, 133.2,

131.5, 130.4, 129.6, 129.5, 128.8, 128.5, 128.2, 128.1, 127.2, 124.8, 116.8, 104.0, 98.4, 55.4, 55.3, 54.6,

40.1. HRMS (ESI) m/z:  $[M+Na]^+$  Calcd for  $C_{27}H_{21}NNaO_5$  462.1312; Found 462.1312.

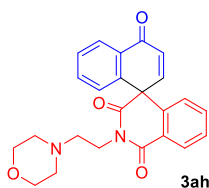

### 2-(2-Morpholinoethyl)-1*H*,4'*H*-spiro[isoquinoline-4,1'-naphthalene]-1,3,4'(2*H*)-trione (3ah)

Eluent: petroleum ether/ethyl acetate (2:1). Brown oil (37.0 mg, 46%), mp 180.5-182.4 °C.  $^1H$  NMR (400 MHz,  $CDCl_3$ ): 8.37-8.34 (m, 1H), 8.28 (dd,  $J_1 = 8.0$  Hz,  $J_2 = 1.6$  Hz, 1H), 7.54-7.42 (m, 4H), 6.96-6.94 (m, 1H), 6.91-6.86 (m, 2H), 6.70 (d,  $J = 10.0$  Hz, 1H), 4.29-4.17 (m, 2H), 3.58 (br s, 4H), 2.63 (t,  $J = 6.0$  Hz, 2H), 2.54 (s, 2H), 2.48 (s, 2H).  $^{13}C\{^1H\}$  NMR (100 MHz,  $CDCl_3$ ):  $\delta$  184.0, 169.8, 163.7, 145.4, 142.9, 138.7, 134.7, 133.3, 131.5, 129.6, 129.5, 128.8, 128.7, 128.2, 128.1, 127.3, 124.4, 66.9, 55.8, 54.3, 53.8, 37.6. HRMS (ESI) m/z:  $[M+H]^+$  Calcd for  $C_{24}H_{23}N_2O_4$  403.1652; Found 403.1651.

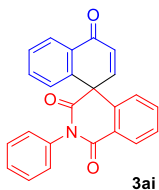

### 2-Phenyl-1*H*,4'*H*-spiro[isoquinoline-4,1'-naphthalene]-1,3,4'(2*H*)-trione (3ai)

Eluent: petroleum ether/ethyl acetate (8:1). White solid (46.7 mg, 64%), mp 208.1-209.6 °C.  $^1H$  NMR (600 MHz,  $CDCl_3$ ): 8.41 (dd,  $J_1 = 7.8$  Hz,  $J_2 = 1.8$  Hz, 1H), 8.28 (dd,  $J_1 = 7.2$  Hz,  $J_2 = 1.2$  Hz, 1H), 7.60-7.46 (m, 6H), 7.44-7.43 (m, 1H), 7.17 (d,  $J = 7.2$  Hz, 2H), 7.08-7.07 (m, 1H), 7.02 (dd,  $J_1 = 7.8$  Hz,  $J_2 = 1.2$  Hz, 1H), 6.99 (d,  $J = 9.6$  Hz, 1H), 6.75 (d,  $J = 10.2$  Hz, 1H).  $^{13}C\{^1H\}$  NMR (100 MHz,  $CDCl_3$ ):  $\delta$  183.8, 169.5, 163.9, 144.8, 142.5, 138.9, 135.1, 134.7, 133.5, 131.4, 130.3, 129.9, 129.4, 129.1, 128.9, 128.8, 128.3, 128.2, 127.6, 124.8, 54.7. HRMS (ESI) m/z:  $[M+Na]^+$  Calcd for  $C_{24}H_{15}NNaO_3$  388.0944; Found 388.0944.

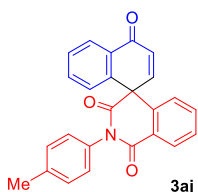



### 2-(*p*-Tolyl)-1*H*,4'*H*-spiro[isoquinoline-4,1'-naphthalene]-1,3,4'(2*H*)-trione (3aj)

Eluent: petroleum ether/ethyl acetate (7:1). White solid (57.6 mg, 76%), mp 234.4-235.9 °C. <sup>1</sup>H NMR (400 MHz, CDCl<sub>3</sub>): 8.41- 8.39 (m, 1H), 8.29-8.26 (m, 1H), 7.58-7.48 (m, 4H), 7.28-7.26 (m, 2H), 7.08-6.97 (m, 5H), 6.75 (d, *J* = 10.0 Hz, 1H), 2.39 (s, 3H). <sup>13</sup>C{<sup>1</sup>H} NMR (100 MHz, CDCl<sub>3</sub>): δ 183.9, 169.5, 164.0, 144.9, 142.6, 139.0, 138.9, 135.0, 133.5, 132.0, 131.4, 130.2, 130.1, 129.9, 129.0, 128.8, 128.2, 127.8, 127.6, 127.5, 124.8, 54.7, 21.3. HRMS (ESI) *m/z*: [M+Na]<sup>+</sup> Calcd for C<sub>25</sub>H<sub>17</sub>NNaO<sub>3</sub> 402.1101; Found 402.1099.

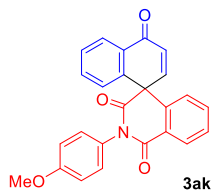

### 2-(4-Methoxyphenyl)-1*H*,4'*H*-spiro[isoquinoline-4,1'-naphthalene]-1,3,4'(2*H*)-trione (3ak)

Eluent: petroleum ether/ethyl acetate (7:1). White solid (61.6 mg, 78%), mp 193.2-194.6 °C. <sup>1</sup>H NMR (400 MHz, CDCl<sub>3</sub>): 8.41-8.39 (m, 1H), 8.29-8.26 (m, 1H), 7.60-7.47 (m, 4H), 7.09-7.05 (m, 3H), 7.02-6.97 (m, 4H), 6.75 (d, *J* = 10.0 Hz, 1H), 3.82 (s, 3H). <sup>13</sup>C{<sup>1</sup>H} NMR (100 MHz, CDCl<sub>3</sub>): δ 183.9, 169.7, 164.1, 159.7, 144.9, 142.6, 138.8, 135.0, 133.4, 131.4, 130.2, 129.9, 129.1, 129.0, 128.7, 128.2, 127.6, 127.5, 127.2, 124.8, 114.7, 55.5, 54.8. HRMS (ESI) *m/z*: [M+Na]<sup>+</sup> Calcd for C<sub>25</sub>H<sub>17</sub>NNaO<sub>4</sub> 418.1050; Found 418.1050.

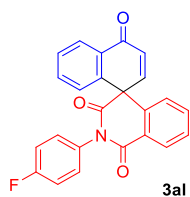

### 2-(4-Fluorophenyl)-1*H*,4'*H*-spiro[isoquinoline-4,1'-naphthalene]-1,3,4'(2*H*)-trione (3al)

Eluent: petroleum ether/ethyl acetate (10:1). White solid (61.3 mg, 80%), mp 253.2-254.8 °C. <sup>1</sup>H NMR (400 MHz, CDCl<sub>3</sub>): δ 8.41-8.39 (m, 1H), 8.29-8.27 (m, 1H), 7.62-7.48 (m, 4H), 7.16-7.14 (m, 4H), 7.06-7.01 (m, 2H), 6.97 (d, *J* = 10.0 Hz, 1H), 6.75 (d, *J* = 10.0 Hz, 1H). <sup>13</sup>C{<sup>1</sup>H} NMR (100 MHz, CDCl<sub>3</sub>): δ 183.7, 169.6, 163.9, 162.6 (d, <sup>1</sup>*J*<sub>C-F</sub> = 247.7 Hz), 144.6, 142.4, 138.9, 135.2, 133.5, 131.4, 130.5 (d, <sup>4</sup>*J*<sub>C-F</sub> = 3.7 Hz), 130.3, 130.0 (d, <sup>3</sup>*J*<sub>C-F</sub> = 8.7 Hz), 129.9, 129.1, 128.9, 128.3, 127.6, 127.5, 124.6, 116.5 (d, <sup>2</sup>*J*<sub>C-F</sub> = 23.1 Hz), 54.7.

$^{19}\text{F}$  NMR (376 MHz,  $\text{CDCl}_3$ ):  $\delta$  -112.19 - -112.26 (m). HRMS (ESI)  $m/z$ :  $[\text{M}+\text{Na}]^+$  Calcd for  $\text{C}_{24}\text{H}_{14}\text{FNNaO}_3$  406.0850; Found 406.0846.

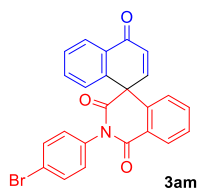

### 2-(4-Bromophenyl)-1*H*,4'*H*-spiro[isoquinoline-4,1'-naphthalene]-1,3,4'(2*H*)-trione (3am)

Eluent: petroleum ether/ethyl acetate (9:1). White solid (71.8 mg, 81%), mp 226.6-228.1 °C.  $^1\text{H}$  NMR (400 MHz,  $\text{CDCl}_3$ ):  $\delta$  8.39 (dd,  $J_1 = 7.6$  Hz,  $J_2 = 1.6$  Hz, 1H), 8.29-8.27 (m, 1H), 7.61-7.56 (m, 4H), 7.52-7.49 (m, 2H), 7.07-7.00 (m, 4H), 6.96 (d,  $J = 10.0$  Hz, 1H), 6.75 (d,  $J = 10.0$  Hz, 1H).  $^{13}\text{C}\{^1\text{H}\}$  NMR (100 MHz,  $\text{CDCl}_3$ ):  $\delta$  183.7, 169.4, 163.7, 144.6, 142.4, 138.9, 135.2, 133.7, 133.5, 132.6, 131.4, 130.3, 130.0, 129.9, 129.1, 128.9, 128.3, 127.6, 127.5, 124.5, 123.1, 54.7. HRMS (ESI)  $m/z$ :  $[\text{M}+\text{Na}]^+$  Calcd for  $\text{C}_{24}\text{H}_{14}\text{BrNNaO}_3$  466.0049; Found 466.0049.

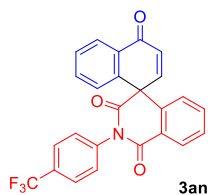

### 2-(4-(Trifluoromethyl)phenyl)-1*H*,4'*H*-spiro[isoquinoline-4,1'-naphthalene]-1,3,4'(2*H*)-trione (3an)

Eluent: petroleum ether/ethyl acetate (9:1). White solid (65.8 mg, 76%), mp 241.6-243.1 °C.  $^1\text{H}$  NMR (600 MHz,  $\text{CDCl}_3$ ):  $\delta$  8.40 (d,  $J = 7.2$  Hz, 1H), 8.29-8.28 (m, 1H), 7.74 (d,  $J = 8.4$  Hz, 2H), 7.62-7.56 (m, 2H), 7.54-7.49 (m, 2H), 7.32 (d,  $J = 8.4$  Hz, 2H), 7.06 (d,  $J = 7.2$  Hz, 1H), 7.04 (d,  $J = 7.8$  Hz, 1H), 6.98 (d,  $J = 9.6$  Hz, 1H), 6.76 (d,  $J = 10.2$  Hz, 1H).  $^{13}\text{C}\{^1\text{H}\}$  NMR (150 MHz,  $\text{CDCl}_3$ ):  $\delta$  183.7, 169.4, 163.7, 144.4, 142.3, 138.9, 137.9, 135.4, 133.6, 131.4, 131.2 (q,  $^2J_{\text{C-F}} = 32.1$  Hz), 130.4, 129.9, 129.2, 129.0, 128.9, 128.4, 127.7, 127.5, 126.5 (q,  $^3J_{\text{C-F}} = 3.3$  Hz), 124.4, 123.7 (q,  $^1J_{\text{C-F}} = 270.1$  Hz), 54.7.  $^{19}\text{F}$  NMR (376 MHz,  $\text{CDCl}_3$ ):  $\delta$  -62.72 (s). HRMS (ESI)  $m/z$ :  $[\text{M}+\text{Na}]^+$  Calcd for  $\text{C}_{25}\text{H}_{14}\text{F}_3\text{NNaO}_3$  456.0818; Found 456.0819.

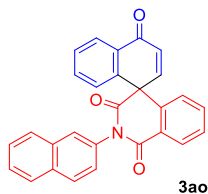

**2-(Naphthalen-2-yl)-1*H*,4'*H*-spiro[isoquinoline-4,1'-naphthalene]-1,3,4'(2*H*)-trione (3ao)**

Eluent: petroleum ether/ethyl acetate (9:1). White solid (53.9 mg, 65%), mp 283.6-285.1 °C. <sup>1</sup>H NMR (400 MHz, CDCl<sub>3</sub>): δ 8.42 (d, *J* = 7.2 Hz, 1H), 8.29 (d, *J* = 7.6 Hz, 1H), 7.93 (d, *J* = 8.8 Hz, 1H), 7.87 (d, *J* = 8.0 Hz, 1H), 7.82 (d, *J* = 7.2 Hz, 1H), 7.69 (s, 1H), 7.60-7.48 (m, 6H), 7.25-7.22 (m, 1H), 7.14 (d, *J* = 7.6 Hz, 1H), 7.04-7.01 (m, 2H), 6.76 (d, *J* = 10.0 Hz, 1H). <sup>13</sup>C{<sup>1</sup>H} NMR (100 MHz, CDCl<sub>3</sub>): δ 183.8, 169.7, 164.1, 144.8, 142.6, 139.0, 135.1, 133.5, 133.4, 133.2, 132.1, 131.4, 130.3, 129.9, 129.4, 129.1, 128.8, 128.3, 128.2, 127.9, 127.7, 127.6, 127.4, 127.0, 126.6, 125.5, 124.8, 54.8. HRMS (ESI) *m/z*: [M+Na]<sup>+</sup> Calcd for C<sub>28</sub>H<sub>17</sub>NNaO<sub>3</sub> 438.1101; Found 438.1101.

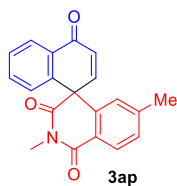

**2,6-Dimethyl-1*H*,4'*H*-spiro[isoquinoline-4,1'-naphthalene]-1,3,4'(2*H*)-trione (3ap)**

Eluent: petroleum ether/ethyl acetate (10:1). White solid (32.3 mg, 51%), mp 176.8-178.6 °C. <sup>1</sup>H NMR (400 MHz, CDCl<sub>3</sub>): δ 8.28-8.25 (m, 1H), 8.17 (d, *J* = 0.8 Hz, 1H), 7.47-7.43 (m, 2H), 7.33 (dd, *J*<sub>1</sub> = 8.0 Hz, *J*<sub>2</sub> = 1.6 Hz, 1H), 6.85-6.78 (m, 3H), 6.68 (d, *J* = 10.0 Hz, 1H), 3.42 (s, 3H), 2.44 (s, 3H). <sup>13</sup>C{<sup>1</sup>H} NMR (100 MHz, CDCl<sub>3</sub>): δ 184.0, 170.0, 164.2, 145.4, 143.0, 139.1, 135.8, 135.7, 133.4, 131.5, 129.6, 129.5, 128.6, 128.1, 127.8, 127.3, 124.2, 54.1, 28.0, 21.1. HRMS (ESI) *m/z*: [M+Na]<sup>+</sup> Calcd for C<sub>20</sub>H<sub>15</sub>NNaO<sub>3</sub> 340.0944; Found 340.0944.

### III. Structural elaborations

#### 1. Synthesis of 4

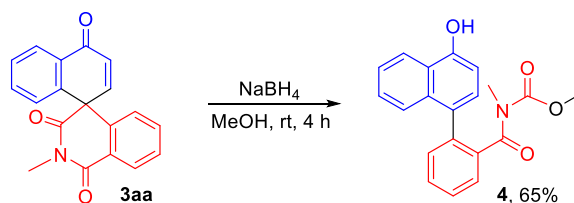

To a flask containing a solution of **3aa** (30.3 mg, 0.1 mmol) in MeOH (1.5 mL) was charged with NaBH<sub>4</sub> (3.0 mg, 0.08 mmol) at 0 °C. The resulting mixture was stirred at 0 °C for 10 min, and then at rt for 4 h. Upon completion, it was concentrated under reduced pressure. The residue was purified by column chromatography on silica gel with petroleum ether/ethyl acetate (5:1) as the eluent to give **4**.

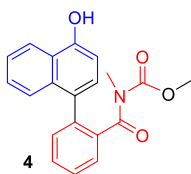

#### Methyl (2-(4-hydroxynaphthalen-1-yl)benzoyl)(methyl)carbamate (**4**)

Eluent: petroleum ether/ethyl acetate (5:1). White solid (21.8 mg, 65%), mp 202.5-203.9 °C. <sup>1</sup>H NMR (400 MHz, CDCl<sub>3</sub>): δ 8.25 (d, *J* = 7.6 Hz, 1H), 7.68 (d, *J* = 8.0 Hz, 1H), 7.59 (dd, *J*<sub>1</sub> = 7.2 Hz, *J*<sub>2</sub> = 1.2 Hz, 1H), 7.55-7.38 (m, 5H), 7.12 (d, *J* = 7.6 Hz, 1H), 6.73 (d, *J* = 8.0 Hz, 1H), 6.23 (s, 1H), 3.23 (s, 3H), 2.63 (s, 3H). <sup>13</sup>C{<sup>1</sup>H} NMR (100 MHz, CDCl<sub>3</sub>): δ 173.5, 154.4, 151.6, 138.5, 137.0, 132.7, 131.2, 129.9, 129.6, 127.6, 127.5, 127.1, 126.5, 126.1, 125.2, 124.4, 121.9, 107.7, 53.2, 31.4. HRMS (ESI) *m/z*: [M+Na]<sup>+</sup> Calcd for C<sub>20</sub>H<sub>17</sub>NNaO<sub>4</sub> 358.1050; Found 358.1050.

#### 2. Synthesis of 5<sup>5</sup>

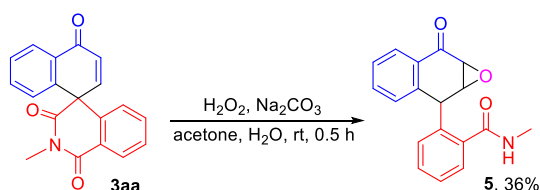

To a flask containing a solution of Na<sub>2</sub>CO<sub>3</sub> (31 mg, 0.3 mmol) in H<sub>2</sub>O (1.5 mL) were charged with 30% H<sub>2</sub>O<sub>2</sub> (31 μL, 0.3 mmol) and a solution of **3aa** (30.3 mg, 0.1 mmol) in acetone (1 mL) in a dropwise manner at 0 °C. After being stirred at room temperature for 0.5 h, it was quenched with saturated Na<sub>2</sub>S<sub>2</sub>O<sub>3</sub> solution

and extracted with dichloromethane (10 mL × 3). The combined organic layers were washed with water and brine, dried over anhydrous Na<sub>2</sub>SO<sub>4</sub>, filtered and concentrated under reduced pressure. The crude product thus obtained was purified by column chromatography on silica gel using petroleum ether/ethyl acetate (1:1) as eluent to afford **5**.

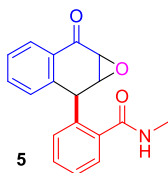

### *N*-Methyl-2-(7-oxo-1a,2,7,7a-tetrahydronaphtho[2,3-*b*]oxiren-2-yl)benzamide (**5**)

Eluent: petroleum ether/ethyl acetate (1:1). White solid (10.6 mg, 36%), mp 250.1-251.9 °C. <sup>1</sup>H NMR (600 MHz, CDCl<sub>3</sub>): δ 8.31-8.30 (m, 1H), 8.08 (d, *J* = 7.8 Hz, 1H), 7.90 (d, *J* = 7.2 Hz, 1H), 7.85 (t, *J* = 7.8 Hz, 1H), 7.56 (t, *J* = 7.8 Hz, 1H), 7.36 (t, *J* = 7.2 Hz, 1H), 7.31 (t, *J* = 7.2 Hz, 1H), 6.84 (d, *J* = 6.6 Hz, 1H), 6.04 (br s, 1H), 4.11 (dd, *J*<sub>1</sub> = 13.2 Hz, *J*<sub>2</sub> = 4.8 Hz, 1H), 3.07 (dd, *J*<sub>1</sub> = 17.4 Hz, *J*<sub>2</sub> = 4.2 Hz, 1H), 2.95 (s, 3H), 2.36 (dd, *J*<sub>1</sub> = 17.4 Hz, *J*<sub>2</sub> = 12.6 Hz, 1H). <sup>13</sup>C{<sup>1</sup>H} NMR (100 MHz, CDCl<sub>3</sub>): δ 194.2, 163.2, 143.6, 138.5, 134.4, 132.7, 130.9, 129.1, 129.0, 128.7, 128.3, 128.1, 127.4, 127.3, 71.5, 65.1, 40.9, 34.0. HRMS (ESI) *m/z*: [M+Na]<sup>+</sup> Calcd for C<sub>18</sub>H<sub>15</sub>NNaO<sub>3</sub> 316.0944; Found 316.0943.

### 3. Synthesis of **6**<sup>6</sup>

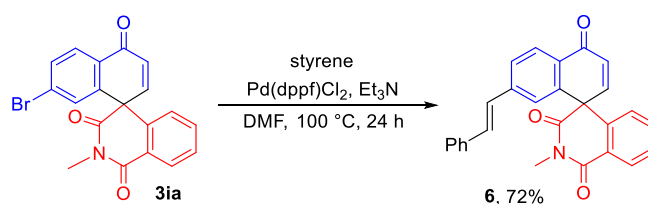

To a reaction tube equipped with a stir bar were charged with **3ia** (38.1 mg, 0.1 mmol), styrene (11.5 μL, 0.1 mmol), Pd(dppf)Cl<sub>2</sub> (7.3 mg, 0.01 mmol), Et<sub>3</sub>N (20.2 mg, 0.2 mmol) and DMF (0.5 mL). The tube was then sealed and the resulting mixture was stirred at 100 °C (oil bath) under argon for 24 h. Upon completion, it was diluted with water and extracted with ethyl acetate (10 mL × 3). The combined organic layers were dried over anhydrous Na<sub>2</sub>SO<sub>4</sub>, filtered and concentrated under reduced pressure. The residue was purified by column chromatography on silica gel with petroleum ether/ethyl acetate (5:1) as the eluent to give **6**.

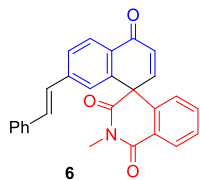

**(E)-2-Methyl-7'-styryl-1H,4'H-spiro[isoquinoline-4,1'-naphthalene]-1,3,4'(2H)-trione (6)**

Eluent: petroleum ether/ethyl acetate (5:1). White solid (29.2 mg, 72%), mp 187.9-189.6 °C. <sup>1</sup>H NMR (400 MHz, CDCl<sub>3</sub>): δ 8.41-8.39 (m, 1H), 8.26 (d, *J* = 8.0 Hz, 1H), 7.68 (d, *J*<sub>1</sub> = 8.0 Hz, *J*<sub>2</sub> = 1.2 Hz, 1H), 7.56-7.51 (m, 2H), 7.45 (d, *J* = 7.2 Hz, 2H), 7.33 (t, *J* = 7.2 Hz, 2H), 7.28-7.25 (m, 1H), 7.07 (d, *J* = 16.4 Hz, 1H), 6.96-6.91 (m, 2H), 6.82 (d, *J* = 1.2 Hz, 1H), 6.78 (d, *J* = 10.0 Hz, 1H), 6.67 (d, *J* = 10.0 Hz, 1H), 3.47 (s, 3H). <sup>13</sup>C{<sup>1</sup>H} NMR (100 MHz, CDCl<sub>3</sub>): δ 183.5, 169.9, 164.0, 144.9, 143.4, 142.5, 138.8, 136.3, 134.8, 132.3, 130.5, 129.7, 129.5, 128.9, 128.8, 128.6, 128.3, 127.8, 126.9, 126.8, 126.5, 125.8, 124.4, 54.4, 28.1. HRMS (ESI) *m/z*: [M+Na]<sup>+</sup> Calcd for C<sub>27</sub>H<sub>19</sub>NNaO<sub>3</sub> 428.1257; Found 428.1256.

**4. Synthesis of 7<sup>7</sup>**

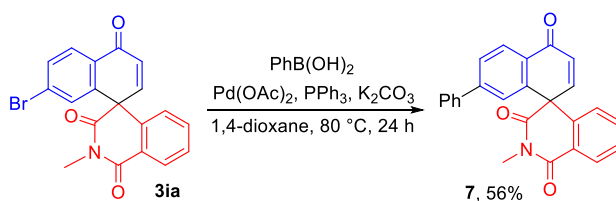

To a reaction tube equipped with a stir bar were added with **3ia** (38.1 mg, 0.1 mmol), phenylboronic acid (18.3 mg, 0.15 mmol), PPh<sub>3</sub> (15.7 mg, 0.06 mmol), K<sub>2</sub>CO<sub>3</sub> (55.3 mg, 0.4 mmol), Pd(OAc)<sub>2</sub> (2.2 mg, 0.01 mmol) and dioxane (1 mL). The tube was then sealed, and the mixture was stirred at 80 °C (oil bath) under argon for 24 h. Upon completion, it was diluted with water and extracted with ethyl acetate (10 mL × 3). The organic layer was dried over anhydrous Na<sub>2</sub>SO<sub>4</sub> and concentrated under reduced pressure. The residue was purified by column chromatography on silica gel with petroleum ether/ethyl acetate (4:1) as eluent to give **7**.

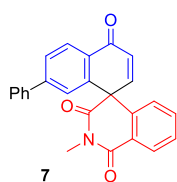

**2-Methyl-7'-phenyl-1H,4'H-spiro[isoquinoline-4,1'-naphthalene]-1,3,4'(2H)-trione (7)**

Eluent: petroleum ether/ethyl acetate (4:1). Yellow solid (21.2 mg, 56%), mp 196.2-197.9 °C.  $^1\text{H}$  NMR (400 MHz,  $\text{CDCl}_3$ ):  $\delta$  8.40-8.37 (m, 1H), 8.34 (d,  $J = 8.4$  Hz, 1H), 7.70 (dd,  $J_1 = 8.4$  Hz,  $J_2 = 1.6$  Hz, 1H), 7.56-7.52 (m, 2H), 7.39-7.35 (m, 5H), 6.98-6.95 (m, 2H), 6.82 (d,  $J = 10.0$  Hz, 1H), 6.70 (d,  $J = 10.0$  Hz, 1H), 3.46 (s, 3H).  $^{13}\text{C}\{^1\text{H}\}$  NMR (100 MHz,  $\text{CDCl}_3$ ):  $\delta$  183.8, 169.9, 164.0, 146.3, 145.2, 143.4, 139.2, 138.8, 134.8, 130.4, 129.7, 129.5, 129.0, 128.9, 128.6, 128.3, 127.9, 127.6, 127.3, 126.4, 124.4, 54.5, 28.1. HRMS (ESI)  $m/z$ :  $[\text{M}+\text{Na}]^+$  Calcd for  $\text{C}_{25}\text{H}_{17}\text{NNaO}_3$  402.1101; Found 402.1099.

## 5. Gram-scale synthesis of **3aa**

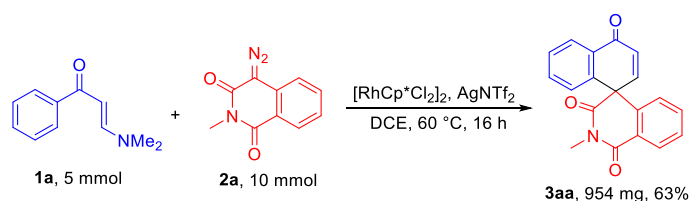

To a reaction tube equipped with a stir bar were added **1a** (875.0 mg, 5 mmol),  $[\text{RhCp}^*\text{Cl}_2]_2$  (124 mg, 0.2 mmol),  $\text{AgNTf}_2$  (776 mg, 2 mmol), **2a** (2010 mg, 10 mmol) and DCE (20 mL). The tube was then sealed, and the mixture was stirred at 60 °C (oil bath) under air for 16 h. Upon completion, it was cooled to room temperature, filtered through a pad of celite and concentrated under reduced pressure. The residue was purified by silica gel column chromatography using petroleum ether/ethyl acetate (8:1) as eluent to afford **3aa** (954 mg, 63%).

## IV. Mechanism studies

### 1. Studies on the reversibility of C–H bond activation

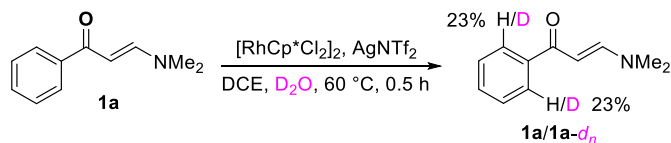

To a reaction tube equipped with a stir bar were charged with **1a** (35.0 mg, 0.2 mmol),  $[\text{RhCp}^*\text{Cl}_2]_2$  (5.0 mg, 0.008 mmol),  $\text{AgNTf}_2$  (31.1 mg, 0.08 mmol), DCE (2 mL) and  $\text{D}_2\text{O}$  (36.2 uL, 2 mmol). The tube was then sealed, and the resulting mixture was stirred at 60 °C (oil bath) under air for 0.5 h. Afterwards, it was cooled to room temperature, filtered through a pad of celite and concentrated under reduced pressure. The residue was purified by column chromatography on silica gel using petroleum ether/ethyl acetate (2:1) as eluent to give a mixture of **1a** and **1a-d<sub>n</sub>**. Upon analyzing the  $^1\text{H}$  NMR spectrum of the mixture, the deuteration ratio on the *ortho*-positions of **1a** was determined to be 23%.

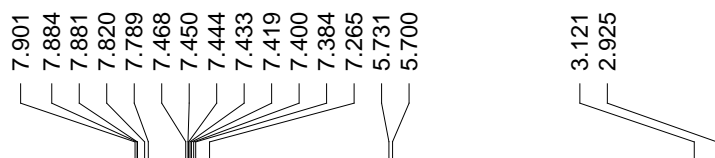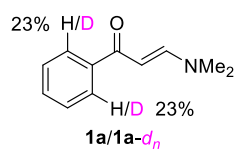

$^1\text{H}$  NMR (400MHz,  $\text{CDCl}_3$ )

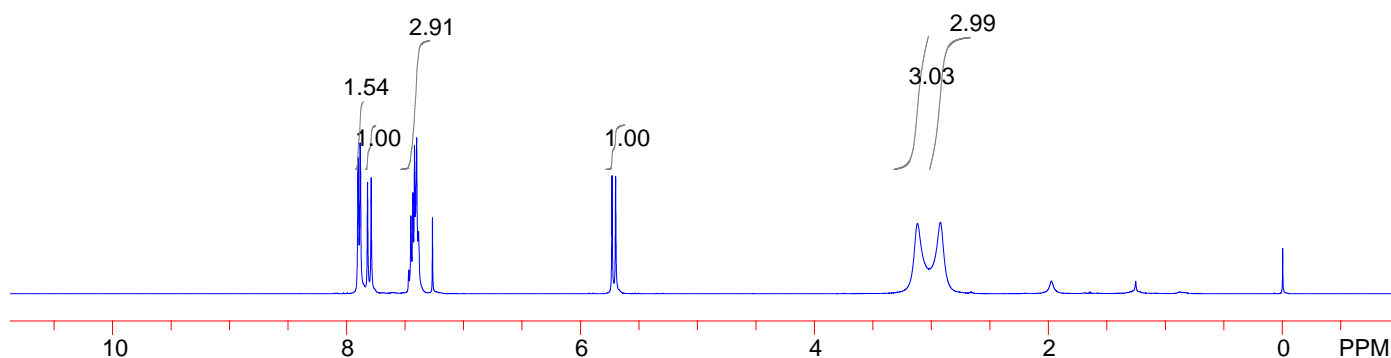



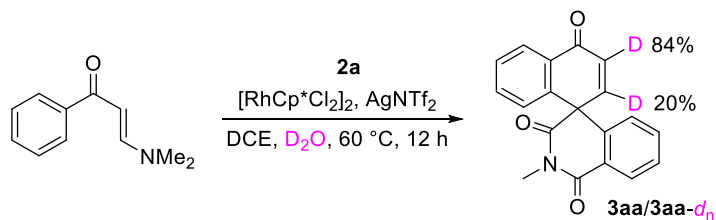

To a reaction tube equipped with a stir bar were charged with **1a** (35.0 mg, 0.2 mmol),  $[\text{RhCp}^*\text{Cl}_2]_2$  (5.0 mg, 0.008 mmol),  $\text{AgNTf}_2$  (31.1 mg, 0.08 mmol), **2a** (80.1 mg, 0.4 mmol), DCE (2 mL) and  $\text{D}_2\text{O}$  (36.2  $\mu\text{L}$ , 2 mmol). The resulting mixture was stirred at 60 °C (oil bath) under air for 12 h. Afterwards, it was cooled to room temperature, filtered through a pad of celite, and concentrated under reduced pressure. The residue was purified by column chromatography on silica gel using petroleum ether/ethyl acetate (8:1) as eluent to give a mixture of **3aa** and **3aa- $d_n$**  (33.9 mg, 56%). Upon analyzing the  $^1\text{H}$  NMR spectrum of the mixture, the deuteration percentages at different positions were determined as 84% and 20%.

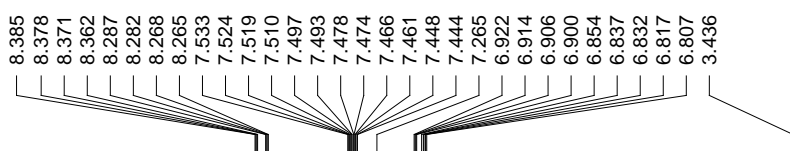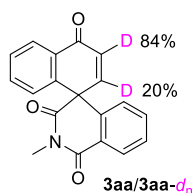

$^1\text{H}$  NMR (400MHz,  $\text{CDCl}_3$ )

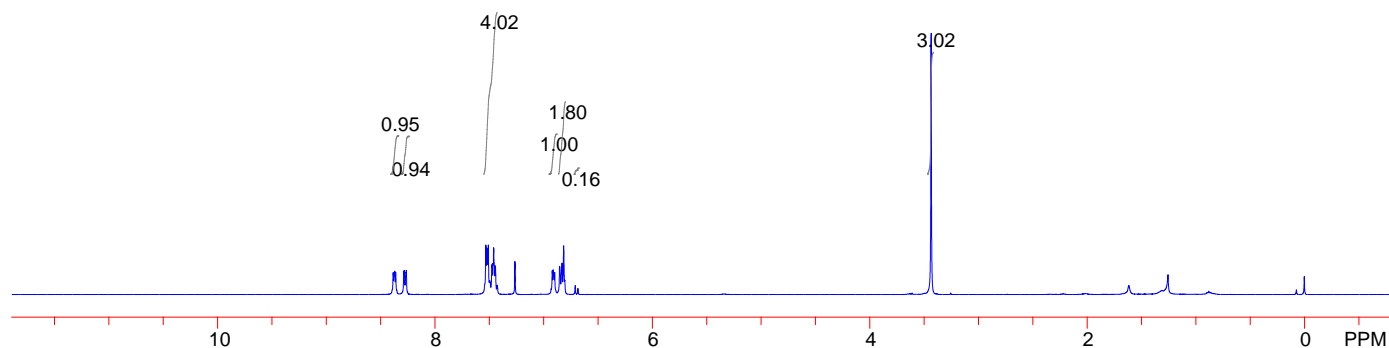

## 2. Kinetic isotope effect experiments

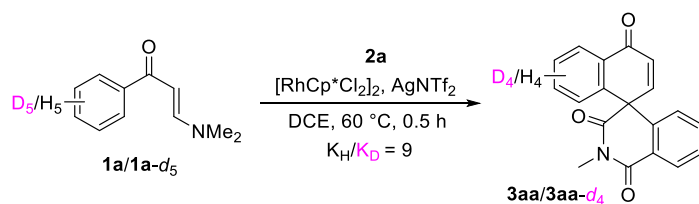

To a reaction tube equipped with a stir bar were charged with **1a** (35.0 mg, 0.2 mmol), **1a-d<sub>5</sub>** (36.0 mg, 0.2 mmol), [RhCp\*Cl<sub>2</sub>]<sub>2</sub> (5.0 mg, 0.008 mmol), AgNTf<sub>2</sub> (31.1 mg, 0.08 mmol), **2a** (80.1 mg, 0.4 mmol) and DCE (2 mL). The resulting mixture was stirred at 60 °C (oil bath) under argon for 0.5 h. Afterwards, it was cooled to room temperature, quenched with water and extracted with dichloromethane (10 mL × 3). The combined organic phases were dried over anhydrous Na<sub>2</sub>SO<sub>4</sub>, filtered and concentrated under reduced pressure. The residue was purified by silica gel column chromatography using petroleum ether/ethyl acetate (8:1) as eluent to give a mixture of **3aa** and **3aa-d<sub>4</sub>**. Upon analyzing the <sup>1</sup>H NMR spectrum of the mixture, the ratio of **3aa** to **3aa-d<sub>4</sub>** was determined to be about 0.9:0.1. Accordingly, the intermolecular KIE ( $k_H/k_D$ ) was calculated to be 9.

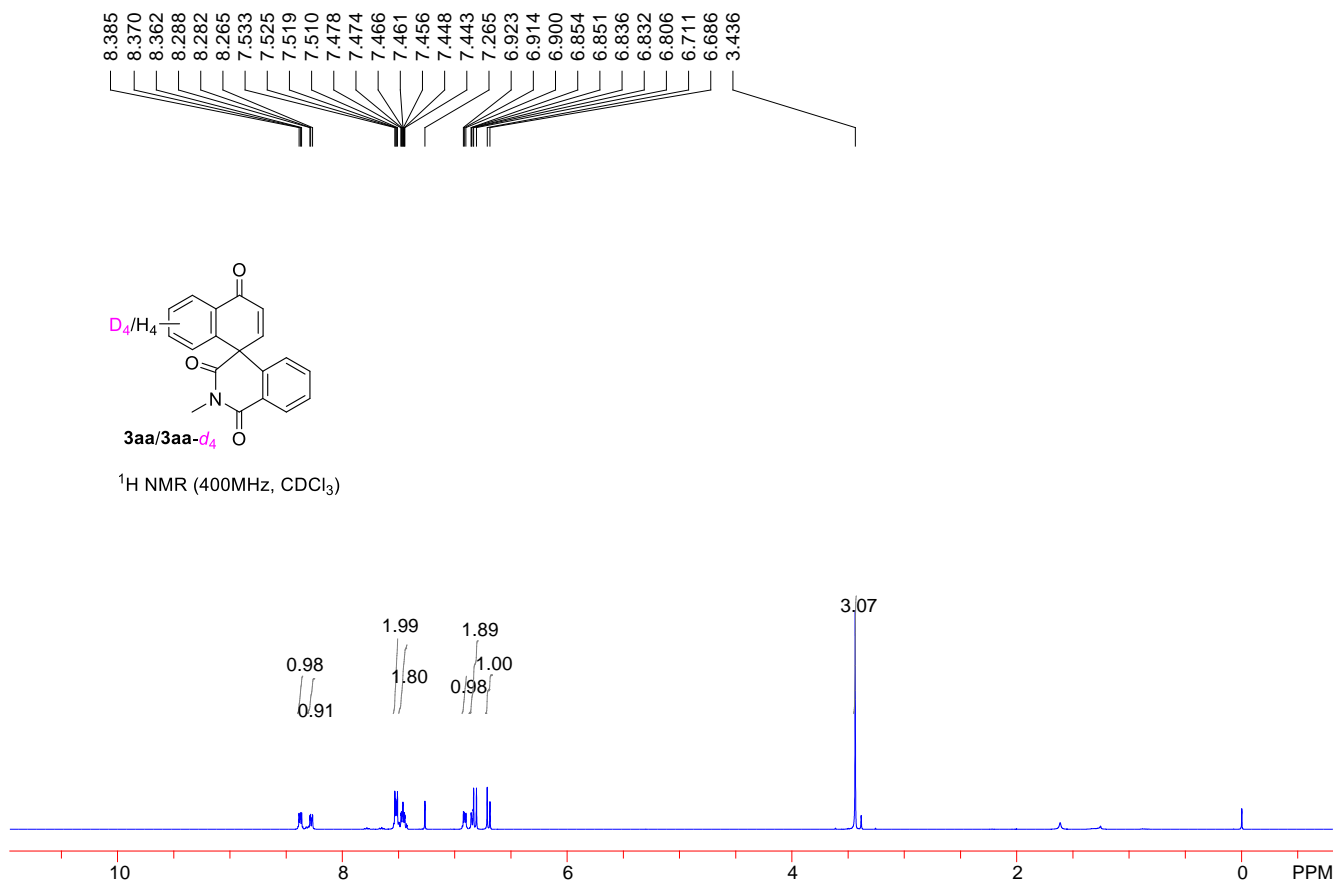

### 3. Electronic competition experiment

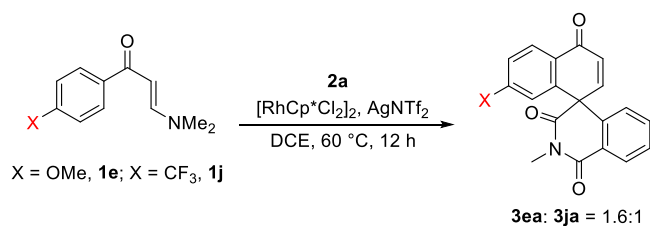

To a reaction tube equipped with a stir bar were added (*E*)-3-(dimethylamino)-1-(4-methoxyphenyl)prop-2-en-1-one (**1e**, 41.0 mg, 0.2 mmol), (*E*)-3-(dimethylamino)-1-(4-(trifluoromethyl)phenyl)prop-2-en-1-one (**1j**, 48.6 mg, 0.2 mmol), [RhCp\*Cl<sub>2</sub>]<sub>2</sub> (5.0 mg, 0.008 mmol), AgNTf<sub>2</sub> (31.1 mg, 0.08 mmol), **2a** (40.2 mg, 0.2 mmol) and DCE (2 mL). The tube was then sealed, and the mixture was stirred at 60 °C (oil bath) under air for 12 h. Upon completion, it was cooled to room temperature, filtered through a pad of celite and concentrated under reduced pressure. The residue was purified by silica gel column chromatography using petroleum ether/ethyl acetate (8:1) as eluent to afford **3ea** (16.1 mg, 24%) and **3ja** (11.9 mg, 15%).

### 4. Control Experiments

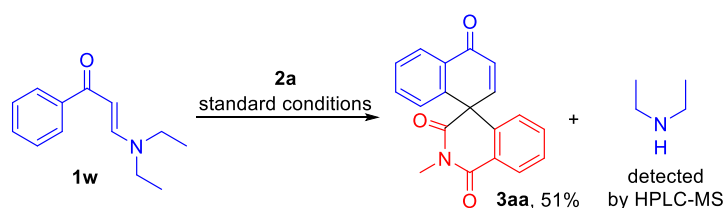

**4.1.** To a reaction tube equipped with a stir bar were charged with (*E*)-3-(diethylamino)-1-phenylprop-2-en-1-one (**1w**, 40.6 mg, 0.2 mmol), [RhCp\*Cl<sub>2</sub>]<sub>2</sub> (5.0 mg, 0.008 mmol), AgNTf<sub>2</sub> (31.1 mg, 0.08 mmol), **2a** (80.1 mg, 0.4 mmol) and DCE (2 mL). The resulting mixture was stirred at 60 °C under argon for 12 h. From the resulting mixture, the formation of diethylamine was detected by HPLC-MS, and **3aa** was isolated in 51% yield.

## Generic Display Report

|               |                                 |                  |                   |
|---------------|---------------------------------|------------------|-------------------|
| Analysis Info |                                 | Acquisition Date | 2023/4/19 9:35:42 |
| Analysis Name | E:\S-Ota\ky\0418_RC7_01_23412.d | Operator         | Demo User         |
| Method        | LC_NO UV_P50-1500_6MIN.m        | Instrument       | compact           |
| Sample Name   | 0418                            |                  |                   |
| Comment       |                                 |                  |                   |

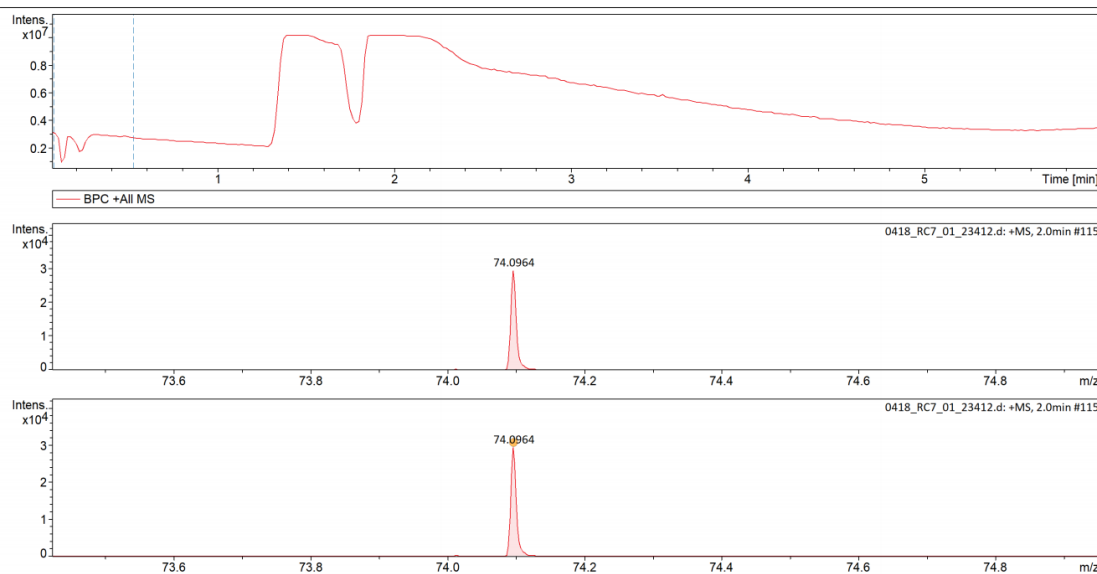

Bruker Compass DataAnalysis 4.4      printed: 2018/4/19 18:22:59      by: 111111      Page 1 of 1

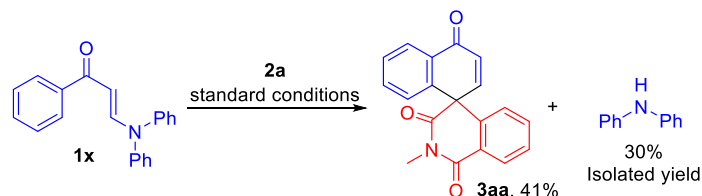

**4.2.** To a reaction tube equipped with a stir bar were charged with (*E*)-3-(diphenylamino)-1-phenylprop-2-en-1-one (**1x**, 59.8 mg, 0.2 mmol), [RhCp\*Cl<sub>2</sub>]<sub>2</sub> (5.0 mg, 0.008 mmol), AgNTf<sub>2</sub> (31.1 mg, 0.08 mmol), **2a** (80.1 mg, 0.4 mmol) and DCE (2 mL). The resulting mixture was stirred at 60 °C (oil bath) under air for 12 h. From the resulting mixture, diphenylamine was isolated in 30% yield, and **3aa** was isolated in 41% yield.

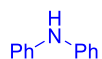

### Diphenylamine

Eluent: petroleum ether/ethyl acetate (20:1). White solid (10.2 mg, 30%), <sup>1</sup>H NMR (400 MHz, CDCl<sub>3</sub>): δ 7.28-7.24 (m, 4H), 7.09-7.06 (m, 4H), 6.94-6.91 (m, 2H), 5.70 (s, 1H). <sup>13</sup>C{<sup>1</sup>H} NMR (100 MHz, CDCl<sub>3</sub>): δ 143.1, 129.4, 121.0, 117.8. HRMS (ESI) m/z: [M+H]<sup>+</sup> Calcd for C<sub>12</sub>H<sub>12</sub>N 170.0964; Found 170.0966.

7.284  
7.279  
7.265  
7.263  
7.253  
7.249  
7.244  
7.239  
7.085  
7.082  
7.063  
6.944  
6.926  
6.908  
5.698

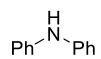

<sup>1</sup>H NMR (400 MHz, CDCl<sub>3</sub>)

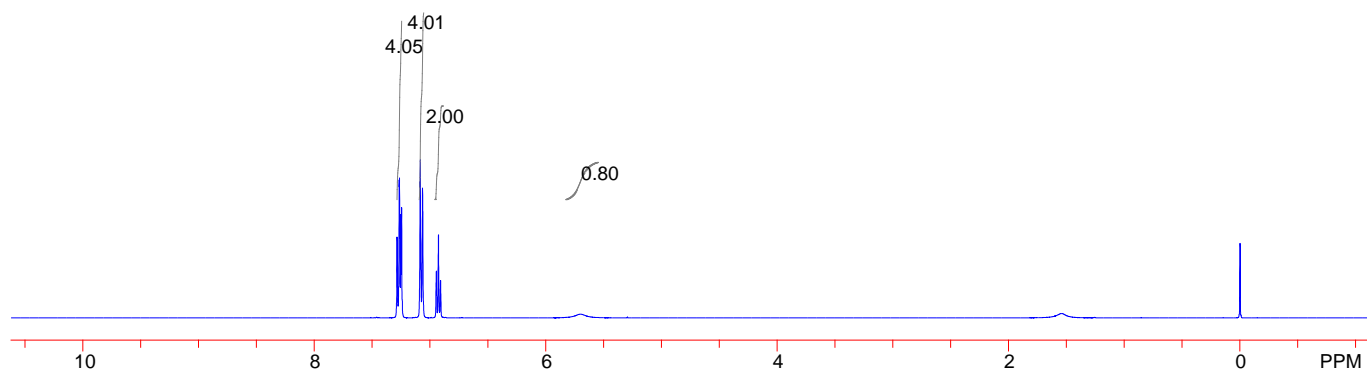

143.141  
129.367  
121.039  
117.847  
77.349  
77.031  
76.713

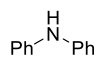

<sup>13</sup>C NMR (100 MHz, CDCl<sub>3</sub>)

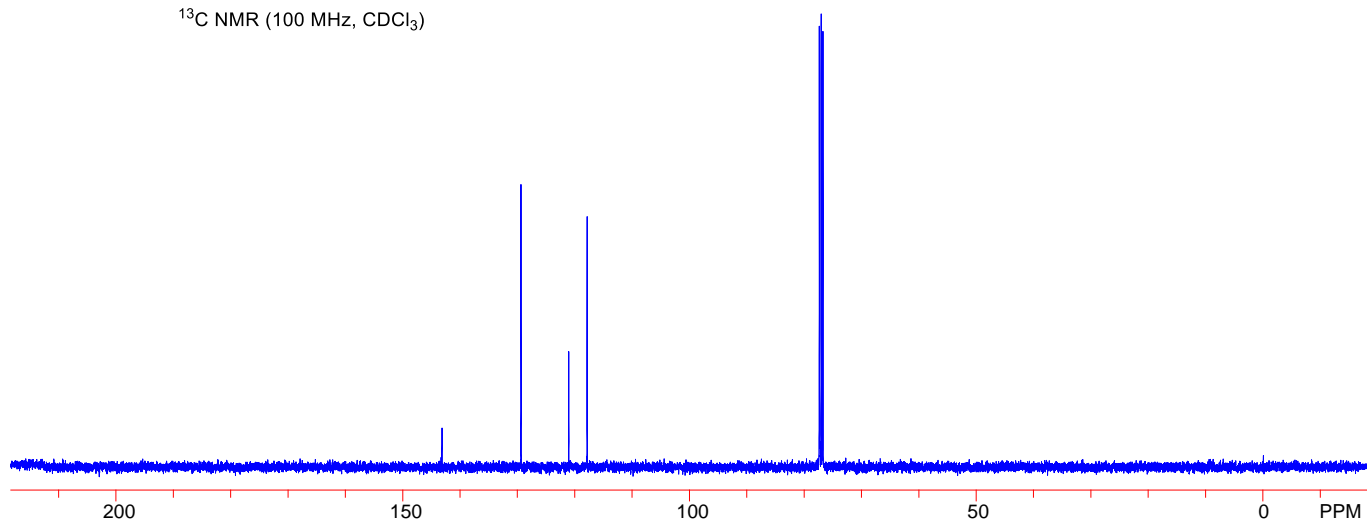

## V. X-Ray crystal structure and data for 3aa

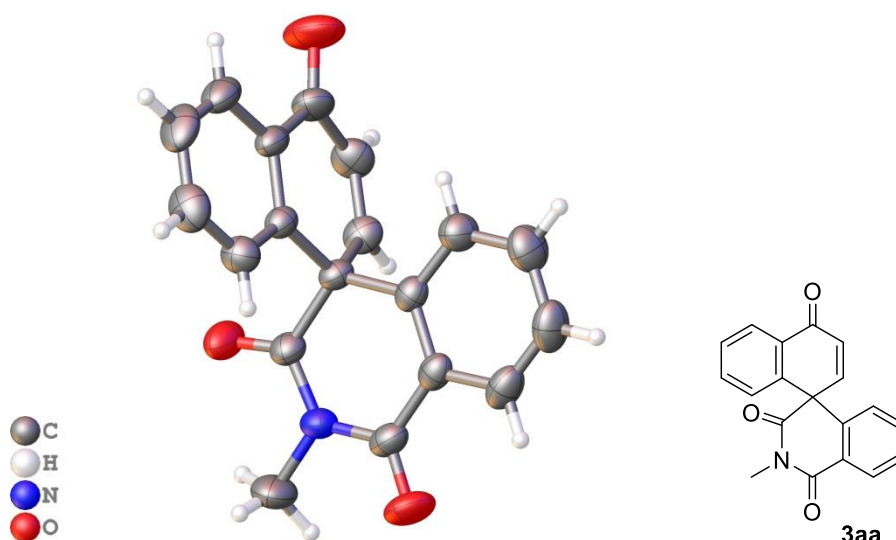

**Fig. S1.** X-ray crystal structure of **3aa** with 50% ellipsoid probability

**X-Ray structure determination.** Single crystals suitable for X-ray diffraction were obtained by slow evaporation of the solvent from a petroleum ether/dichloromethane (3:1) solution of **3aa**. Crystal data collection and refinement parameters of **3aa** are summarized in Table S1. Intensity data were collected at 293 K on a SuperNova Dual diffractometer using mirror-monochromated Cu K $\alpha$  radiation,  $\lambda = 1.54184$  Å. The data were corrected for decay, Lorentz, and polarization effects as well as absorption and beam corrections based on the multi-scan technique. Using Olex2, the structure was solved with the SHELXS structure solution program using Direct Methods and refined with the SHELXL refinement package using Least Squares minimisation. Nonhydrogen atoms were refined with anisotropic displacement parameters. The H-atoms were either located or calculated and subsequently treated with a riding model.

**Table S1.** Crystallographic data and structure refinement results of **3aa**

|                   |                                                 |
|-------------------|-------------------------------------------------|
| Empirical formula | C <sub>19</sub> H <sub>13</sub> NO <sub>3</sub> |
| Formula weight    | 303.30                                          |
| Temperature/K     | 293(2)                                          |
| Crystal system    | monoclinic                                      |
| Space group       | Ia                                              |
| a/Å               | 8.4176(2)                                       |
| b/Å               | 11.4940(3)                                      |

|                                             |                                                                |
|---------------------------------------------|----------------------------------------------------------------|
| c/Å                                         | 15.1975(4)                                                     |
| $\alpha$ /°                                 | 90                                                             |
| $\beta$ /°                                  | 94.974(2)                                                      |
| $\gamma$ /°                                 | 90                                                             |
| Volume/Å <sup>3</sup>                       | 1464.85(6)                                                     |
| Z                                           | 4                                                              |
| $\rho_{\text{calc}}$ /cm <sup>3</sup>       | 1.375                                                          |
| $\mu$ /mm <sup>-1</sup>                     | 0.765                                                          |
| F(000)                                      | 632.0                                                          |
| Crystal size/mm <sup>3</sup>                | 0.2 × 0.18 × 0.1                                               |
| Radiation                                   | Cu K $\alpha$ ( $\lambda$ = 1.54184)                           |
| 2 $\Theta$ range for data collection/°      | 9.662 to 143.04                                                |
| Index ranges                                | -10 ≤ h ≤ 9, -14 ≤ k ≤ 11, -17 ≤ l ≤ 18                        |
| Reflections collected                       | 6526                                                           |
| Independent reflections                     | 2600 [ $R_{\text{int}}$ = 0.0236, $R_{\text{sigma}}$ = 0.0255] |
| Data/restraints/parameters                  | 2600/2/209                                                     |
| Goodness-of-fit on F <sup>2</sup>           | 1.093                                                          |
| Final R indexes [ $I \geq 2\sigma(I)$ ]     | $R_1$ = 0.0323, $wR_2$ = 0.0831                                |
| Final R indexes [all data]                  | $R_1$ = 0.0339, $wR_2$ = 0.0846                                |
| Largest diff. peak/hole / e Å <sup>-3</sup> | 0.13/-0.12                                                     |
| Flack parameter                             | 0.06(17)                                                       |

## VI. Copies of NMR spectra of 3aa-3ap

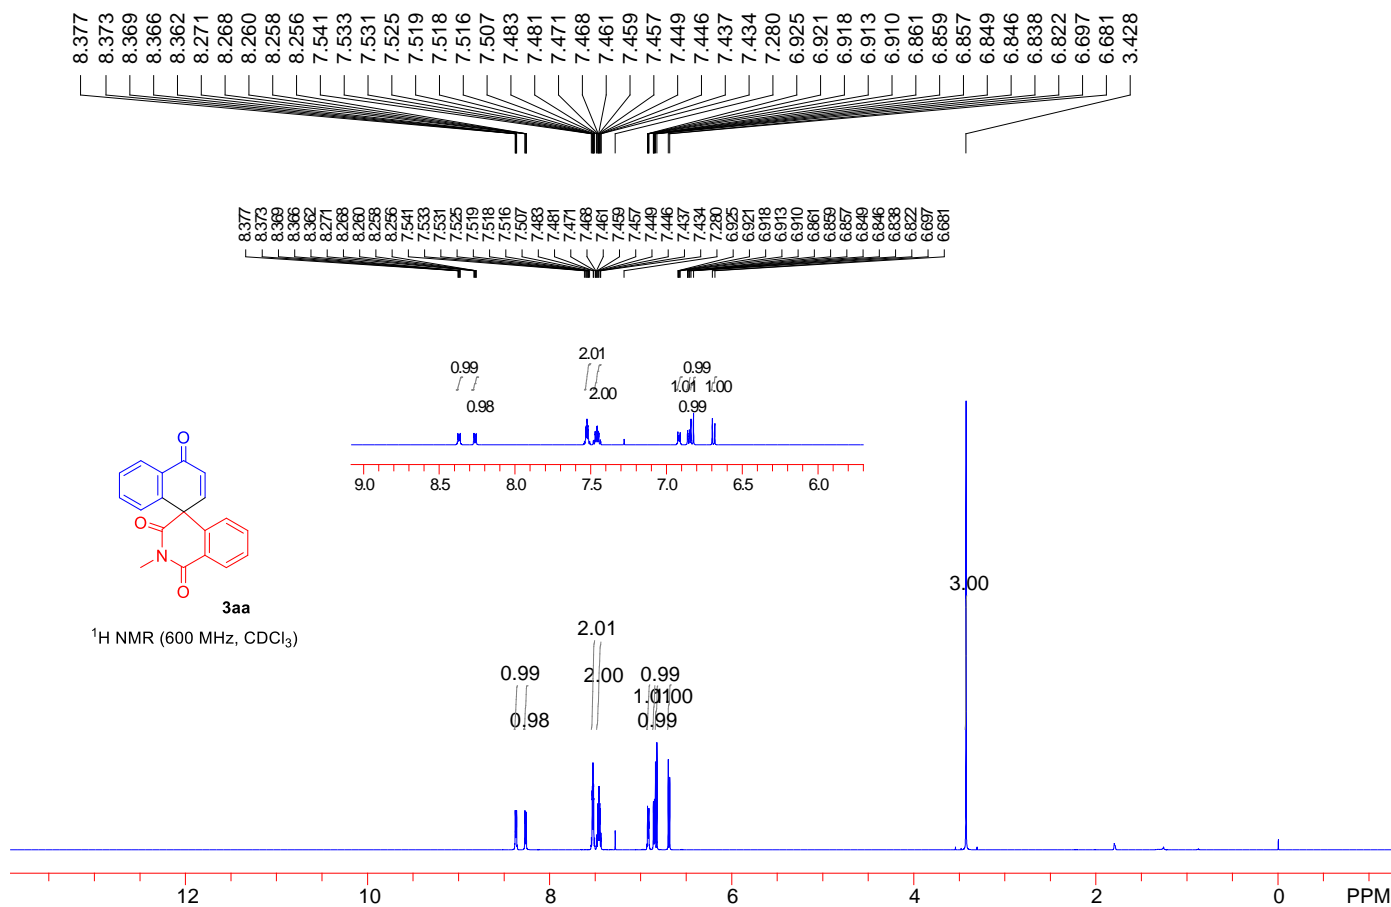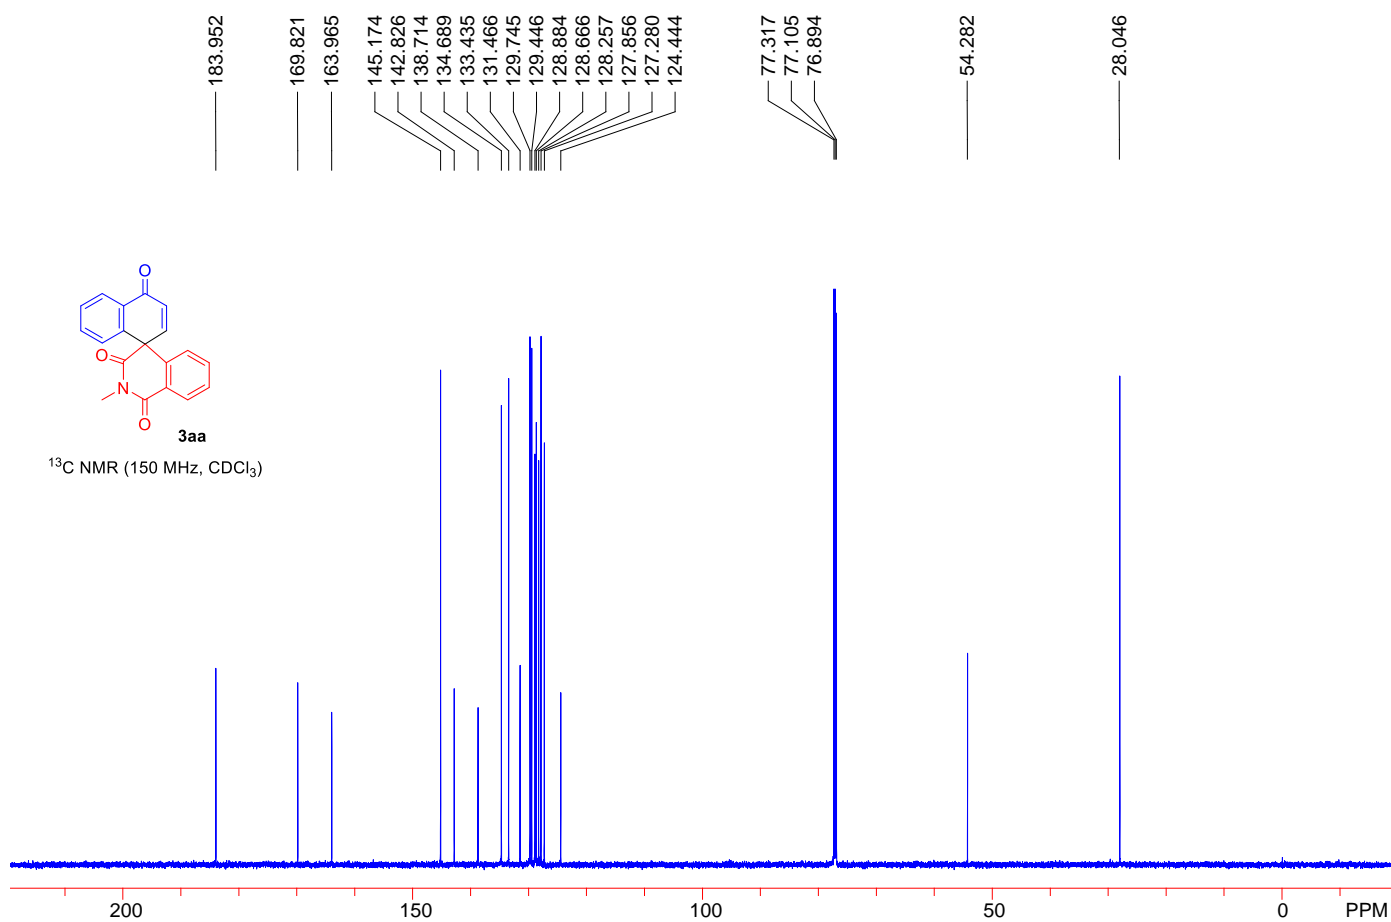



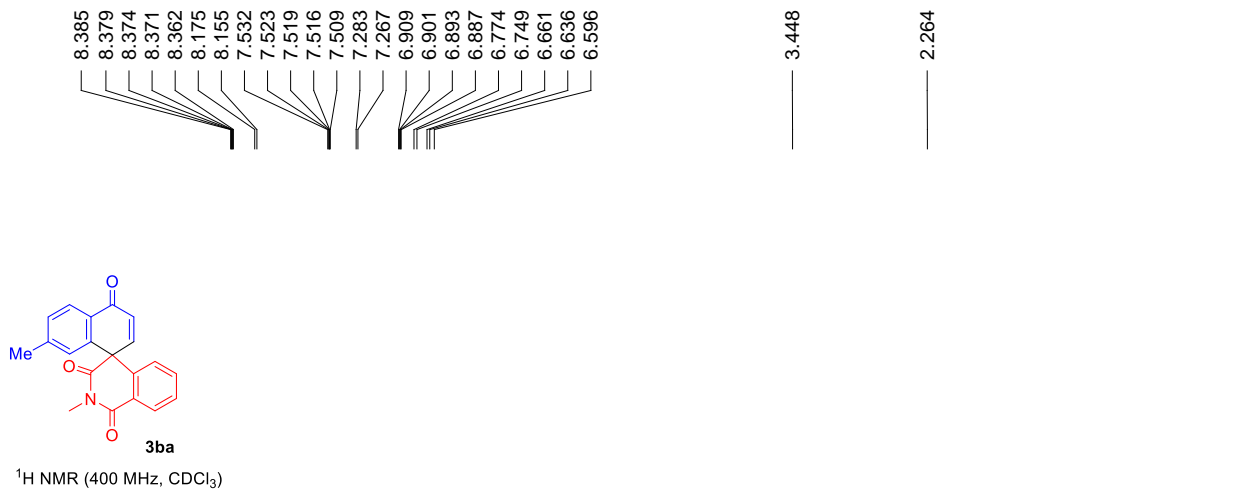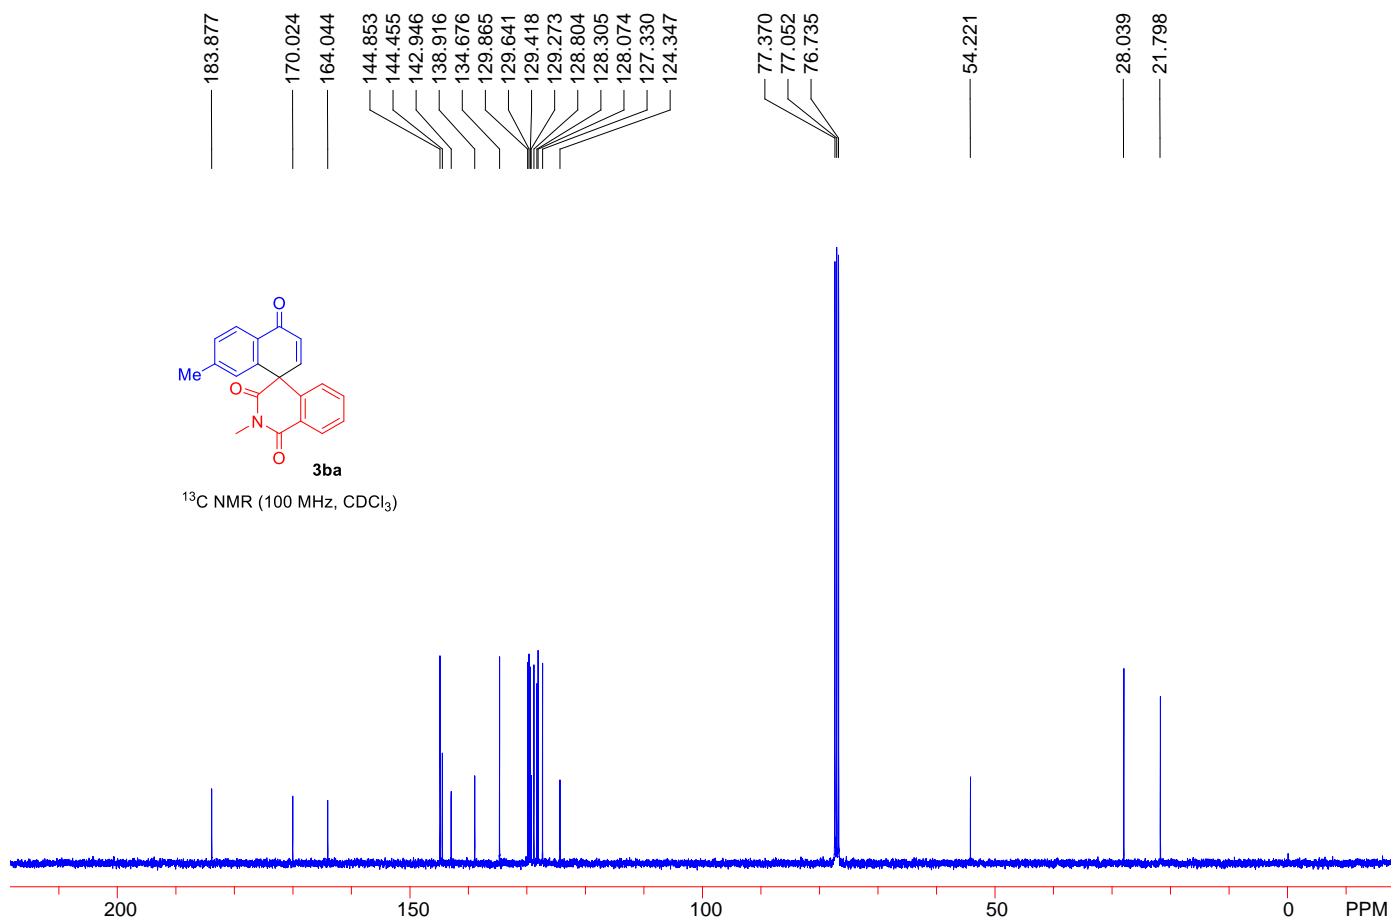

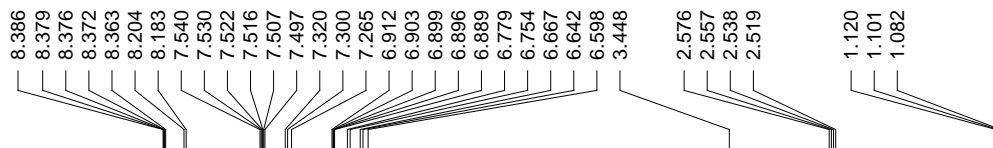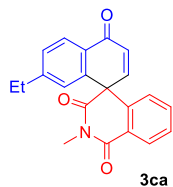

<sup>1</sup>H NMR (400 MHz, CDCl<sub>3</sub>)

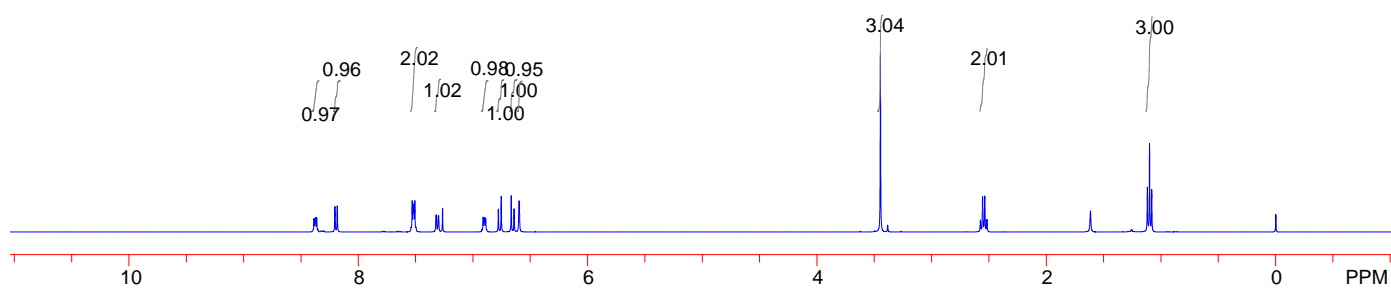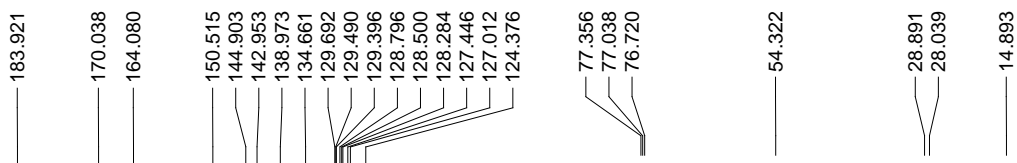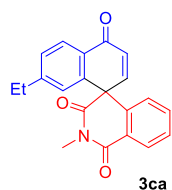

<sup>13</sup>C NMR (100 MHz, CDCl<sub>3</sub>)

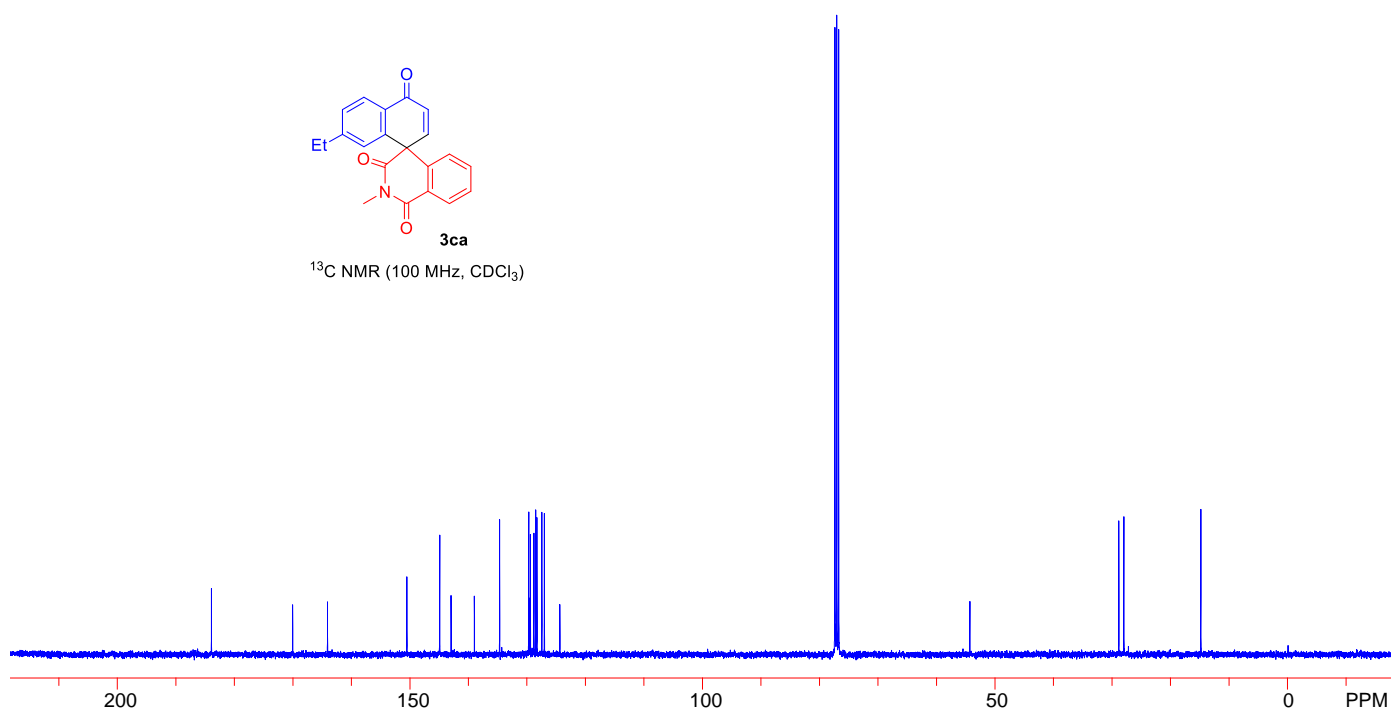

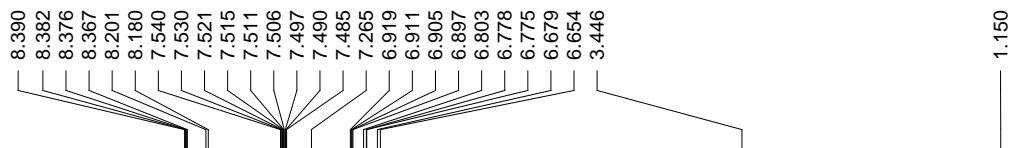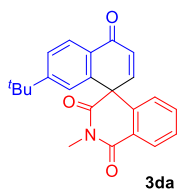

<sup>1</sup>H NMR (400 MHz, CDCl<sub>3</sub>)

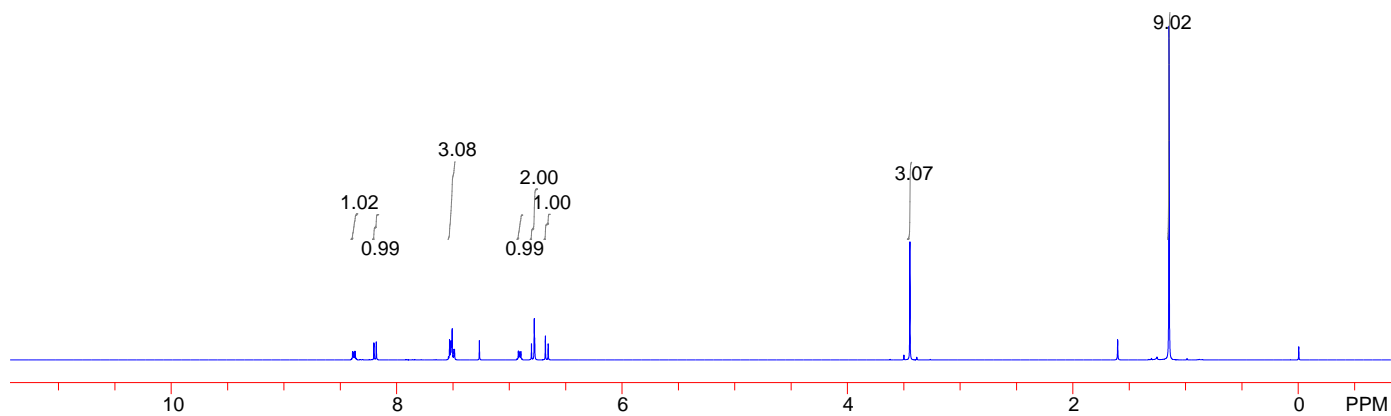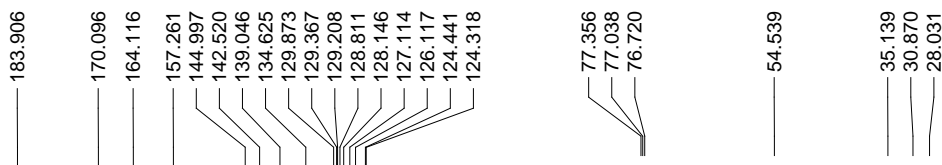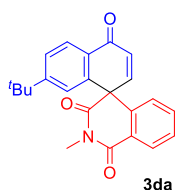

<sup>13</sup>C NMR (100 MHz, CDCl<sub>3</sub>)

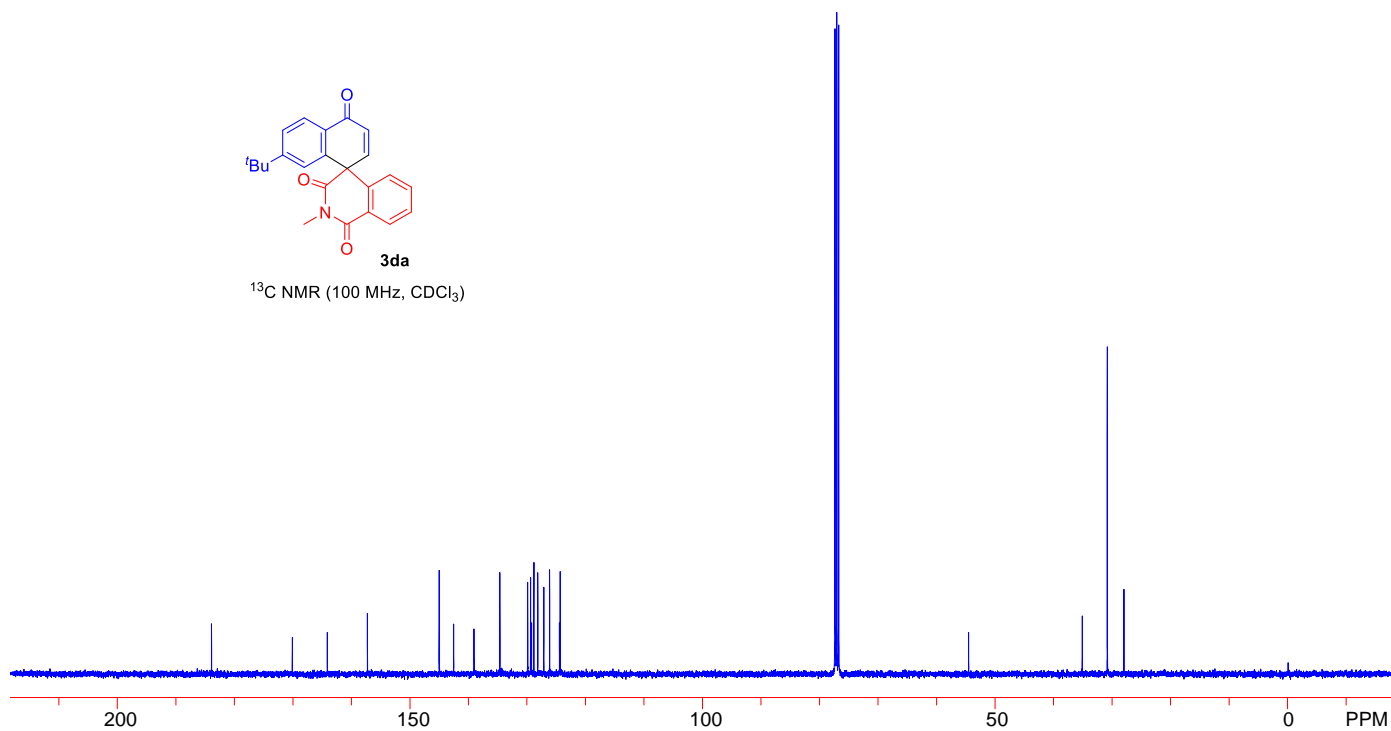

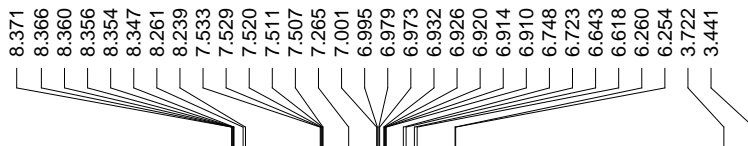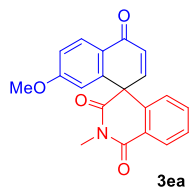

<sup>1</sup>H NMR (400 MHz, CDCl<sub>3</sub>)

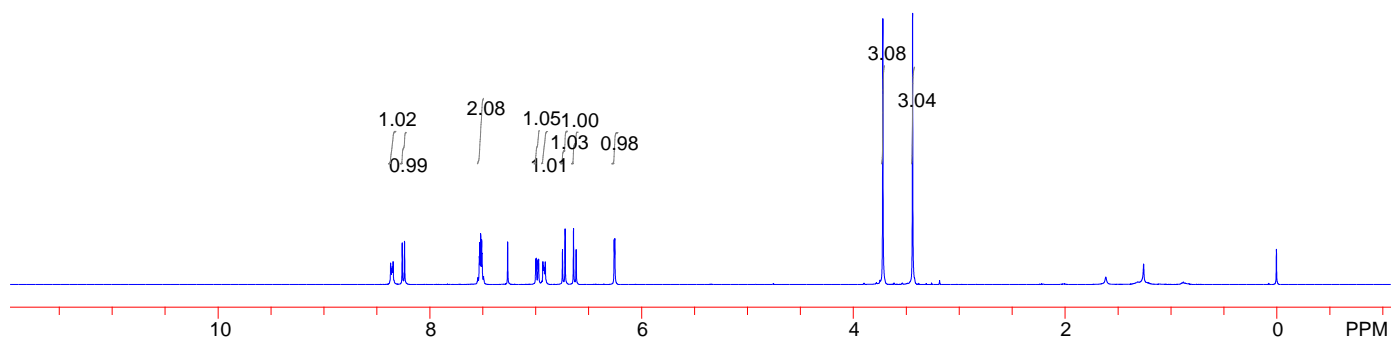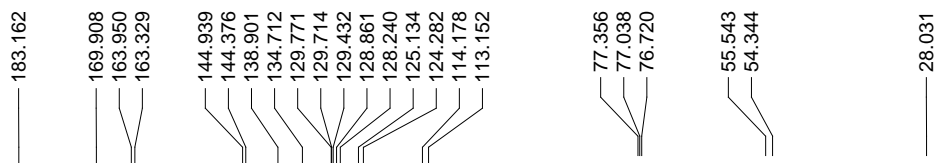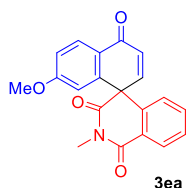

<sup>13</sup>C NMR (100 MHz, CDCl<sub>3</sub>)

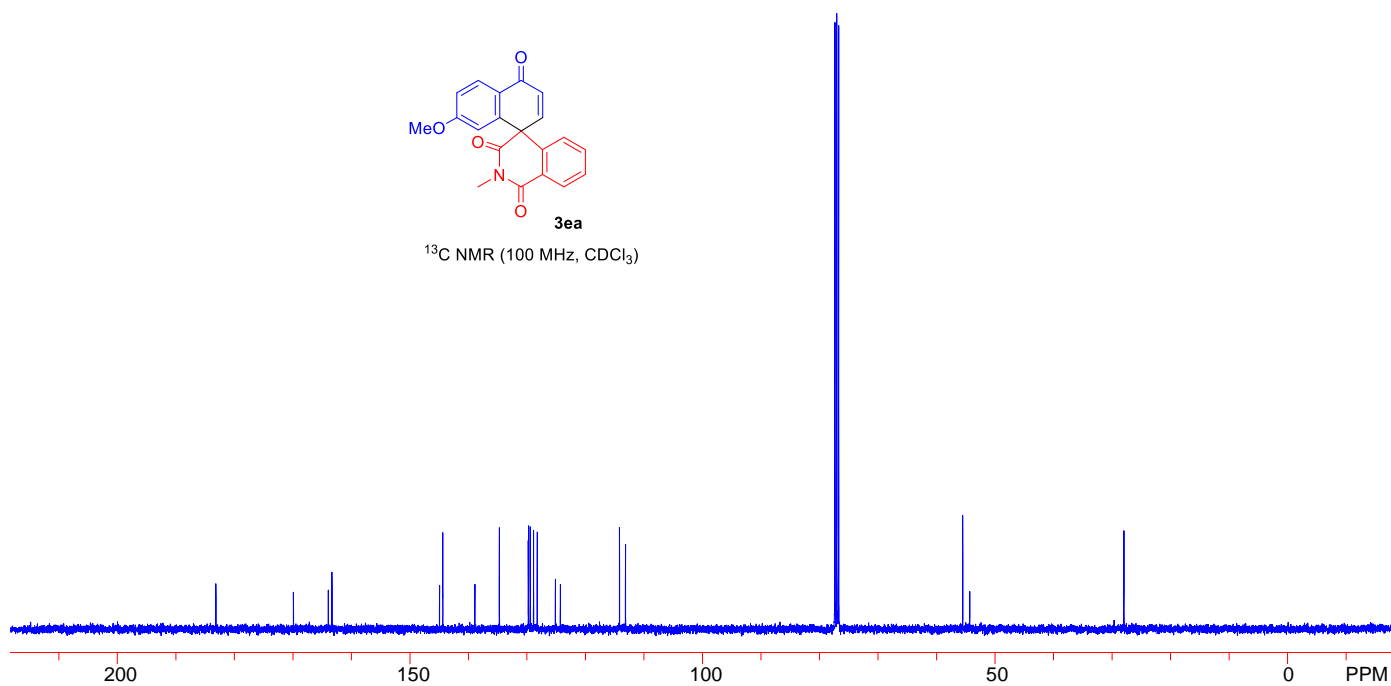

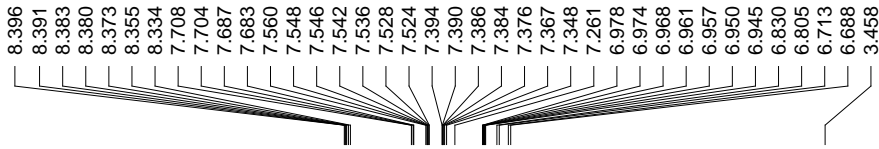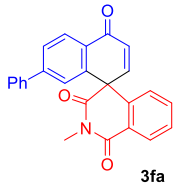

<sup>1</sup>H NMR (400 MHz, CDCl<sub>3</sub>)

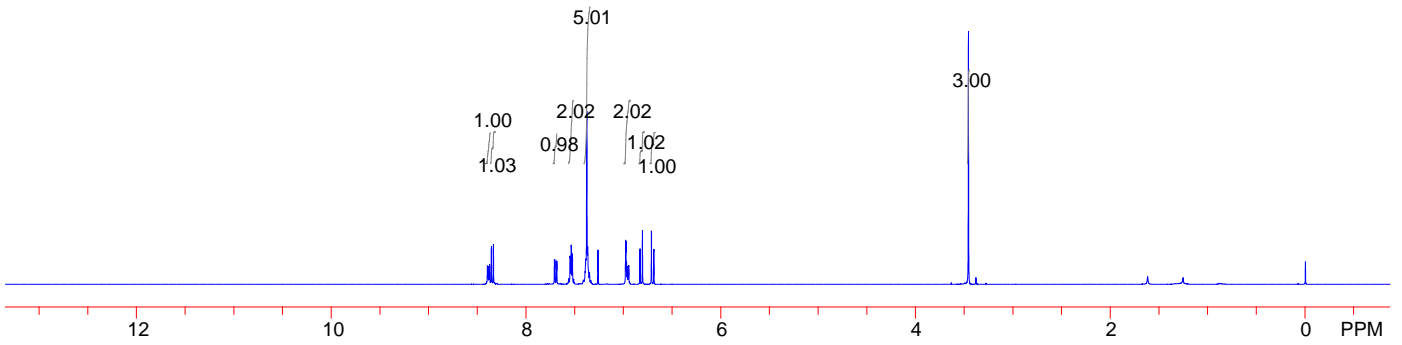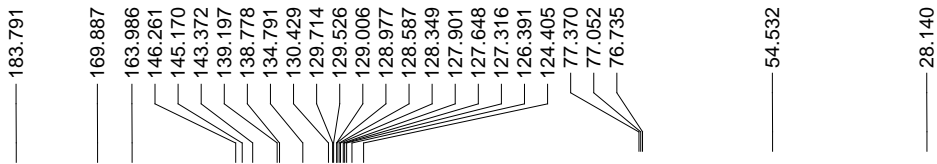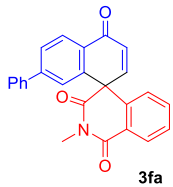

<sup>13</sup>C NMR (100 MHz, CDCl<sub>3</sub>)

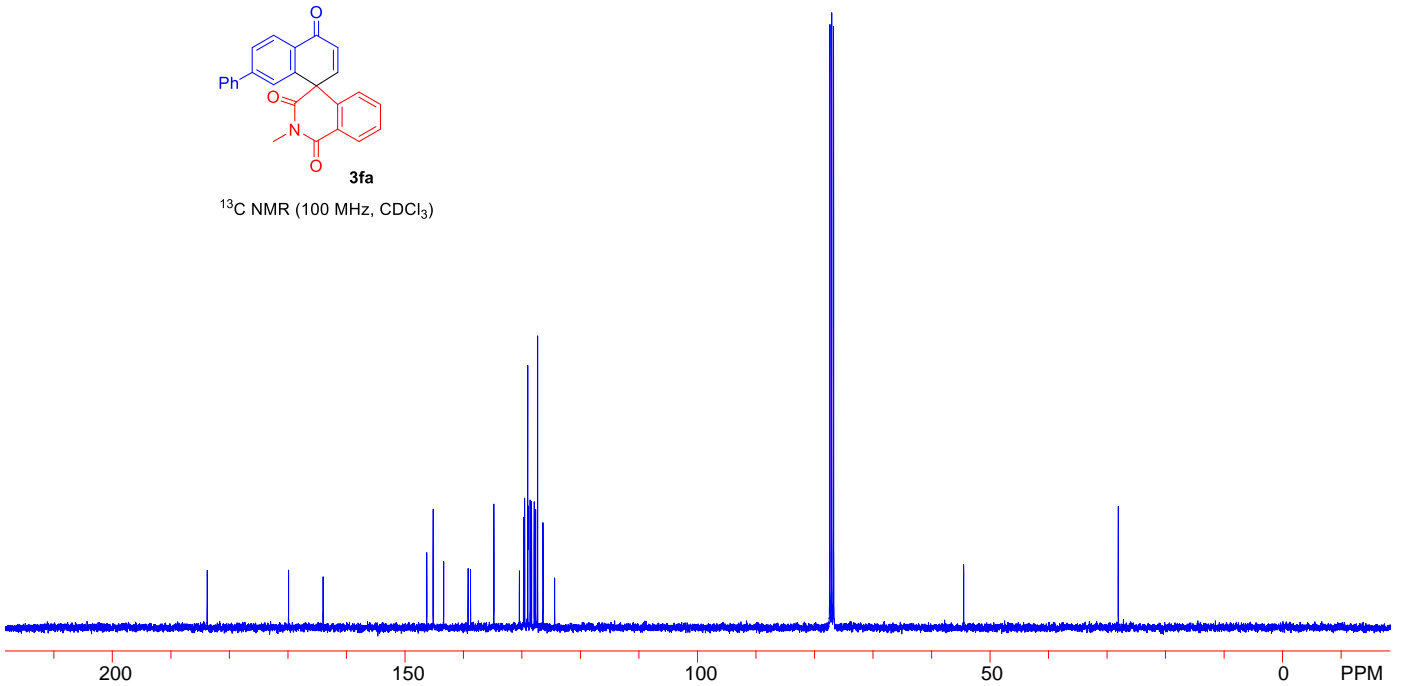

8.393  
8.389  
8.384  
8.382  
8.377  
8.322  
8.313  
8.308  
8.298  
7.560  
7.556  
7.554  
7.552  
7.548  
7.545  
7.266  
7.185  
7.181  
7.171  
7.167  
7.157  
7.153  
6.916  
6.911  
6.909  
6.904  
6.901  
6.805  
6.788  
6.678  
6.661  
6.521  
6.517  
6.506  
6.502  
3.444

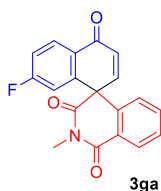

<sup>1</sup>H NMR (600 MHz, CDCl<sub>3</sub>)

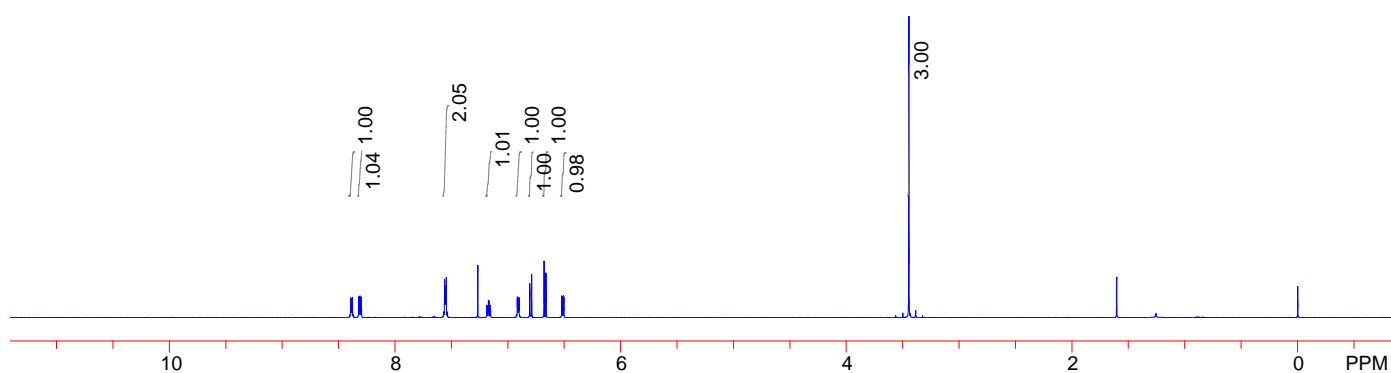

182.705  
169.325  
166.233  
164.534  
163.674  
145.415  
145.357  
145.007  
138.087  
134.856  
130.452  
130.387  
129.679  
129.541  
129.205  
128.294  
128.272  
128.170  
124.342  
116.802  
116.656  
114.665  
114.512  
77.251  
77.040  
76.828  
54.435  
54.421  
28.134

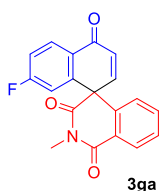

<sup>13</sup>C NMR (150 MHz, CDCl<sub>3</sub>)

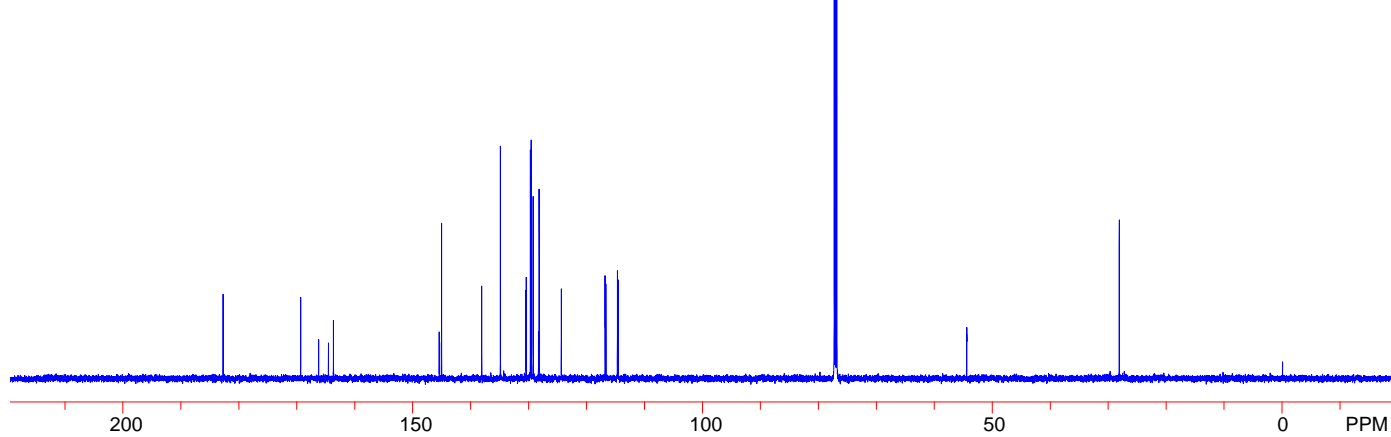

103.068  
103.090  
103.109  
103.131

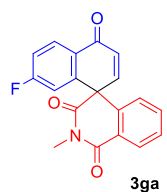

<sup>19</sup>F NMR (376 MHz, CDCl<sub>3</sub>)

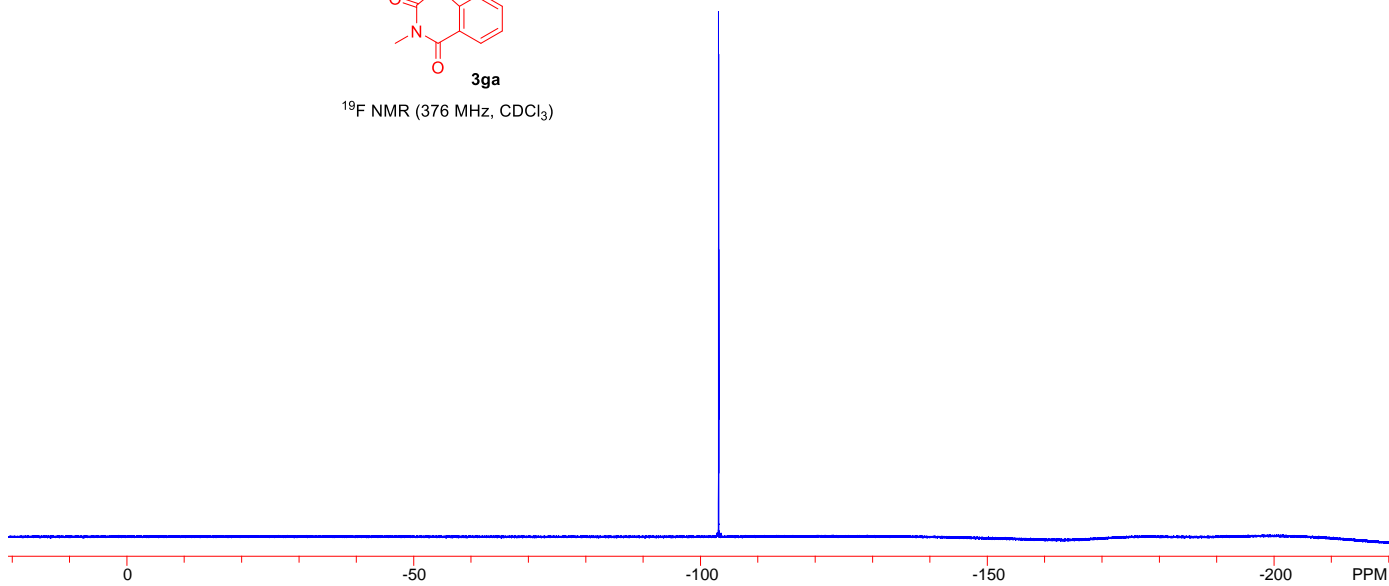

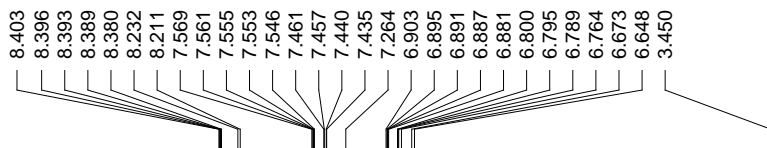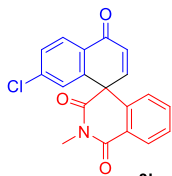

<sup>1</sup>H NMR (400 MHz, CDCl<sub>3</sub>)

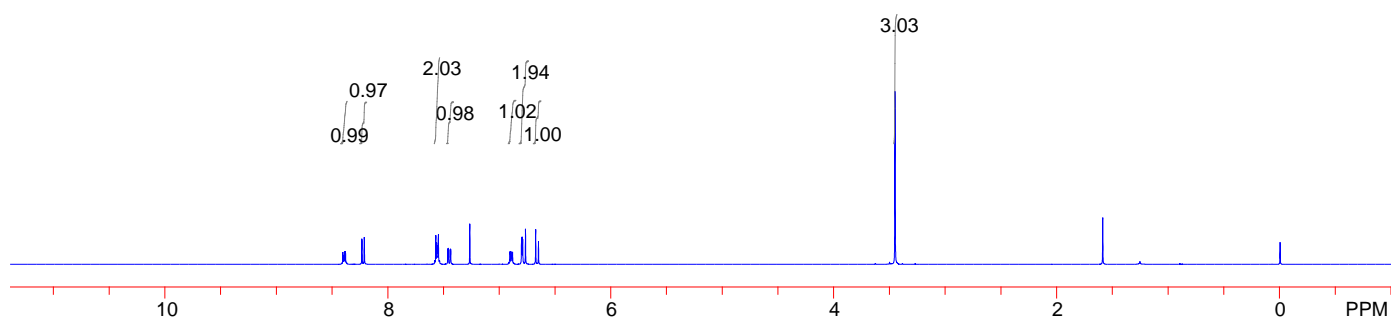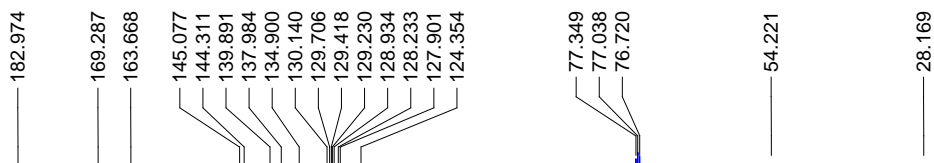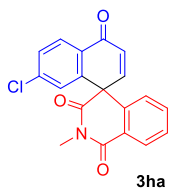

<sup>13</sup>C NMR (100 MHz, CDCl<sub>3</sub>)

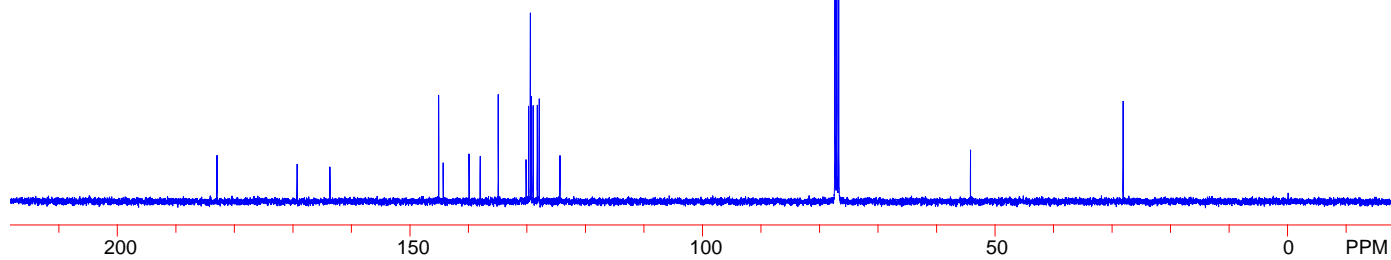



8.403  
8.389  
8.380  
8.149  
8.128  
7.627  
7.623  
7.606  
7.602  
7.571  
7.562  
7.557  
7.554  
7.547  
7.264  
6.960  
6.955  
6.899  
6.890  
6.876  
6.775  
6.750  
6.666  
6.641

3.451

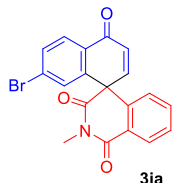

<sup>1</sup>H NMR (400 MHz, CDCl<sub>3</sub>)

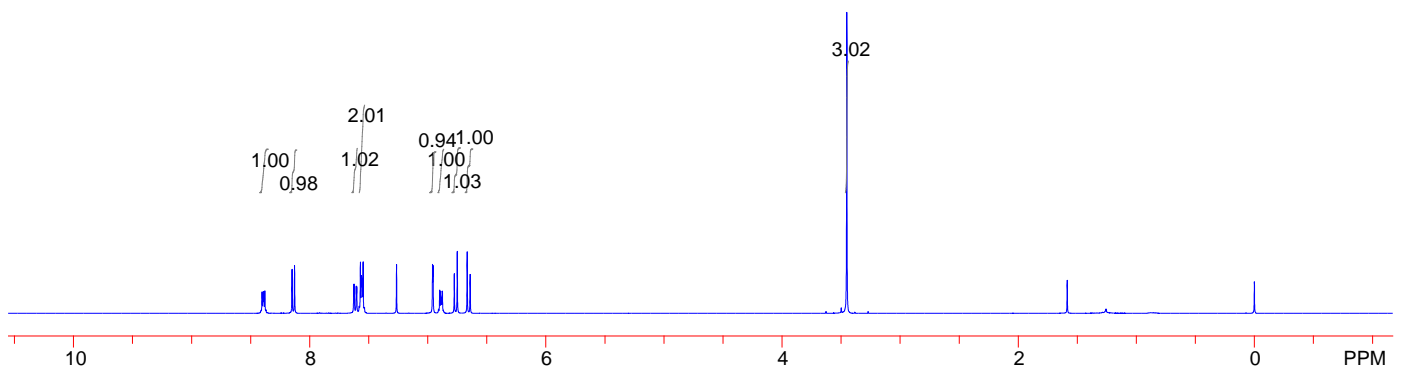

183.126

169.280

163.654

145.105

144.390

137.962

134.907

132.343

130.877

130.552

129.706

129.324

129.230

128.941

128.565

128.255

124.354

77.377

77.060

76.742

54.171

28.176

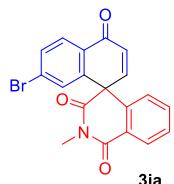

<sup>13</sup>C NMR (100 MHz, CDCl<sub>3</sub>)

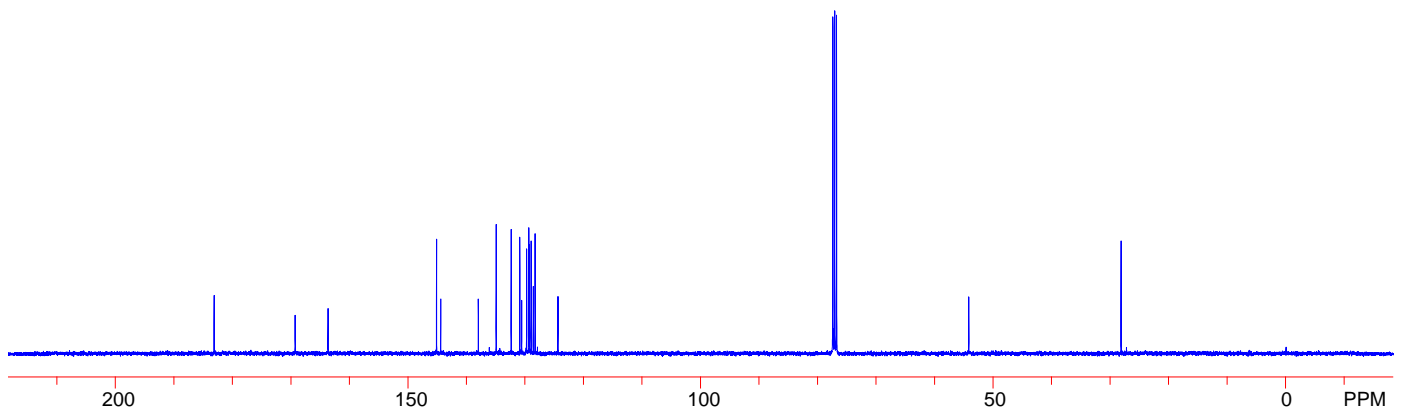

8.421  
8.416  
8.411  
8.399  
7.753  
7.732  
7.576  
7.566  
7.557  
7.554  
7.266  
7.065  
6.864  
6.860  
6.855  
6.842  
6.829  
6.707  
6.682

3.450

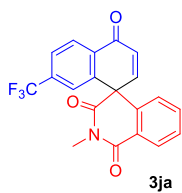

<sup>1</sup>H NMR (400 MHz, CDCl<sub>3</sub>)

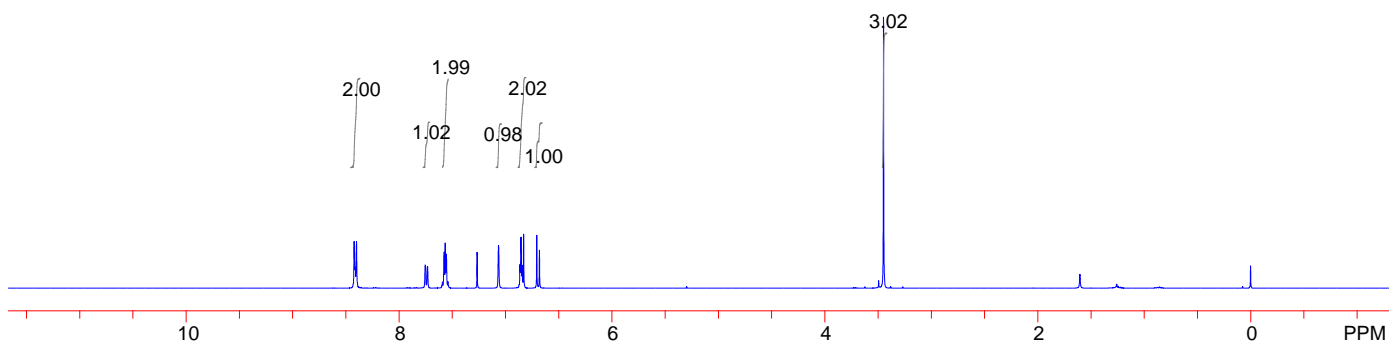

182.801  
169.179  
163.560  
145.900  
143.329  
137.745  
134.957  
134.611  
134.344  
129.851  
129.389  
129.230  
128.154  
128.081  
125.626  
125.597  
125.561  
125.524  
125.163  
125.127  
125.084  
125.048  
124.484  
124.412  
121.896  
77.356  
77.038  
76.720  
54.611  
28.226

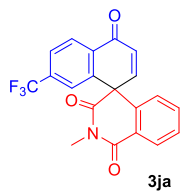

<sup>13</sup>C NMR (100 MHz, CDCl<sub>3</sub>)

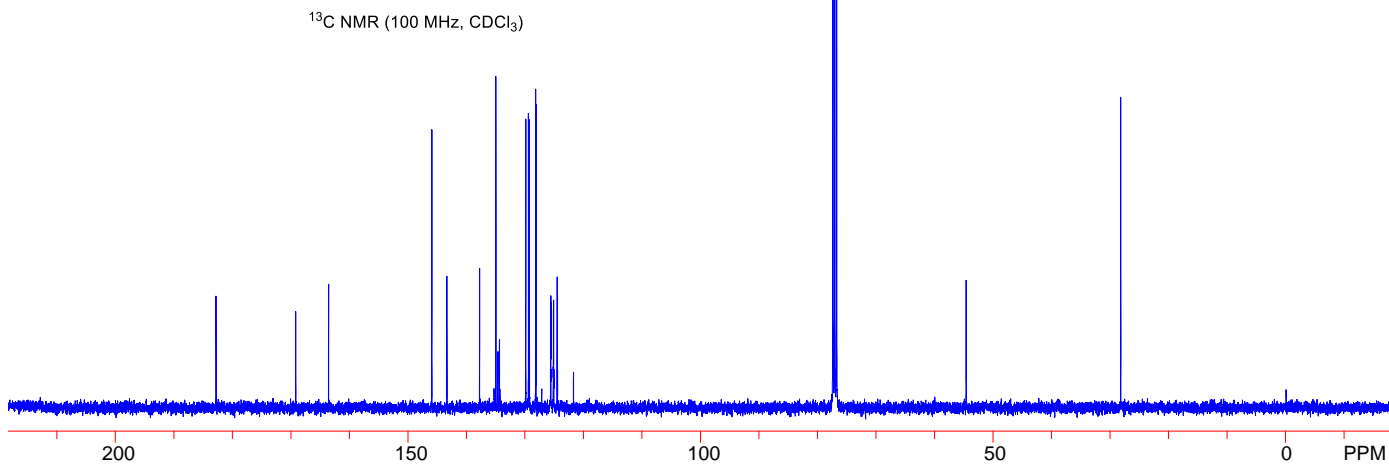

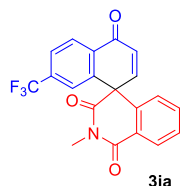

$^{19}\text{F}$  NMR (376 MHz,  $\text{CDCl}_3$ )

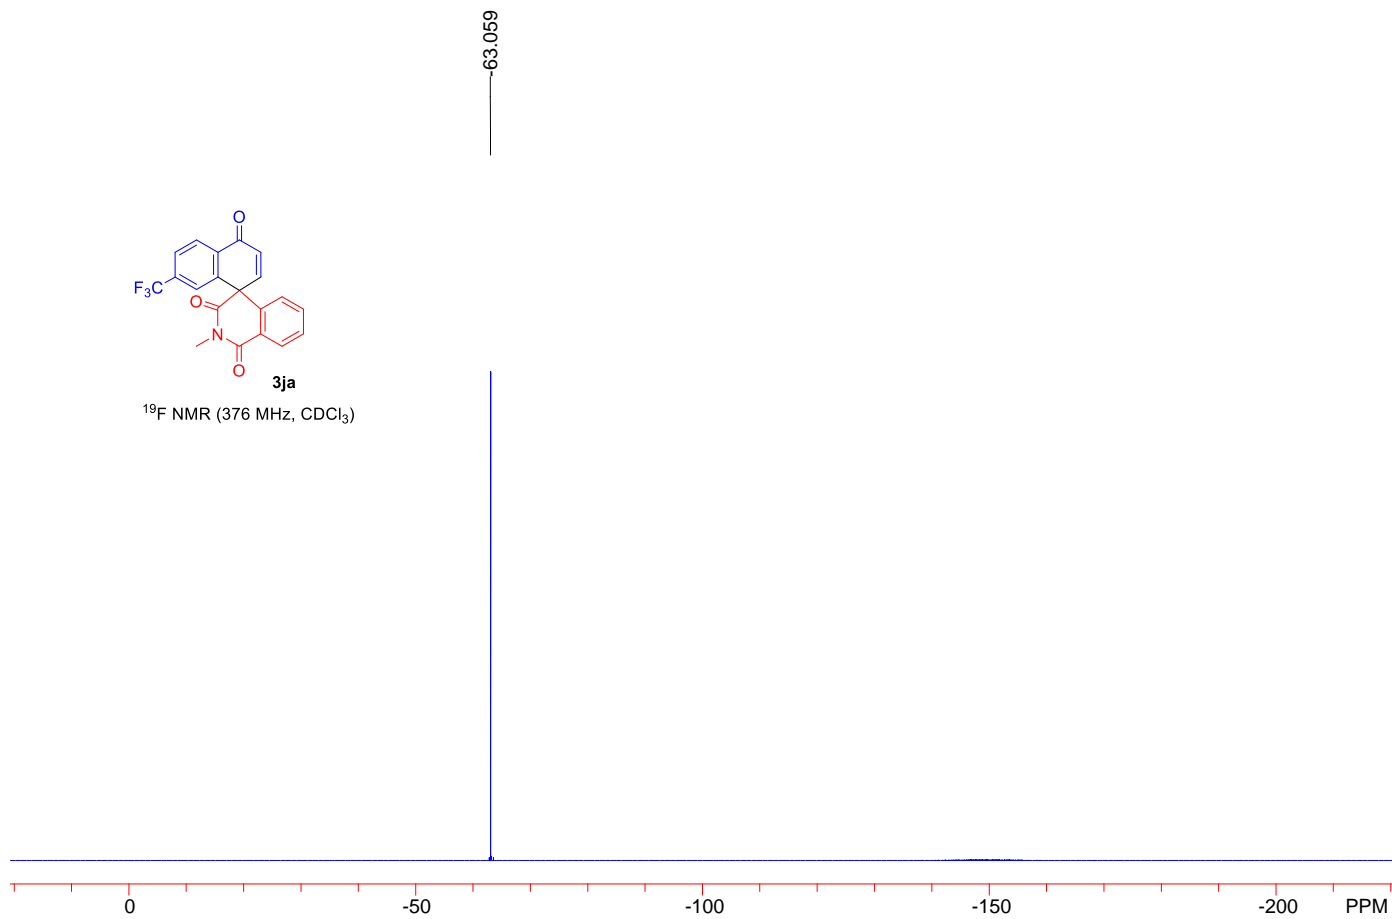

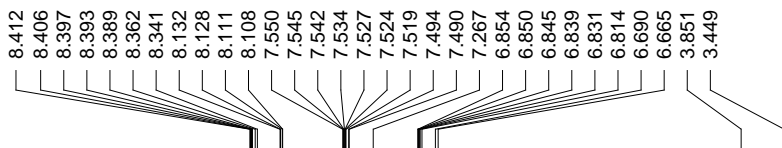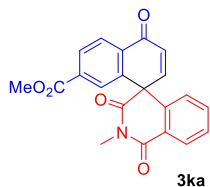

<sup>1</sup>H NMR (400 MHz, CDCl<sub>3</sub>)

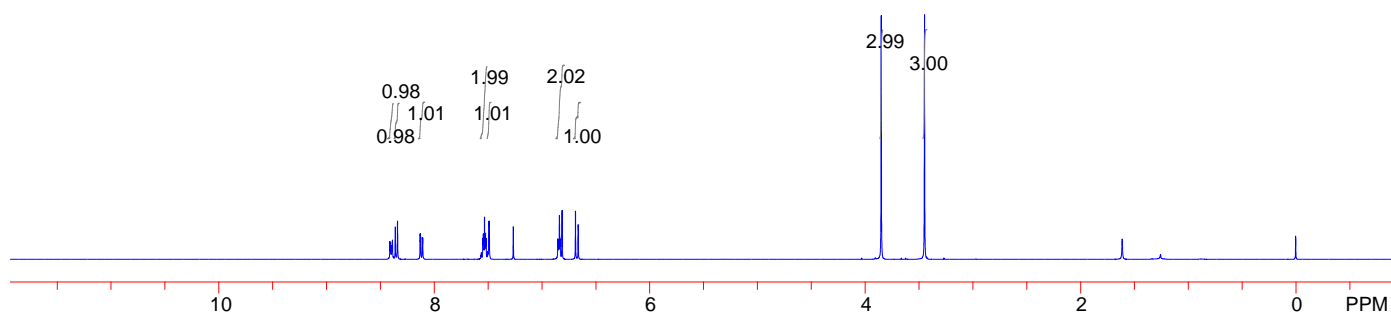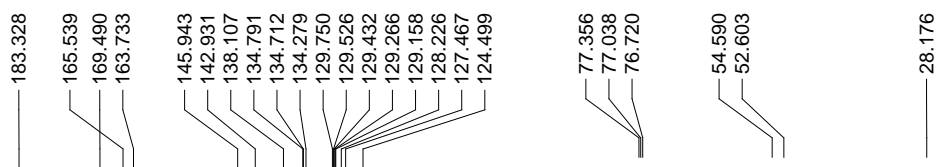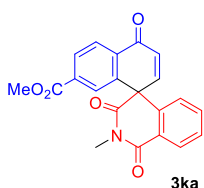

<sup>13</sup>C NMR (100 MHz, CDCl<sub>3</sub>)

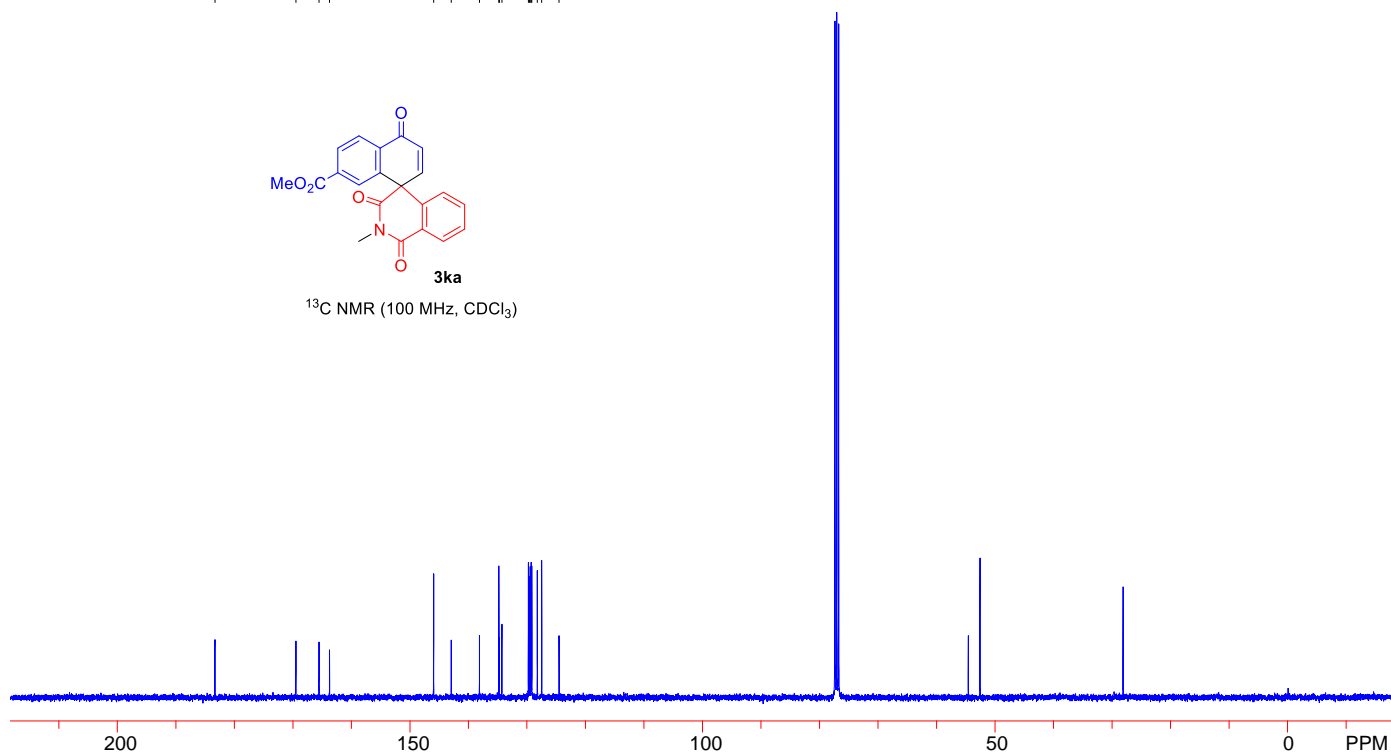

8.480  
8.458  
8.443  
8.438  
8.427  
8.424  
8.420  
8.320  
8.315  
8.299  
8.294  
7.696  
7.691  
7.617  
7.614  
7.599  
7.595  
7.587  
7.582  
7.577  
7.569  
7.565  
7.551  
7.546  
7.267  
6.898  
6.873  
6.861  
6.843  
6.839  
6.726  
6.701  
3.456

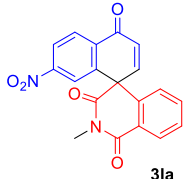

<sup>1</sup>H NMR (400 MHz, CDCl<sub>3</sub>)

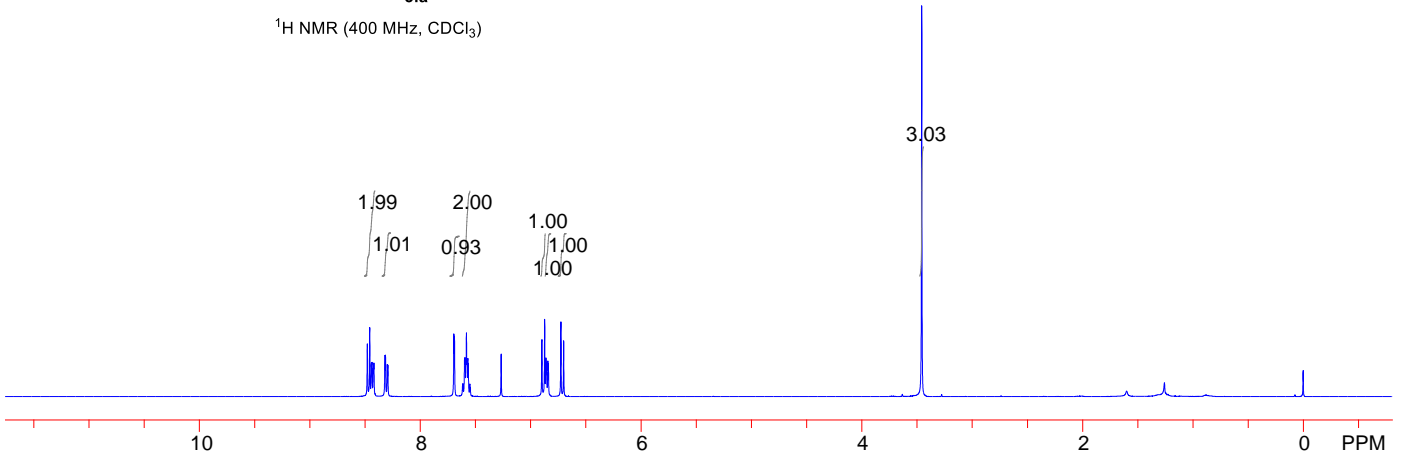

182.216  
168.854  
163.336  
146.290  
150.270  
144.109  
137.211  
135.947  
135.044  
130.089  
129.641  
129.172  
128.970  
128.081  
124.557  
123.625  
123.452  
77.356  
77.038  
76.727  
54.813  
28.313

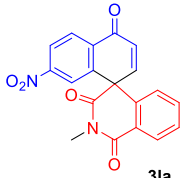

<sup>13</sup>C NMR (100 MHz, CDCl<sub>3</sub>)

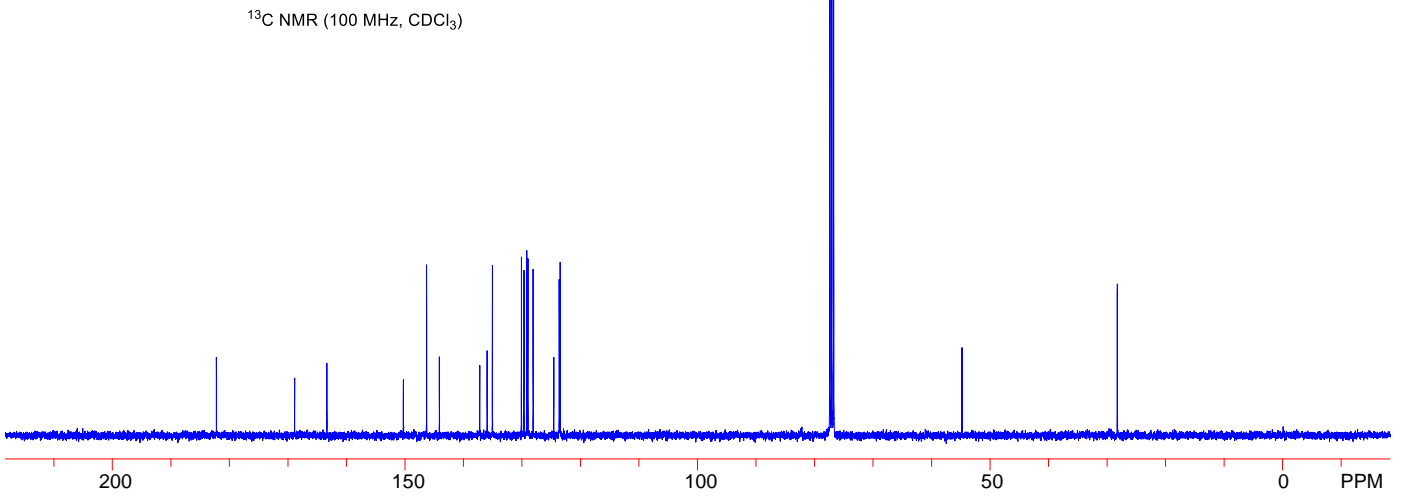

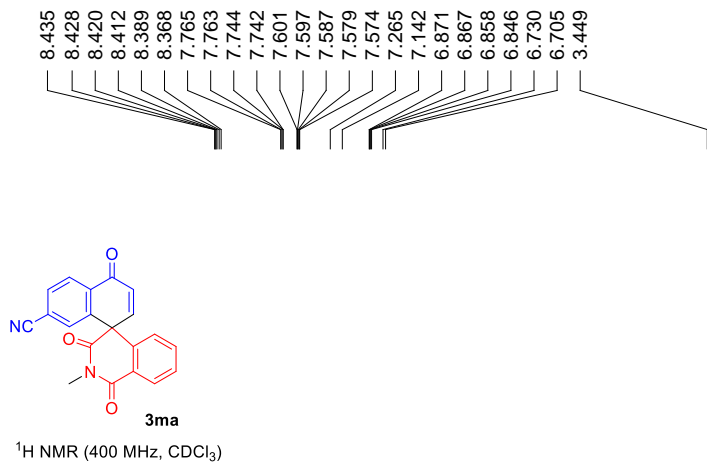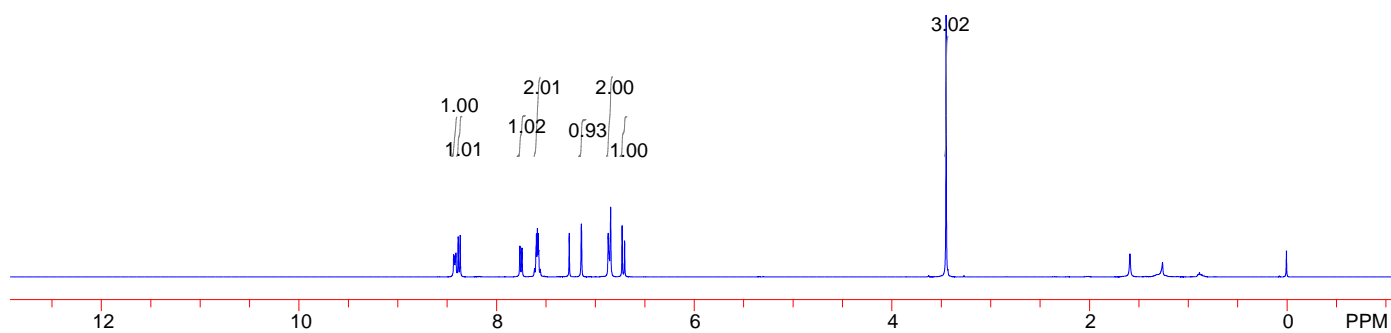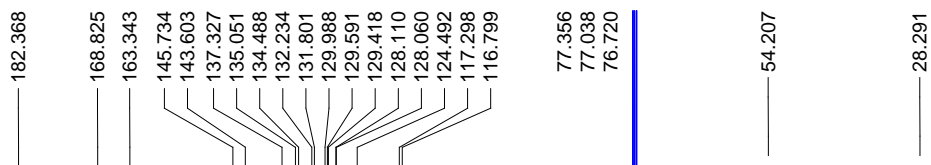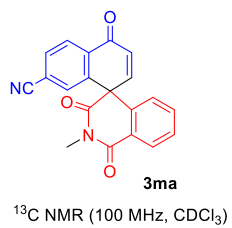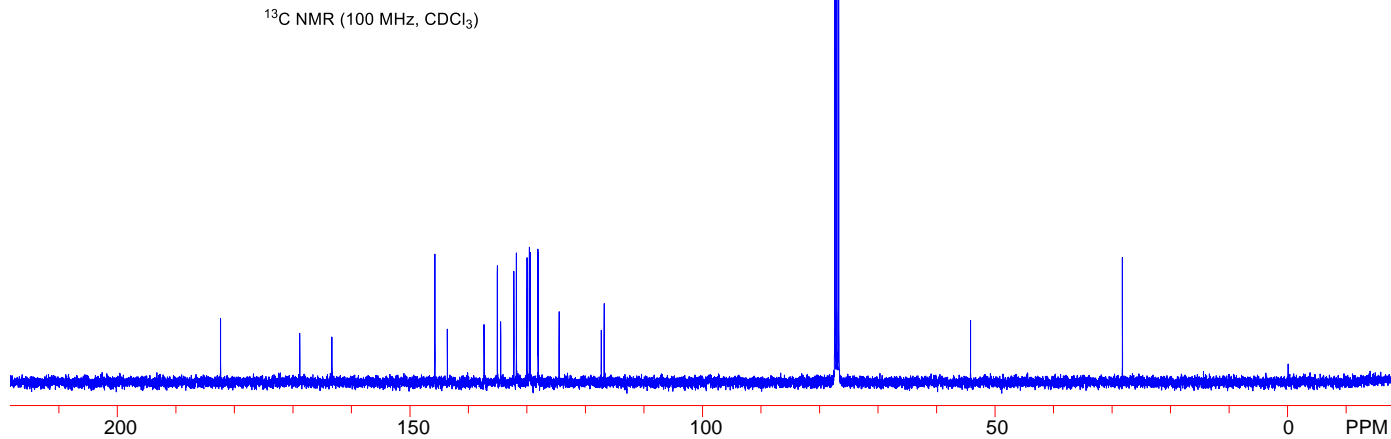

8.374  
8.367  
8.359  
8.351  
8.080  
7.522  
7.514  
7.509  
7.499  
7.267  
7.250  
6.918  
6.910  
6.902  
6.896  
6.815  
6.790  
6.742  
6.722  
6.693  
6.668

3.427

2.400

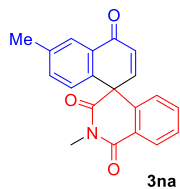

$^1\text{H NMR}$  (400 MHz,  $\text{CDCl}_3$ )

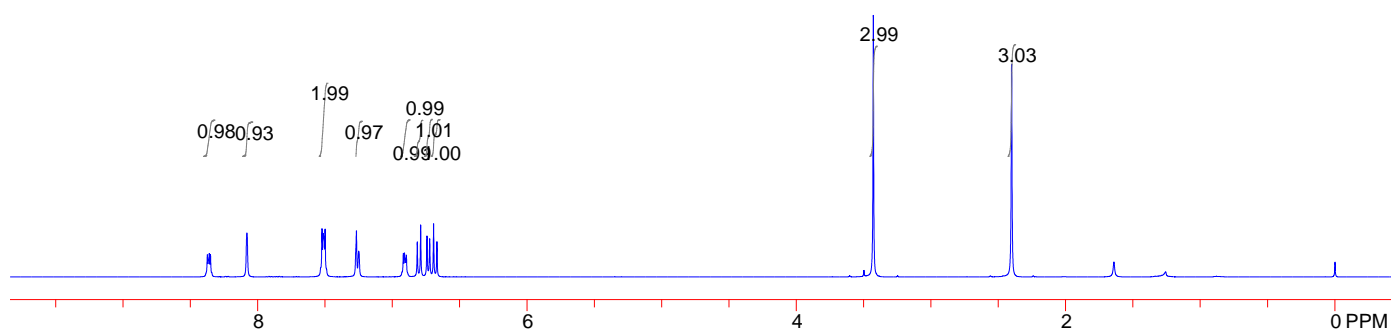

184.224

169.973

164.029

140.086

138.901

145.098

138.836

134.625

134.445

131.194

129.880

129.410

128.796

128.182

127.706

127.410

124.434

54.070

28.031

21.141

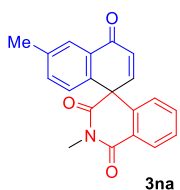

$^{13}\text{C NMR}$  (100 MHz,  $\text{CDCl}_3$ )

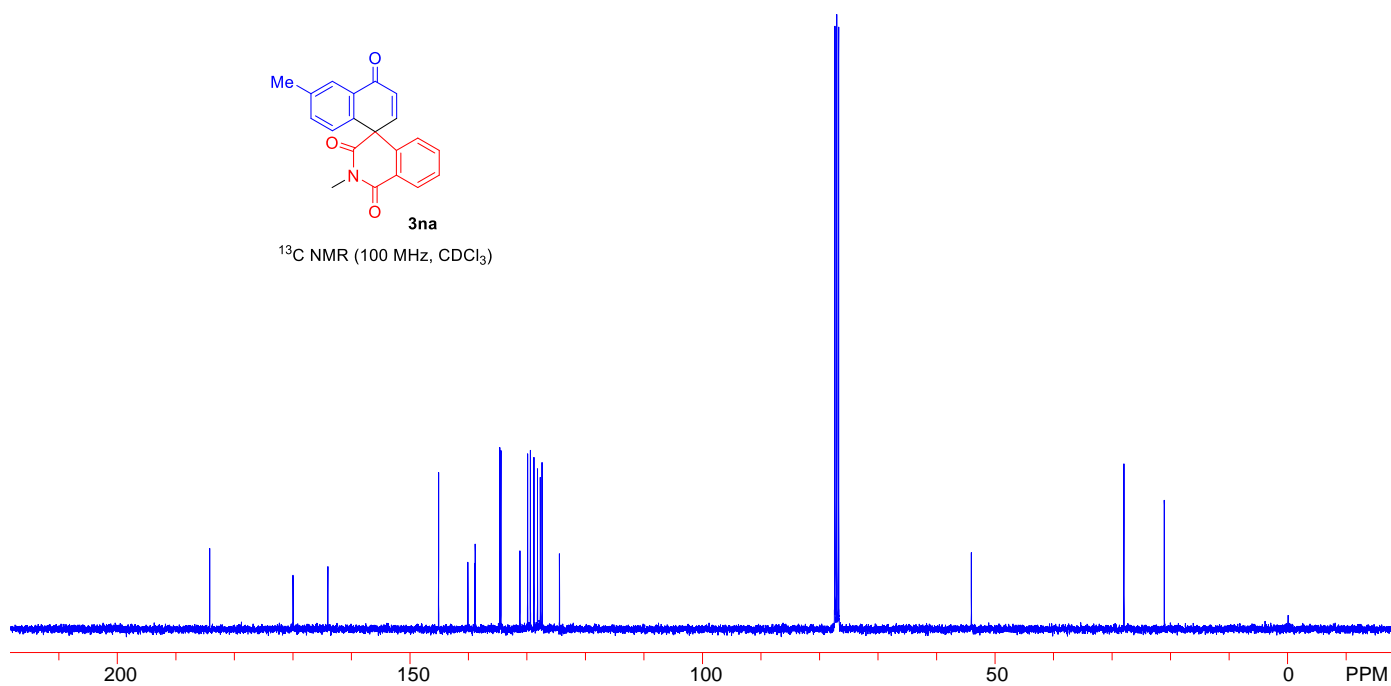

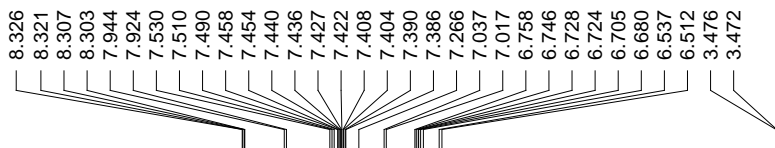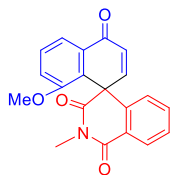

<sup>1</sup>H NMR (400 MHz, CDCl<sub>3</sub>)

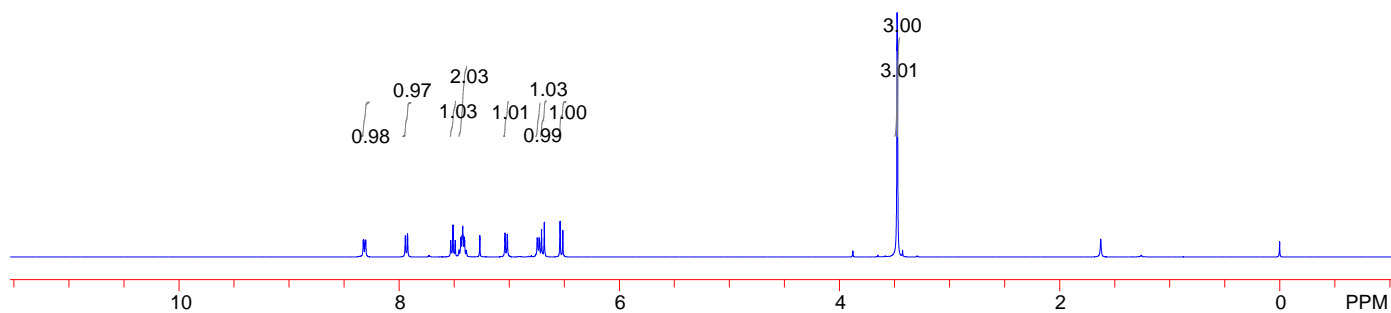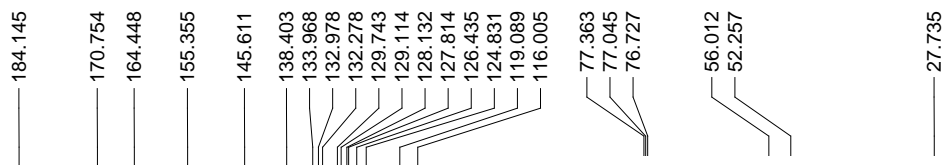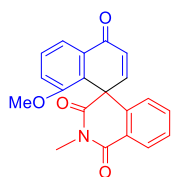

<sup>13</sup>C NMR (100 MHz, CDCl<sub>3</sub>)

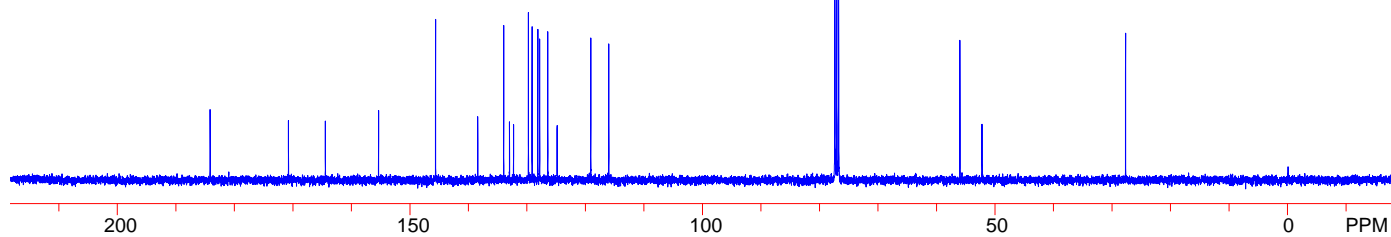



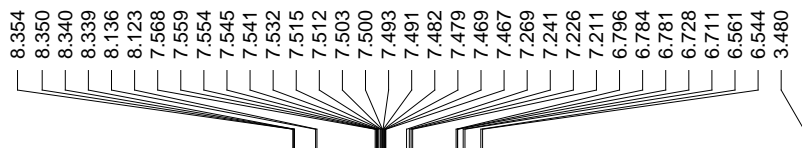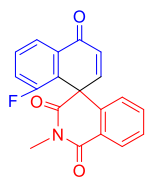

**3pa**

<sup>1</sup>H NMR (600 MHz, CDCl<sub>3</sub>)

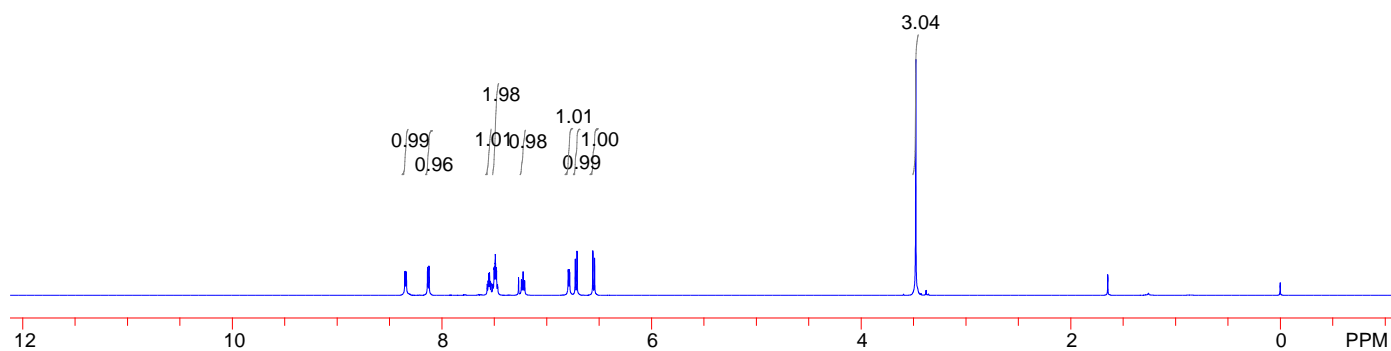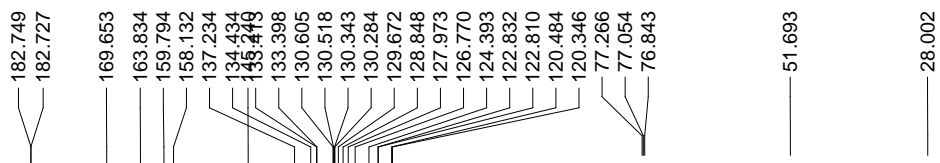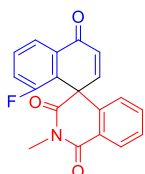

**3pa**

<sup>13</sup>C NMR (150 MHz, CDCl<sub>3</sub>)

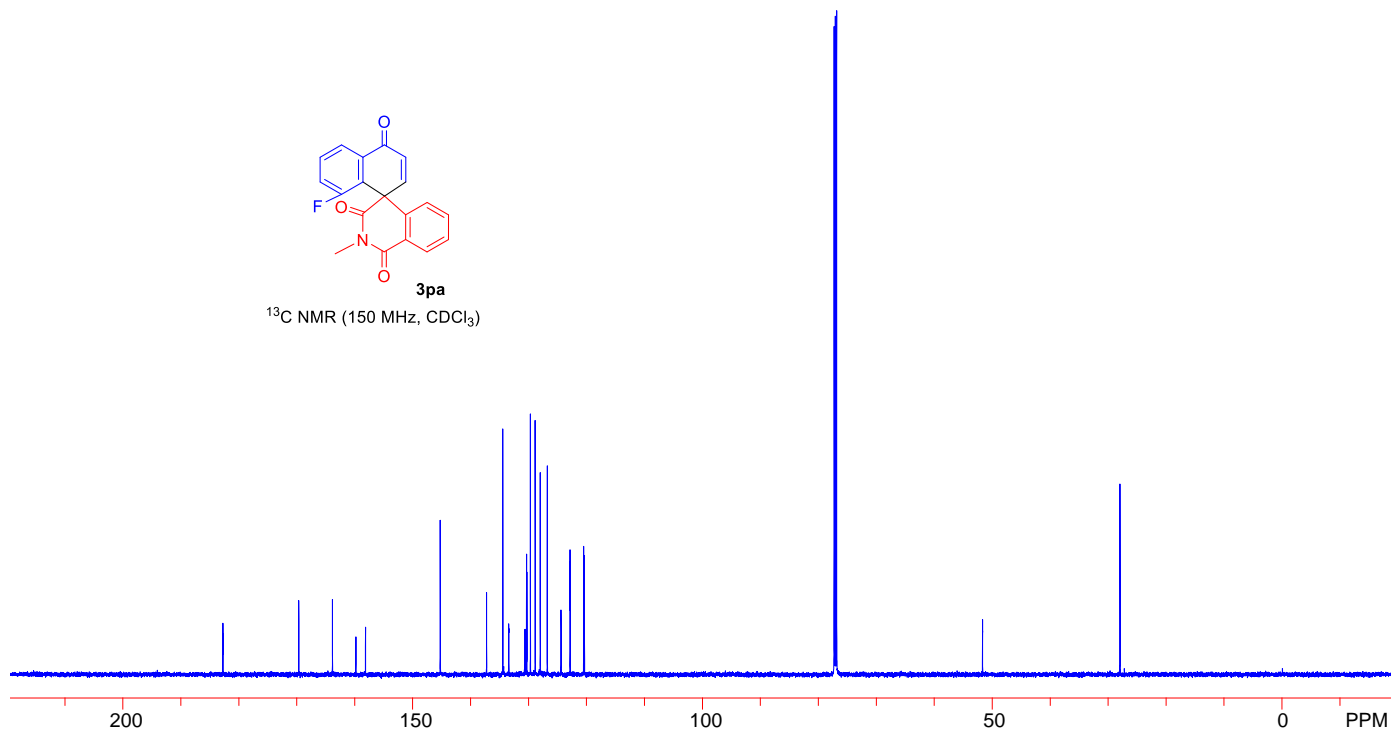

112.875  
112.890  
112.901  
112.916

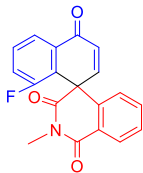

<sup>19</sup>F NMR (376 MHz, CDCl<sub>3</sub>)

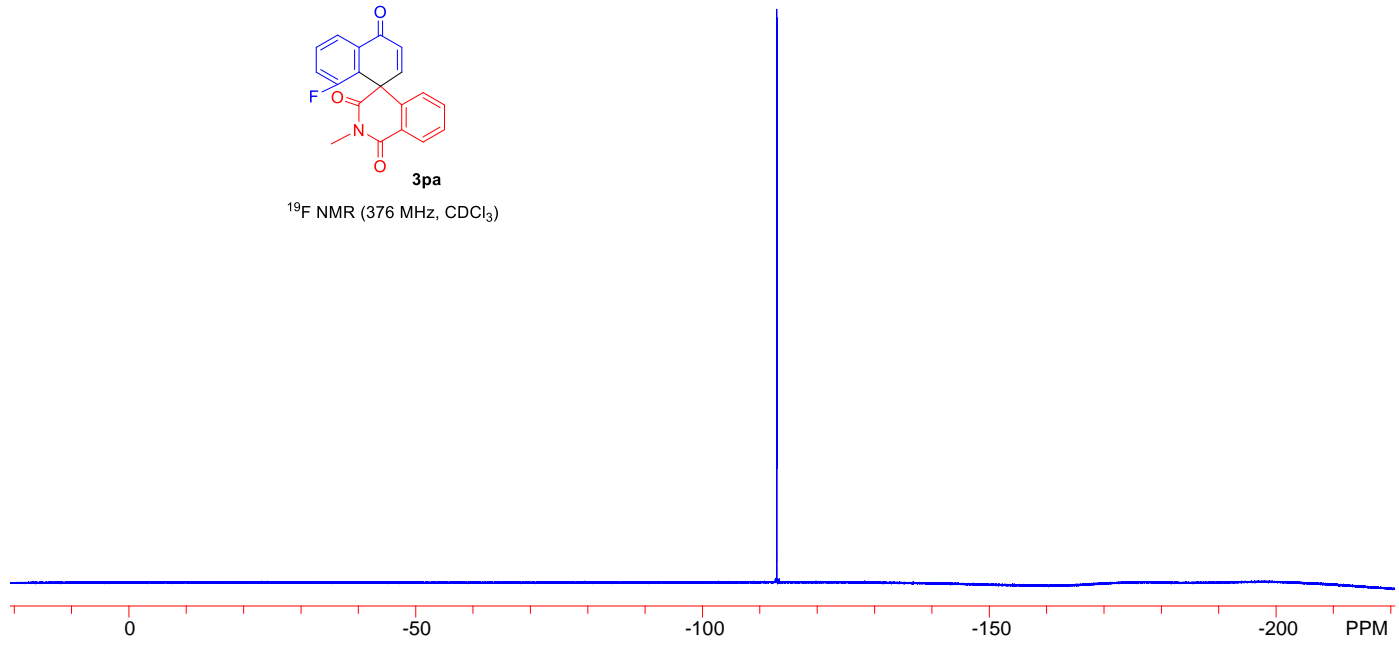

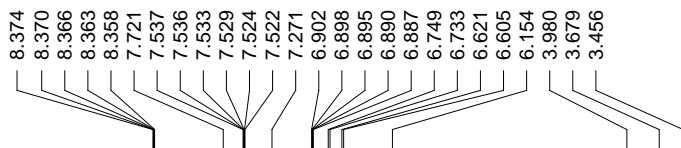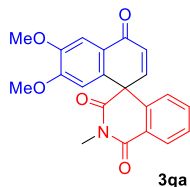

<sup>1</sup>H NMR (600 MHz, CDCl<sub>3</sub>)

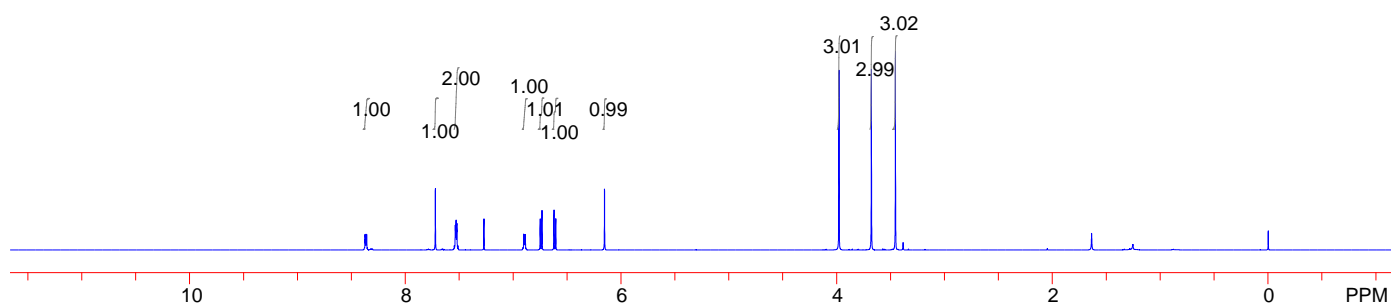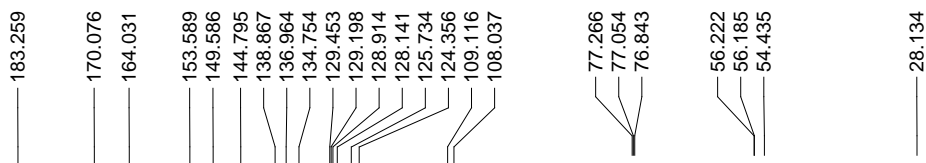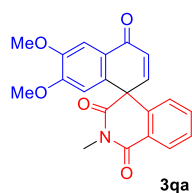

<sup>13</sup>C NMR (150 MHz, CDCl<sub>3</sub>)

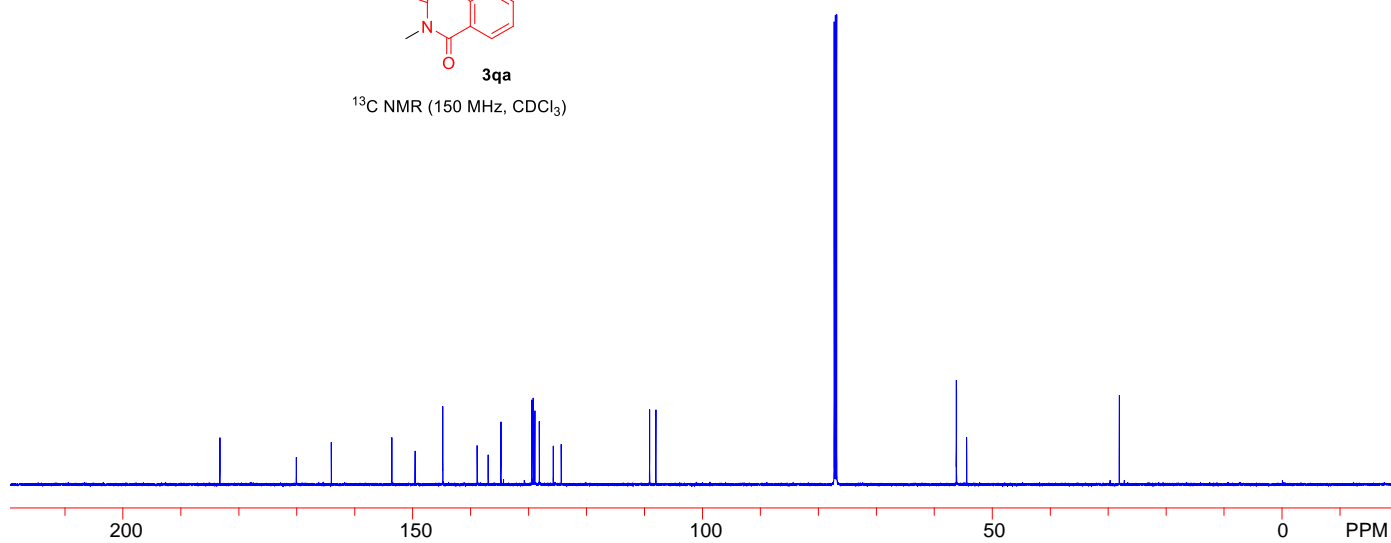

8.351  
8.345  
8.342  
8.340  
8.333  
8.328  
8.093  
8.071  
7.450  
7.442  
7.442  
7.433  
7.429  
7.263  
7.123  
7.101  
7.101  
6.792  
6.788  
6.781  
6.779  
6.776  
6.769  
6.649  
6.624  
6.483  
6.458  
3.881  
3.486  
3.183

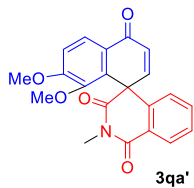

3qa:3qa' = 2.8:1

<sup>1</sup>H NMR (400 MHz, CDCl<sub>3</sub>)

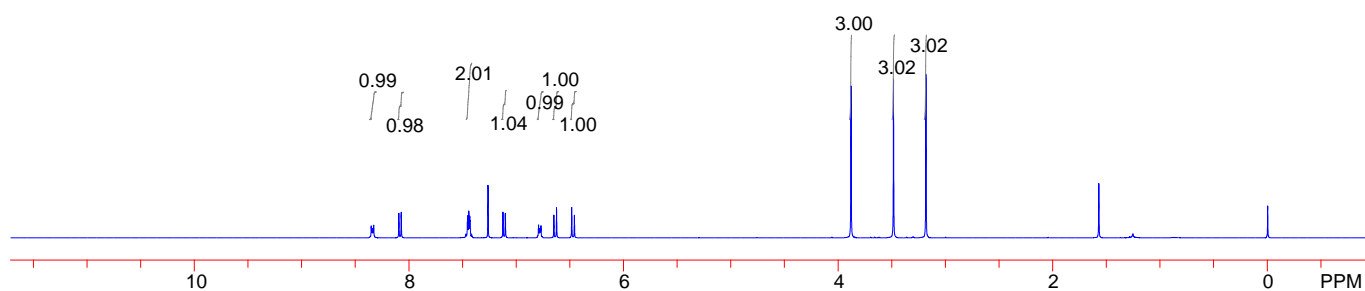

183.444  
170.739  
164.304  
156.611  
144.968  
144.246  
139.111  
137.420  
134.018  
129.280  
128.320  
127.872  
126.911  
125.546  
124.586  
123.589  
112.921  
77.341  
77.031  
76.773  
59.371  
55.817  
52.466  
27.844

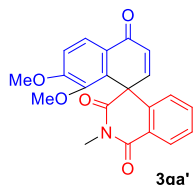

<sup>13</sup>C NMR (100 MHz, CDCl<sub>3</sub>)

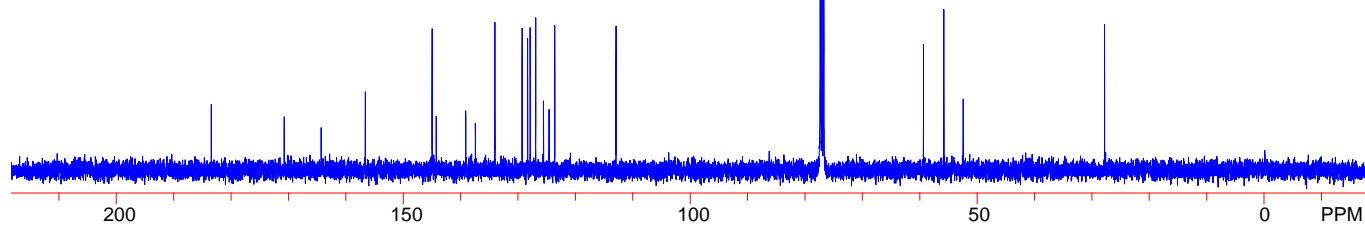

8.320  
8.315  
8.310  
8.305  
8.303  
8.297  
7.935  
7.915  
7.522  
7.509  
7.504  
7.496  
7.486  
7.482  
7.468  
7.263  
6.977  
6.956  
6.937  
6.931  
6.929  
6.924  
6.919  
6.914  
6.658  
6.633  
6.553  
6.528  
5.879  
5.876  
5.721  
5.718  
3.463

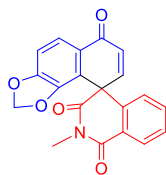

**3ra**

<sup>1</sup>H NMR (400 MHz, CDCl<sub>3</sub>)

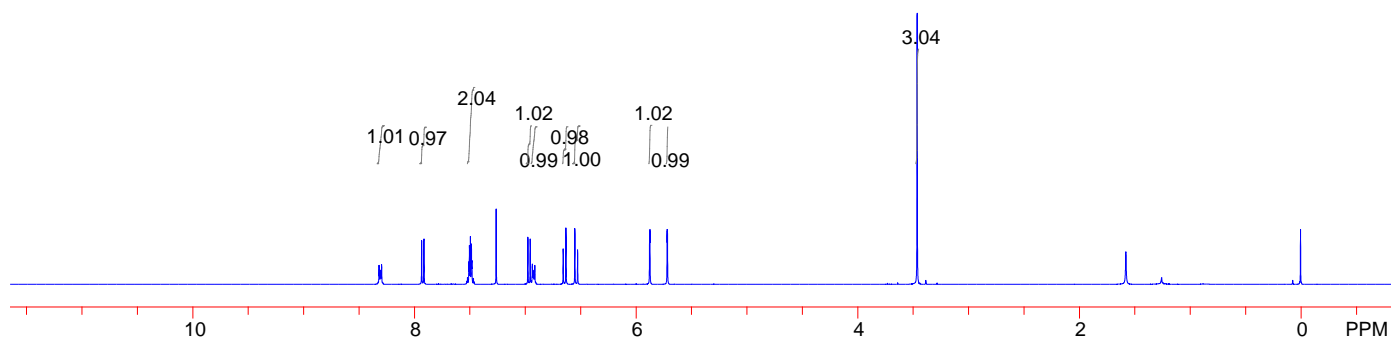

182.368  
169.685  
164.058  
151.779  
143.957  
143.928  
137.016  
134.344  
129.215  
129.013  
128.703  
127.352  
125.748  
124.701  
124.289  
123.155  
109.382  
102.607  
77.349  
77.031  
76.713  
51.390  
27.901

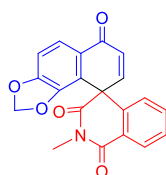

**3ra**

<sup>13</sup>C NMR (100 MHz, CDCl<sub>3</sub>)

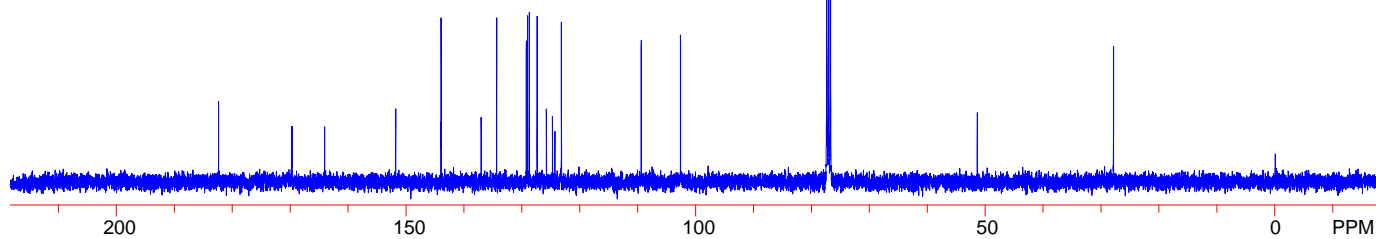

8.850  
8.429  
8.426  
8.418  
8.416  
8.414  
8.024  
8.017  
8.013  
8.008  
7.652  
7.646  
7.642  
7.640  
7.636  
7.547  
7.546  
7.544  
7.538  
7.535  
7.529  
7.527  
7.523  
7.517  
7.514  
7.265  
7.263  
6.985  
6.983  
6.981  
6.974  
6.970  
6.875  
6.858  
6.795  
6.778  
3.443

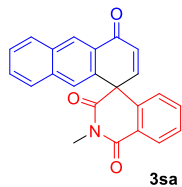

<sup>1</sup>H NMR (600 MHz, CDCl<sub>3</sub>)

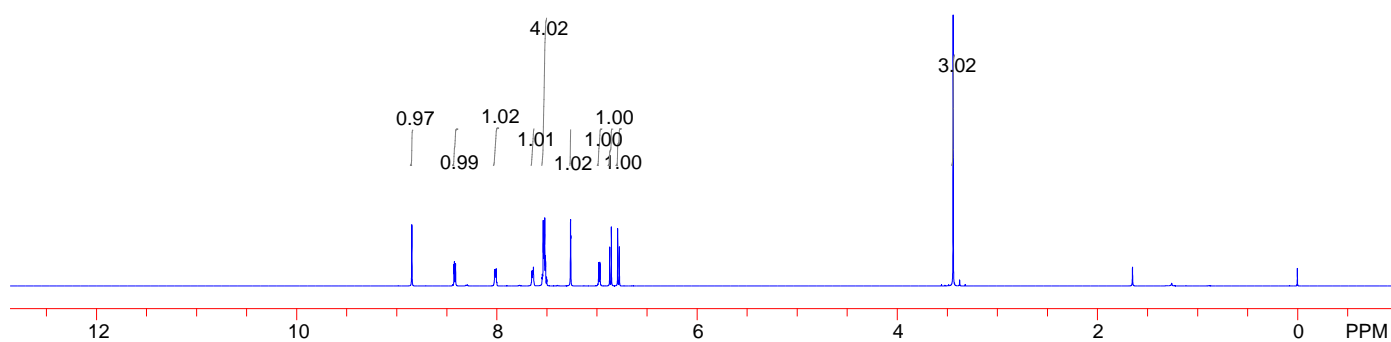

184.302  
170.258  
164.140  
139.815  
138.473  
135.068  
145.152  
134.754  
132.297  
130.321  
129.789  
129.388  
129.103  
128.994  
128.855  
128.542  
128.505  
127.725  
127.594  
127.426  
124.415  
77.273  
77.062  
76.850  
54.027  
28.083

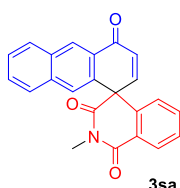

<sup>13</sup>C NMR (150 MHz, CDCl<sub>3</sub>)

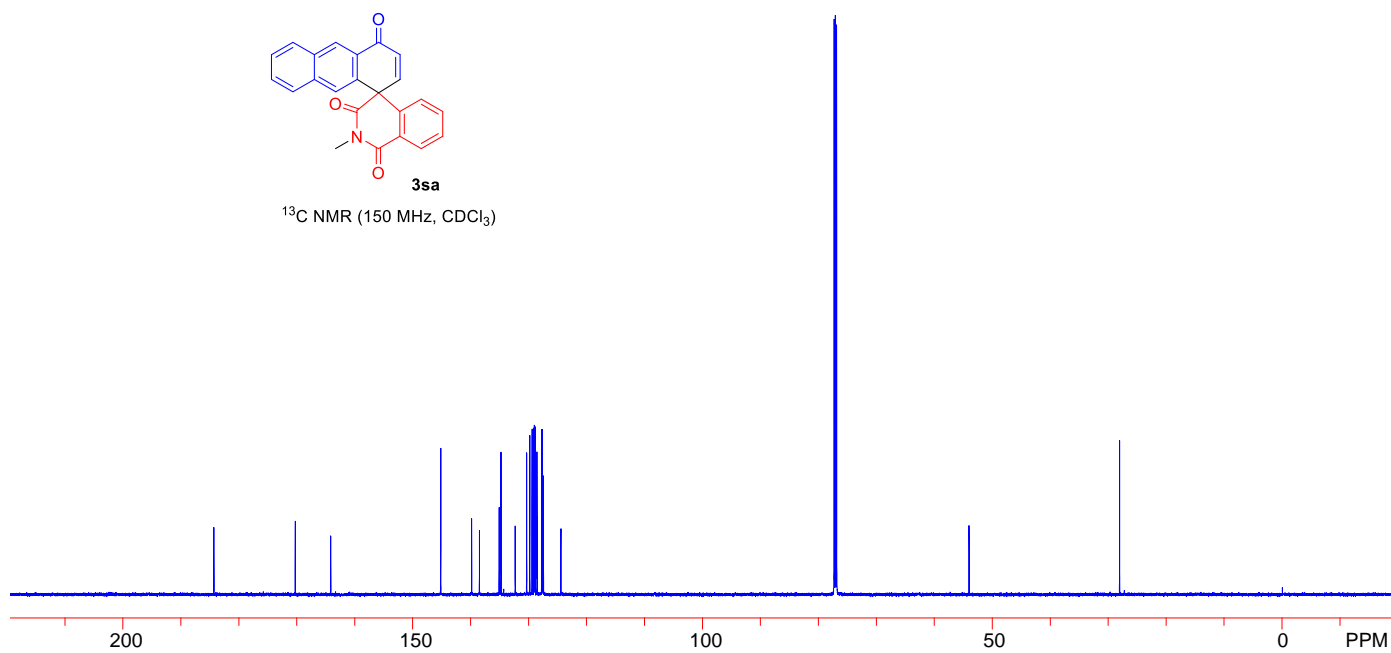

8.366  
8.352  
8.343  
7.637  
7.624  
7.544  
7.535  
7.531  
7.521  
7.266  
6.928  
6.920  
6.907  
6.845  
6.821  
6.650  
6.637  
6.625

3.437

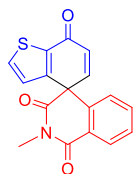

**3ta**

<sup>1</sup>H NMR (400 MHz, CDCl<sub>3</sub>)

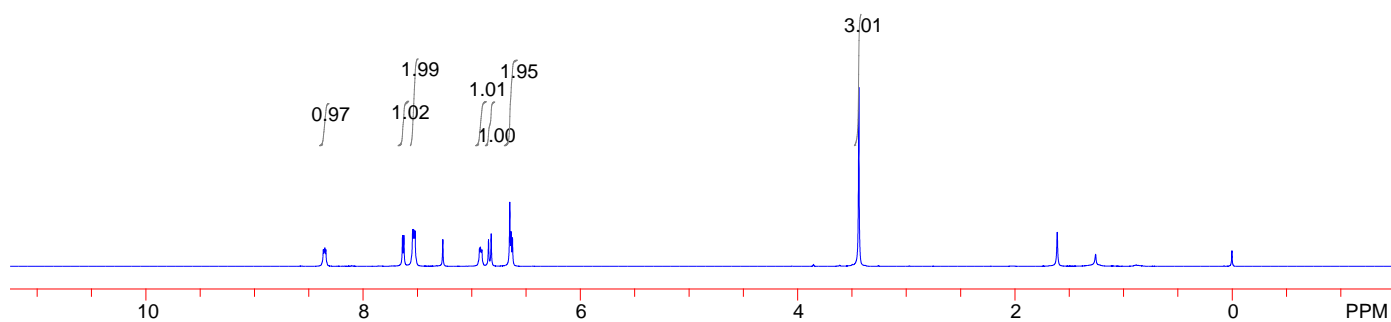

179.139  
168.551  
163.870  
148.471  
145.113  
137.457  
136.611  
134.719  
134.214  
129.800  
129.186  
127.287  
126.189  
124.232

77.356  
77.038  
76.720

54.395

28.125

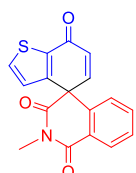

**3ta**

<sup>13</sup>C NMR (100 MHz, CDCl<sub>3</sub>)

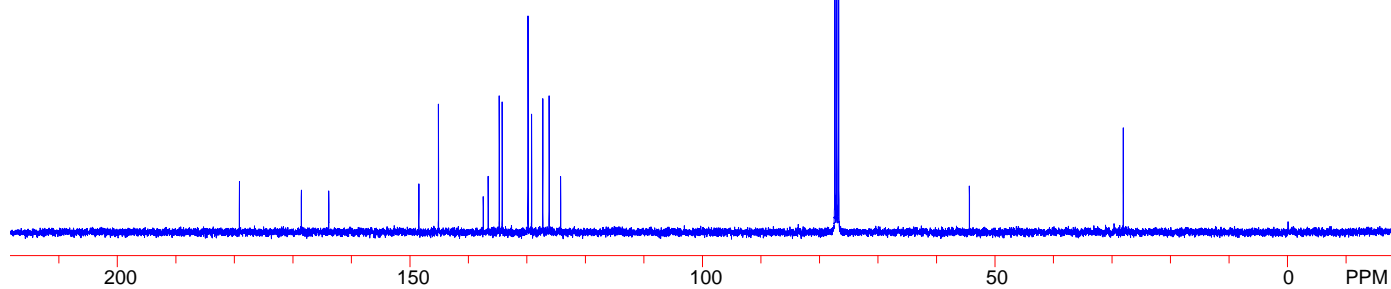

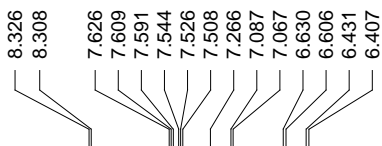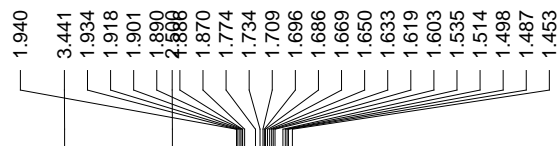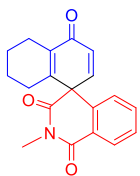

**3ua**

<sup>1</sup>H NMR (400 MHz, CDCl<sub>3</sub>)

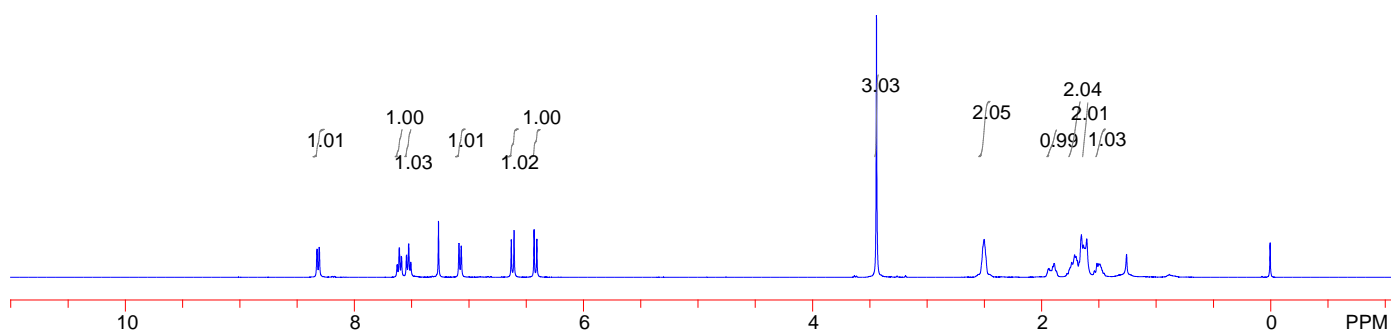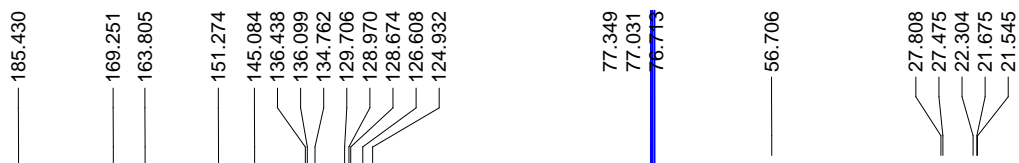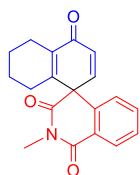

**3ua**

<sup>13</sup>C NMR (100 MHz, CDCl<sub>3</sub>)

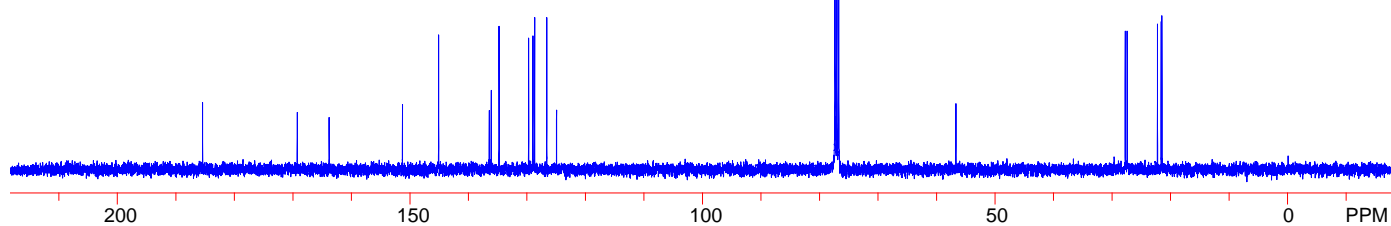



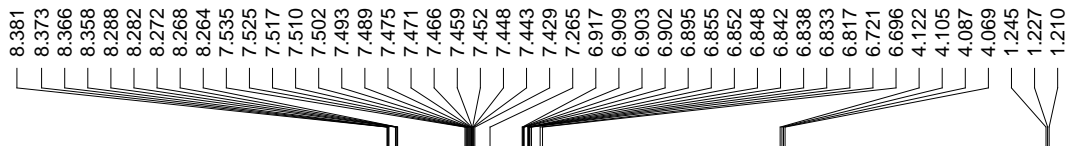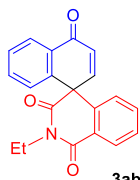

<sup>1</sup>H NMR (400 MHz, CDCl<sub>3</sub>)

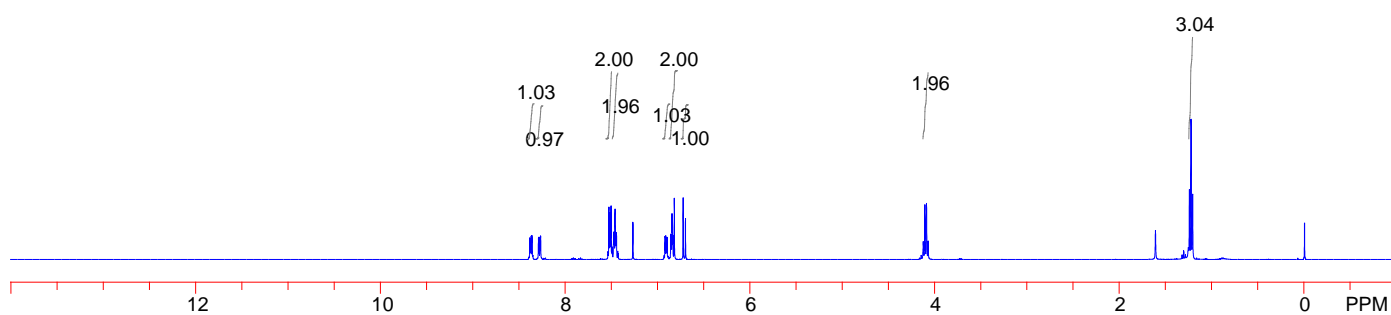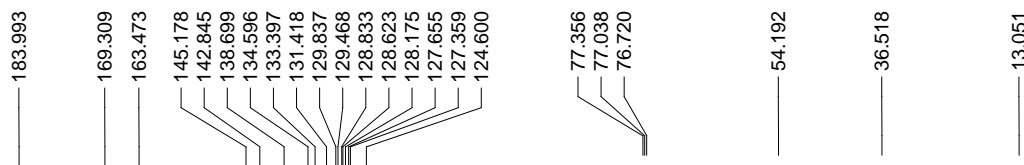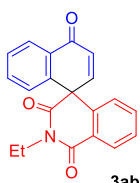

<sup>13</sup>C NMR (100 MHz, CDCl<sub>3</sub>)

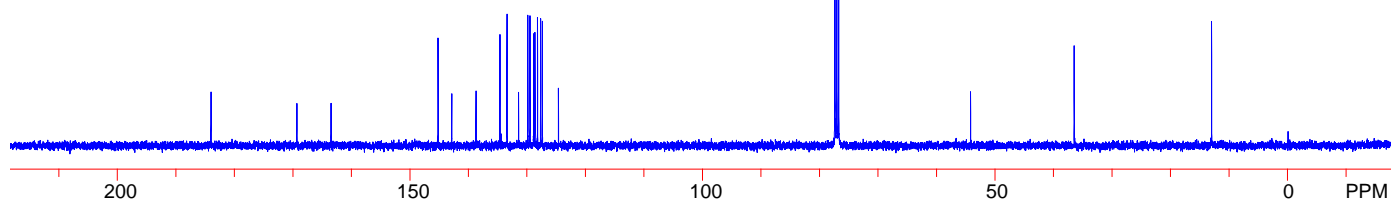

8.374  
8.369  
8.368  
8.364  
8.358  
8.281  
8.278  
8.270  
8.268  
8.266  
7.529  
7.522  
7.517  
7.512  
7.507  
7.483  
7.481  
7.471  
7.469  
7.459  
7.456  
7.446  
7.443  
7.434  
7.431  
7.266  
6.912  
6.907  
6.903  
6.902  
6.897  
6.897  
6.853  
6.852  
6.850  
6.841  
6.839  
6.831  
6.815  
6.710  
6.694  
4.014  
4.002  
3.989  
1.677  
1.674  
1.664  
1.659  
1.652  
1.646  
1.639  
1.634  
1.624  
1.622  
1.617  
1.612  
0.942  
0.930  
0.918

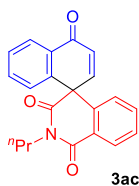

**3ac**

<sup>1</sup>H NMR (600 MHz, CDCl<sub>3</sub>)

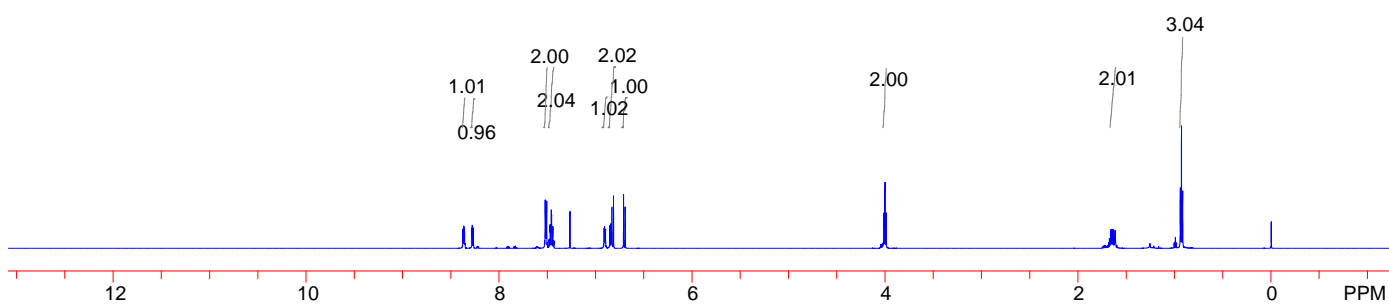

183.996  
169.544  
163.696  
145.233  
142.899  
138.714  
134.594  
133.369  
131.451  
129.796  
129.504  
128.841  
128.622  
128.177  
127.710  
127.331  
124.582  
77.266  
77.054  
76.843  
54.267  
42.790  
21.163  
11.341

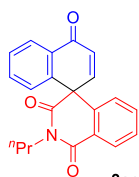

**3ac**

<sup>13</sup>C NMR (150 MHz, CDCl<sub>3</sub>)

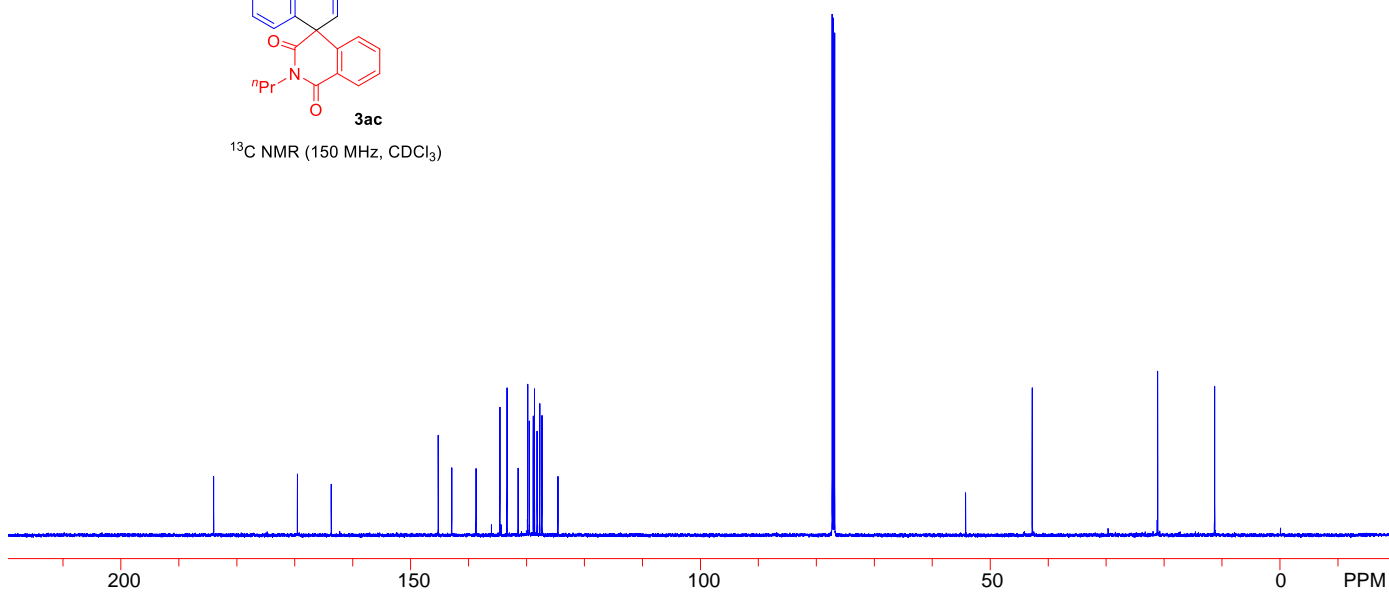

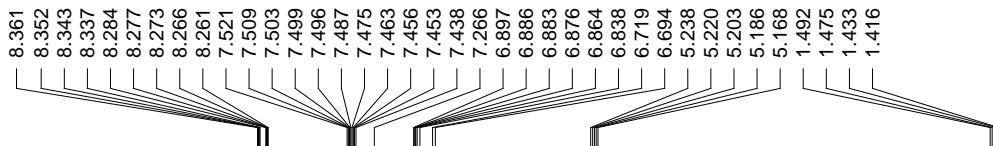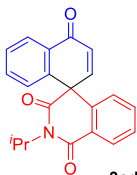

**3ad**

<sup>1</sup>H NMR (400 MHz, CDCl<sub>3</sub>)

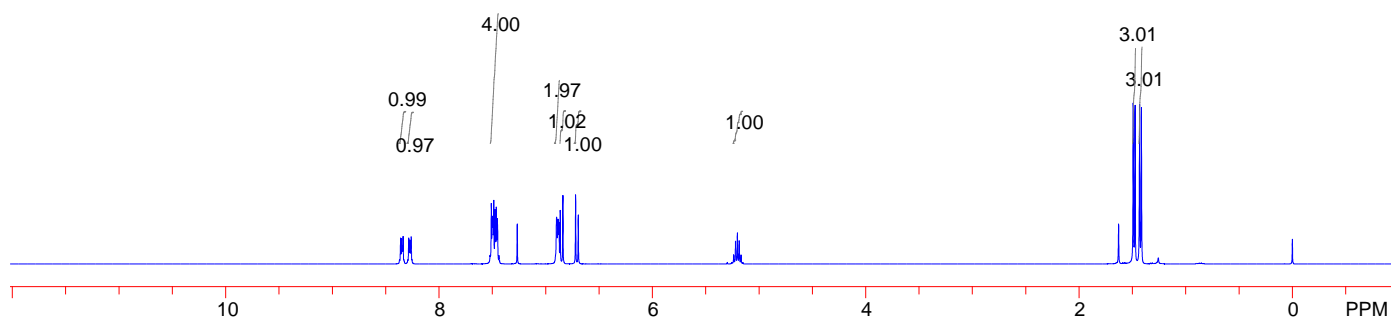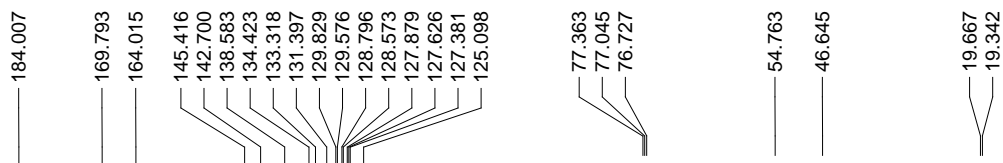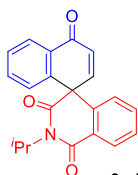

**3ad**

<sup>13</sup>C NMR (100 MHz, CDCl<sub>3</sub>)

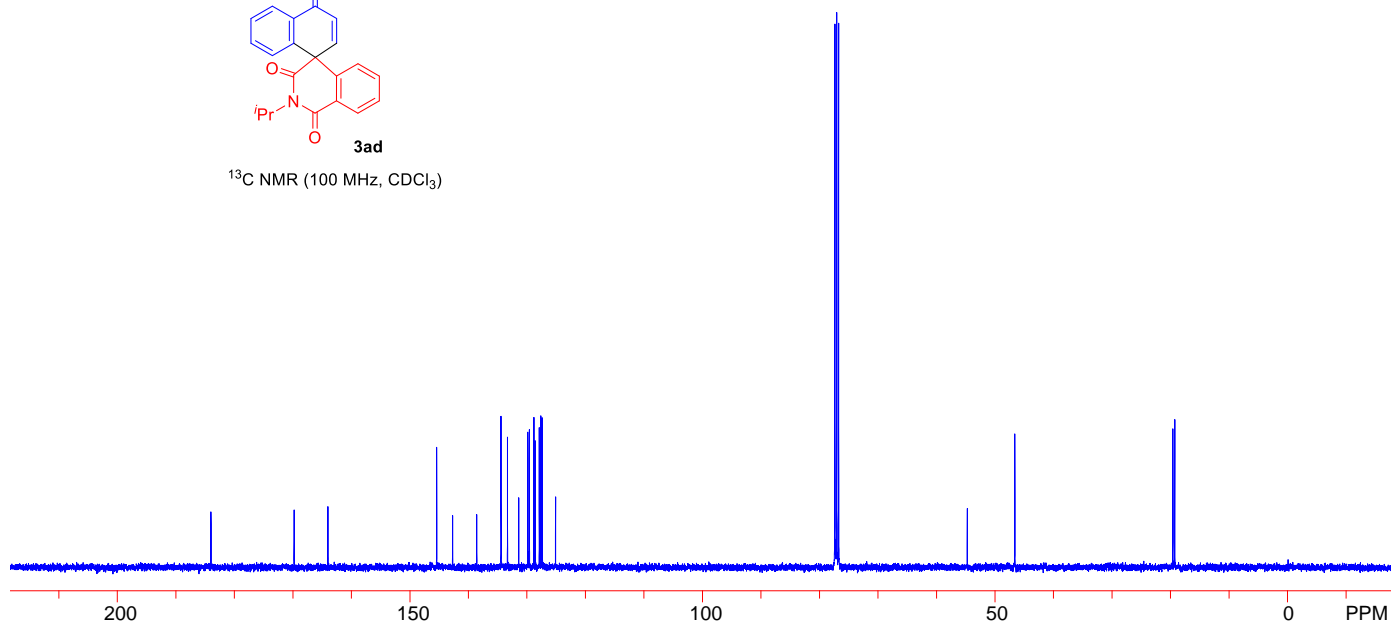

8.372  
8.365  
8.359  
8.348  
8.271  
8.269  
8.251  
7.523  
7.511  
7.505  
7.501  
7.494  
7.489  
7.476  
7.466  
7.447  
7.429  
7.398  
7.367  
7.348  
7.345  
7.294  
7.287  
7.273  
7.258  
7.254  
7.238  
7.223  
7.219  
6.918  
6.909  
6.898  
6.891  
6.886  
6.811  
6.786  
6.767  
6.747  
6.701  
6.676  
5.271  
5.236  
5.189  
5.155

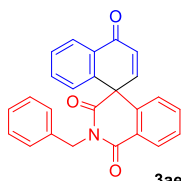

<sup>1</sup>H NMR (400 MHz, CDCl<sub>3</sub>)

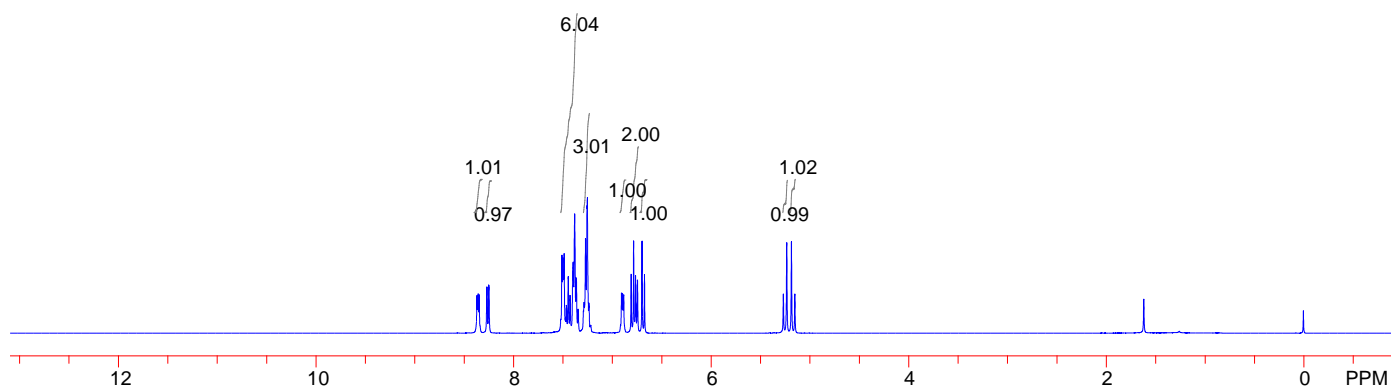

183.913  
169.663  
163.625  
144.997  
142.642  
138.670  
136.496  
134.748  
133.340  
131.361  
129.902  
129.634  
129.042  
128.883  
128.659  
128.558  
128.190  
127.829  
127.771  
127.352  
124.506  
77.370  
77.060  
76.742  
54.322  
44.405

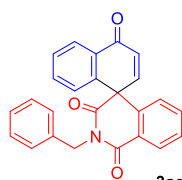

<sup>13</sup>C NMR (100 MHz, CDCl<sub>3</sub>)

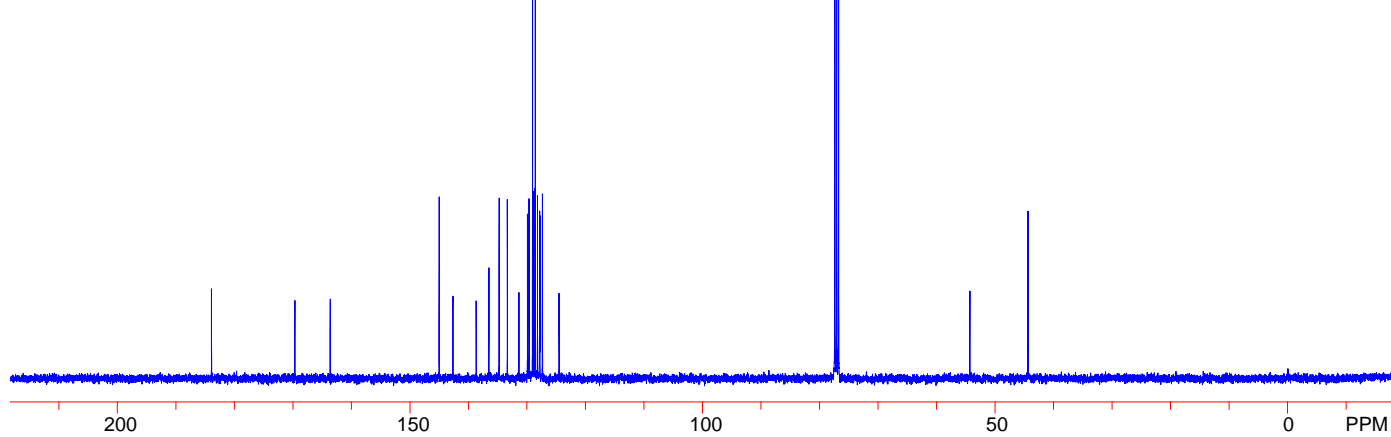

8.373  
8.365  
8.358  
8.354  
8.350  
8.341  
8.332  
8.273  
8.270  
8.253  
8.250  
7.515  
7.504  
7.495  
7.491  
7.488  
7.481  
7.469  
7.466  
7.449  
7.447  
7.430  
7.428  
7.386  
7.382  
7.366  
7.344  
7.261  
6.907  
6.896  
6.888  
6.884  
6.880  
6.874  
6.865  
6.813  
6.806  
6.801  
6.796  
6.789  
6.784  
6.771  
6.751  
6.750  
6.732  
6.731  
6.698  
6.673  
6.673  
5.211  
5.177  
5.121  
5.088  
3.763

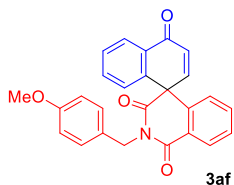

<sup>1</sup>H NMR (400 MHz, CDCl<sub>3</sub>)

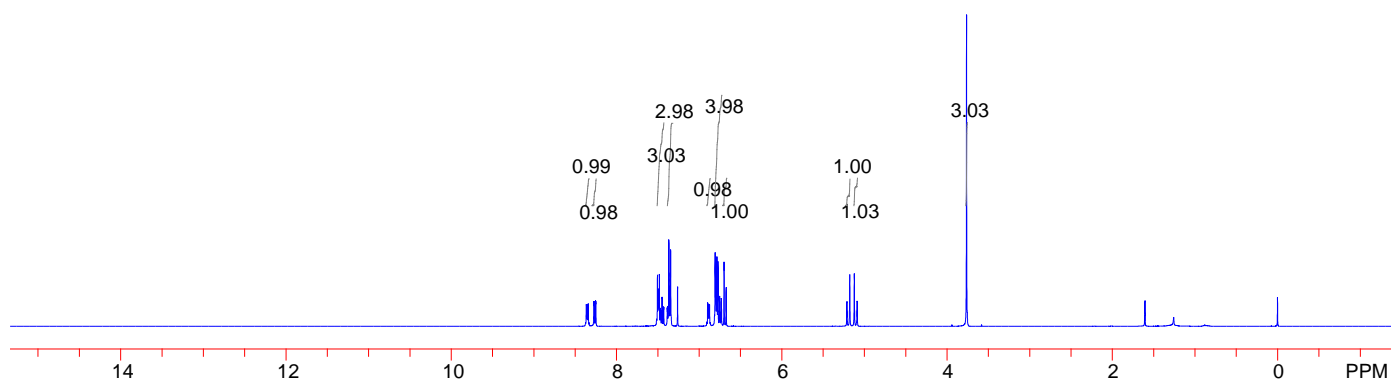

183.935  
169.670  
163.617  
159.190  
145.055  
142.679  
138.641  
134.676  
133.340  
131.353  
130.682  
129.858  
129.598  
128.840  
128.768  
128.623  
128.154  
127.756  
127.330  
124.557  
113.845  
77.363  
77.045  
76.727  
55.247  
54.308  
43.857

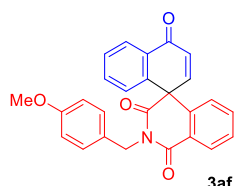

<sup>13</sup>C NMR (100 MHz, CDCl<sub>3</sub>)

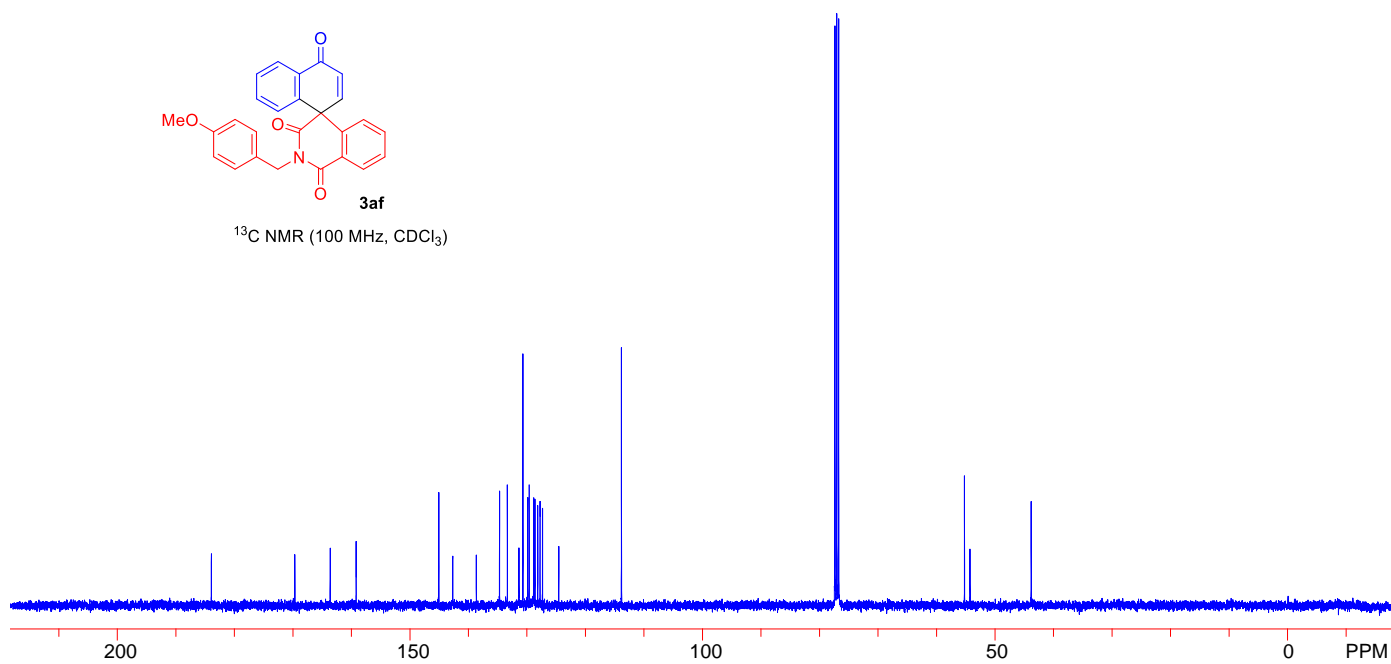

8.361  
8.353  
8.347  
8.341  
8.338  
8.330  
8.321  
8.265  
8.261  
8.246  
8.243  
7.511  
7.507  
7.499  
7.493  
7.489  
7.487  
7.481  
7.476  
7.471  
7.468  
7.463  
7.452  
7.449  
7.434  
7.430  
7.421  
7.417  
7.402  
7.398  
7.383  
7.379  
7.263  
7.149  
7.133  
7.127  
6.902  
6.892  
6.886  
6.882  
6.875  
6.870  
6.861  
6.854  
6.852  
6.841  
6.836  
6.833  
6.816  
6.686  
6.661  
6.406  
6.400  
6.390  
6.384  
5.178  
3.762  
3.651

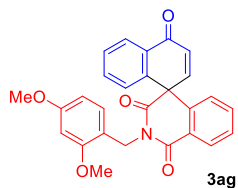

<sup>1</sup>H NMR (400 MHz, CDCl<sub>3</sub>)

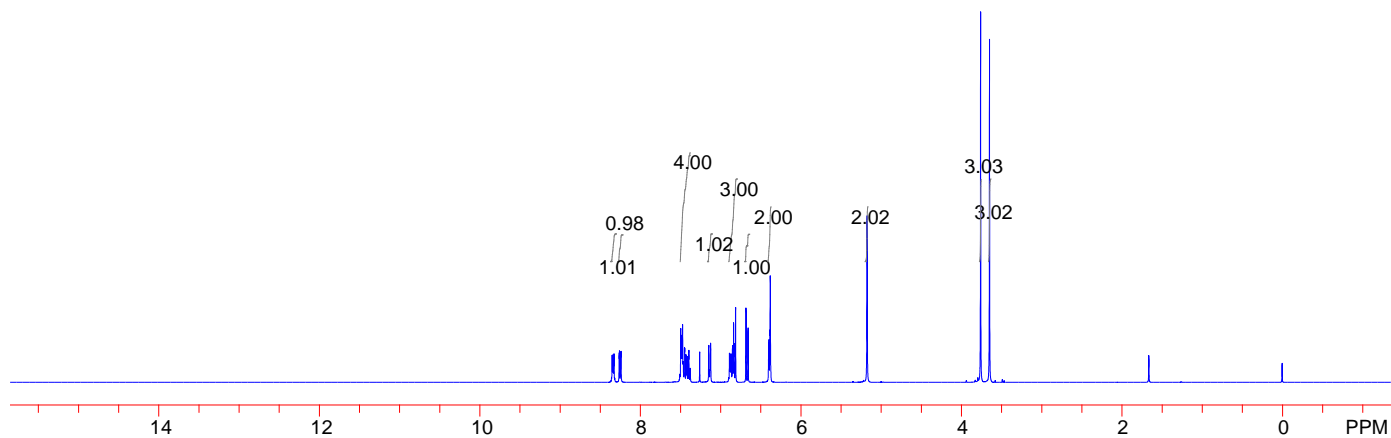

184.065  
163.654  
169.237  
160.411  
158.388  
145.481  
142.809  
138.764  
134.517  
133.173  
131.491  
130.378  
129.562  
129.548  
128.782  
128.529  
128.146  
128.125  
127.200  
124.766  
116.778  
103.993  
98.425  
77.392  
77.074  
76.756  
55.355  
55.326  
54.582  
40.057

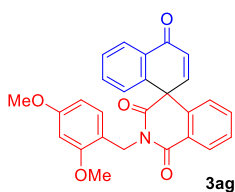

<sup>13</sup>C NMR (100 MHz, CDCl<sub>3</sub>)

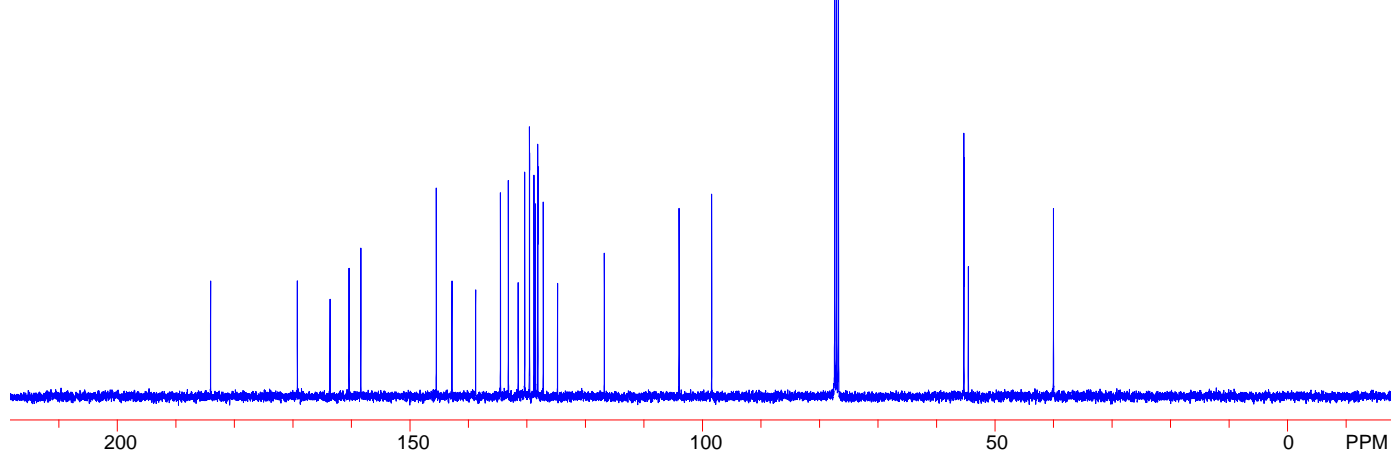

8.367  
8.359  
8.352  
8.344  
8.292  
8.288  
8.272  
8.269  
7.540  
7.530  
7.522  
7.515  
7.507  
7.498  
7.483  
7.480  
7.465  
7.460  
7.454  
7.439  
7.435  
7.420  
7.417  
7.265  
6.962  
6.943  
6.941  
6.906  
6.898  
6.887  
6.862  
6.711  
6.686  
4.285  
4.267  
4.251  
4.235  
4.219  
4.205  
4.190  
4.171  
3.581  
2.645  
2.630  
2.615  
2.540  
2.479

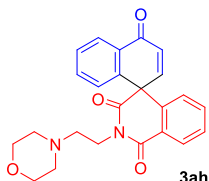

<sup>1</sup>H NMR (400 MHz, CDCl<sub>3</sub>)

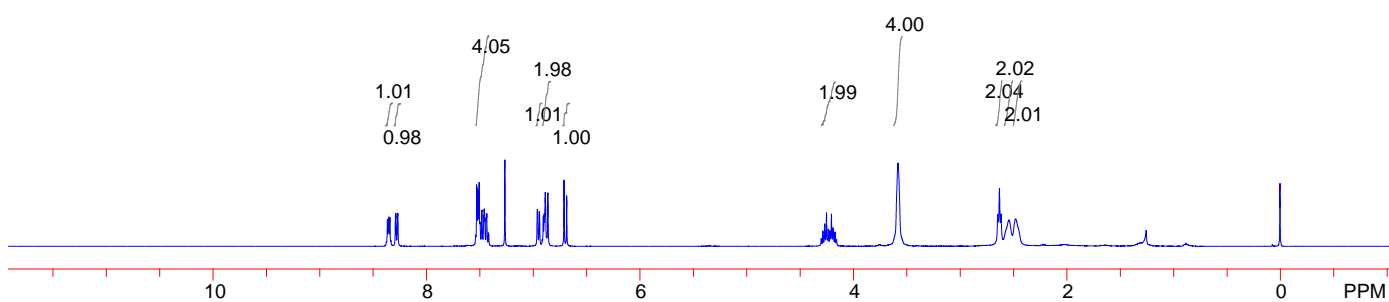

183.971  
169.815  
163.704  
145.438  
142.903  
138.742  
134.661  
133.289  
131.469  
129.548  
129.504  
128.847  
128.659  
128.190  
128.089  
127.280  
124.419  
77.356  
77.038  
76.720  
66.904  
55.817  
54.344  
53.773  
37.551

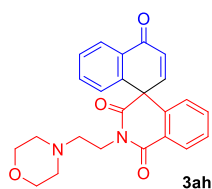

<sup>13</sup>C NMR (100 MHz, CDCl<sub>3</sub>)

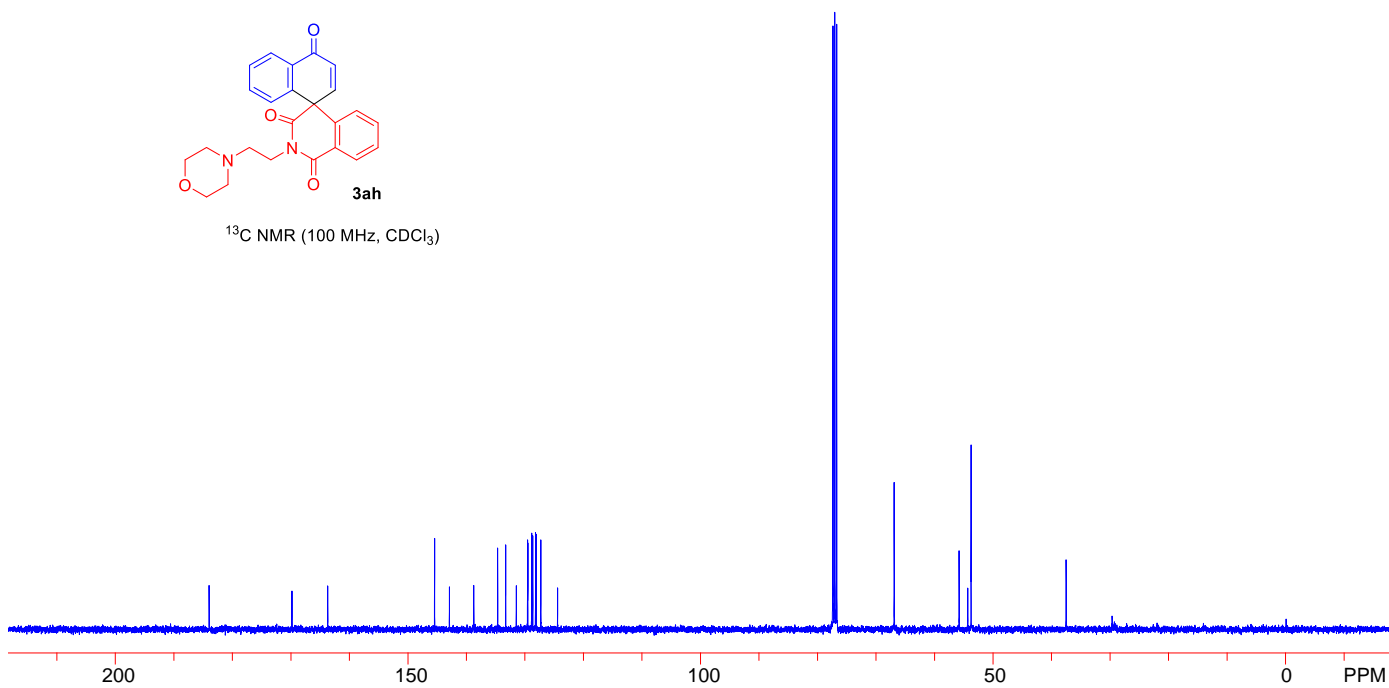

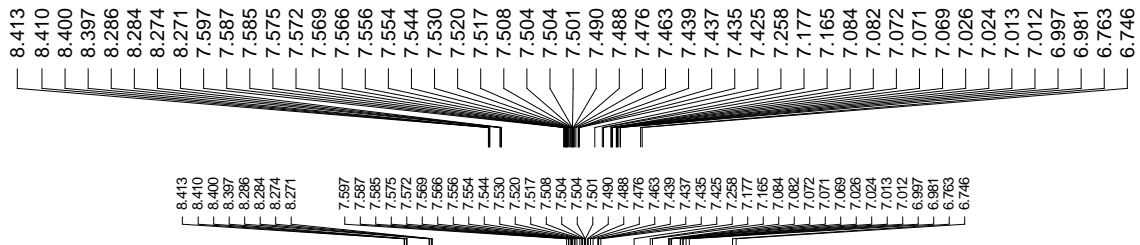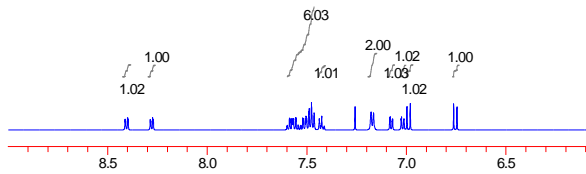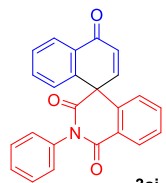

<sup>1</sup>H NMR (600 MHz, CDCl<sub>3</sub>)

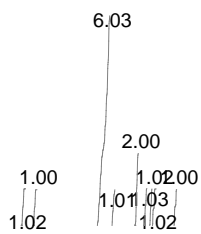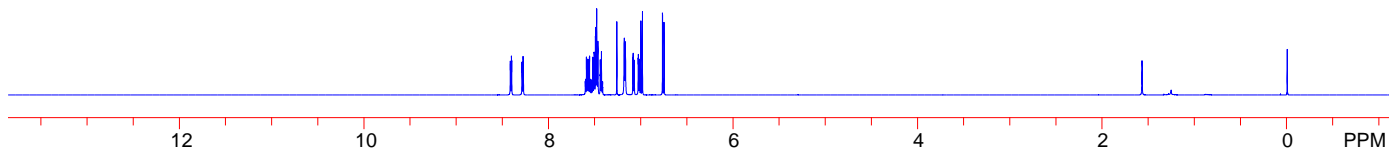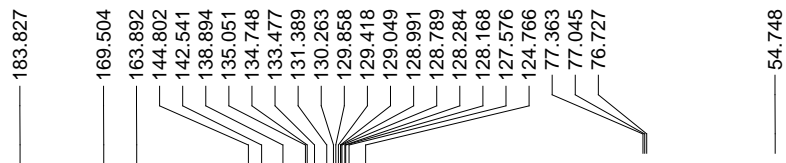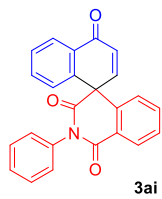

<sup>13</sup>C NMR (100 MHz, CDCl<sub>3</sub>)

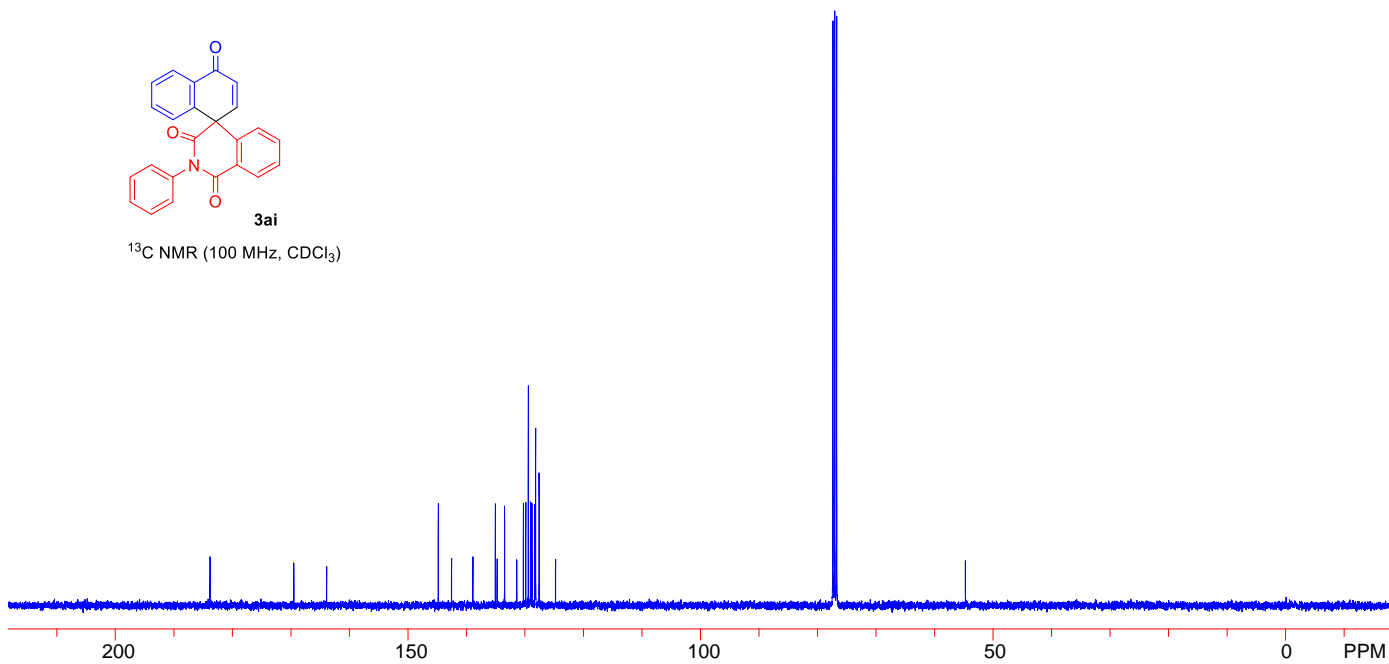



8.413  
8.409  
8.407  
8.395  
8.390  
8.287  
8.283  
8.280  
8.269  
8.264  
7.582  
7.577  
7.565  
7.562  
7.559  
7.549  
7.545  
7.530  
7.519  
7.514  
7.505  
7.501  
7.495  
7.487  
7.483  
7.283  
7.260  
7.080  
7.076  
7.058  
7.038  
7.021  
7.017  
7.004  
6.998  
6.973  
6.764  
6.739  
2.388

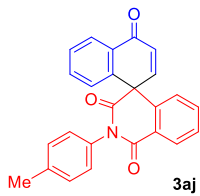

**3aj**  
<sup>1</sup>H NMR (400 MHz, CDCl<sub>3</sub>)

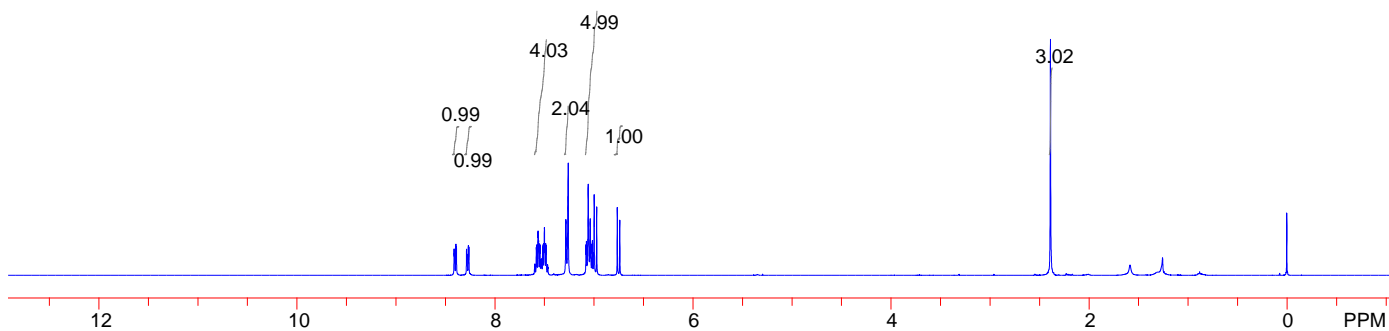

183.899  
169.540  
164.000  
144.903  
142.599  
139.002  
138.858  
134.994  
133.470  
132.018  
131.361  
130.212  
130.125  
129.873  
129.006  
128.753  
128.247  
127.800  
127.583  
127.540  
124.802  
77.370  
77.052  
76.735  
54.727  
21.271

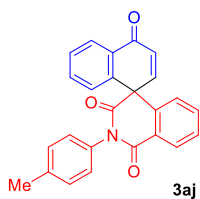

**3aj**  
<sup>13</sup>C NMR (100 MHz, CDCl<sub>3</sub>)

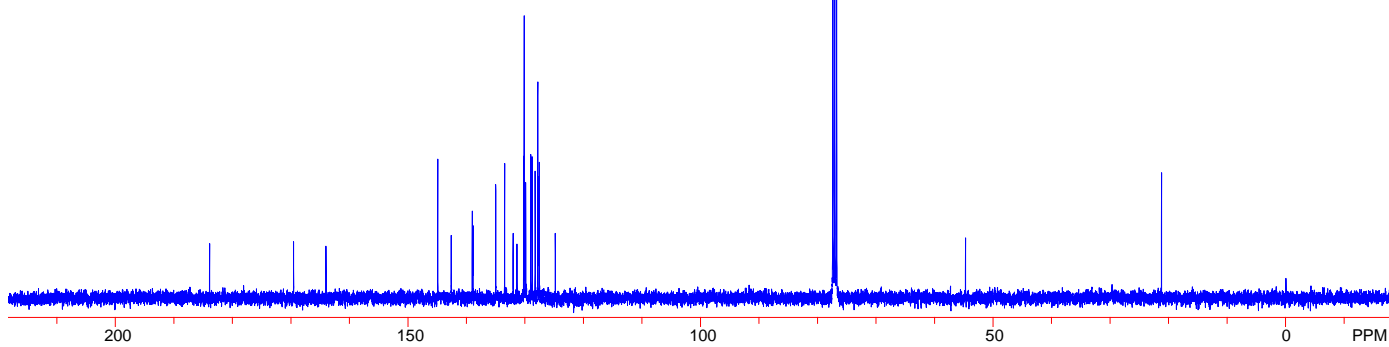

8.410  
8.407  
8.404  
8.392  
8.387  
8.286  
8.282  
8.278  
8.268  
8.262  
7.598  
7.593  
7.579  
7.574  
7.564  
7.562  
7.560  
7.556  
7.546  
7.542  
7.527  
7.513  
7.508  
7.502  
7.496  
7.489  
7.483  
7.479  
7.465  
7.258  
7.091  
7.070  
7.055  
7.052  
7.049  
7.019  
7.014  
7.002  
6.997  
6.990  
6.985  
6.965  
6.759  
6.734  
3.818

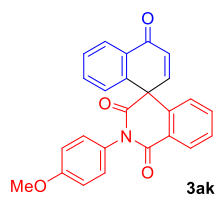

<sup>1</sup>H NMR (400 MHz, CDCl<sub>3</sub>)

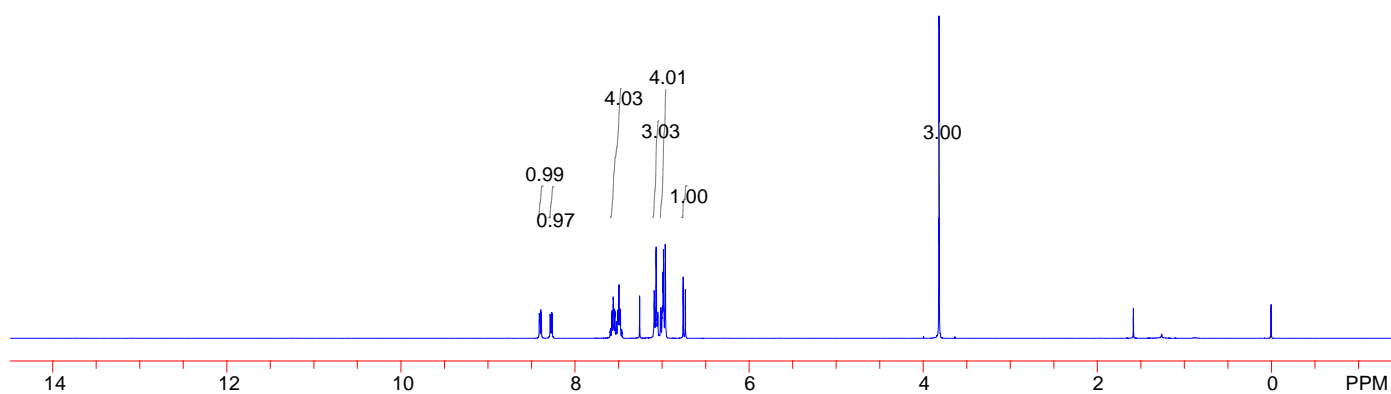

183.856  
169.685  
164.094  
159.746  
144.889  
142.606  
138.843  
134.979  
133.448  
131.375  
130.205  
129.873  
129.136  
129.006  
128.746  
128.240  
127.569  
127.540  
127.164  
124.831  
114.719  
77.363  
77.045  
76.727  
55.500  
54.756

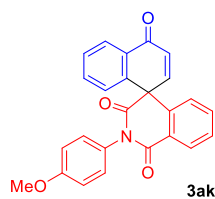

<sup>13</sup>C NMR (100 MHz, CDCl<sub>3</sub>)

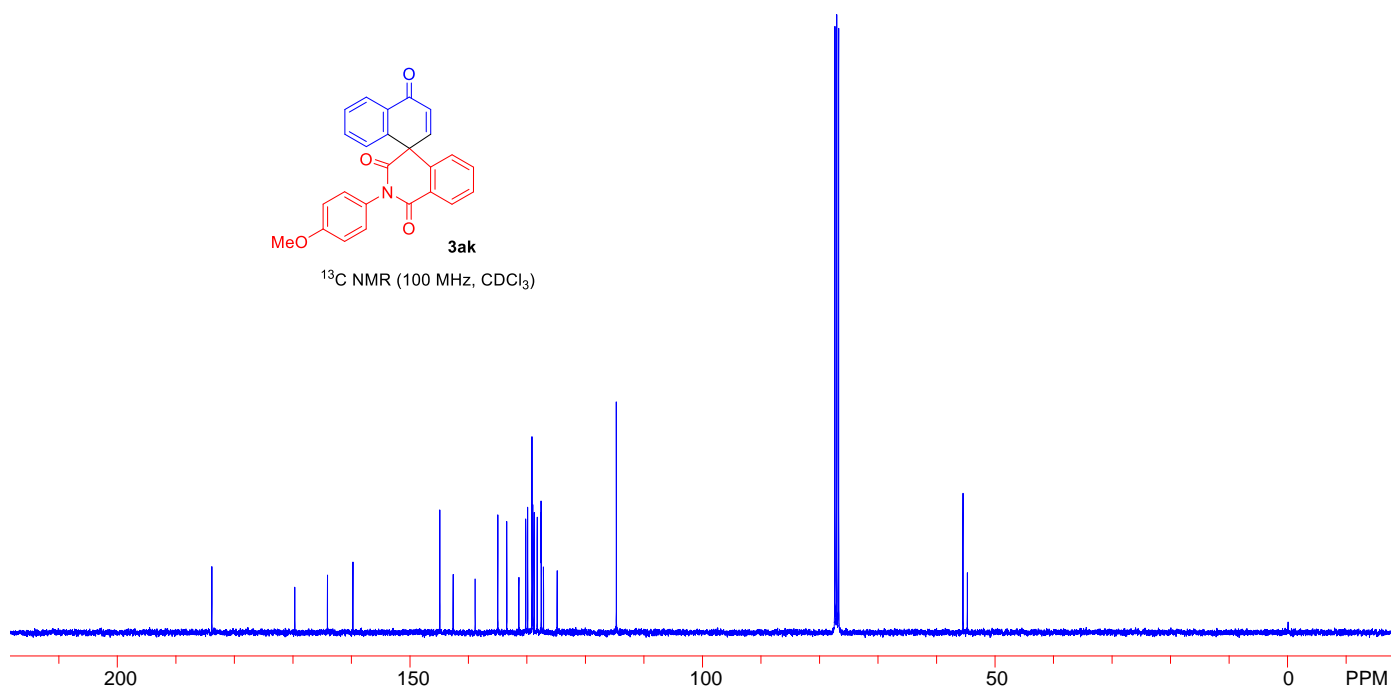

8.408  
8.405  
8.390  
8.385  
8.291  
8.287  
8.284  
8.274  
8.268  
7.615  
7.612  
7.597  
7.593  
7.579  
7.575  
7.560  
7.557  
7.541  
7.522  
7.517  
7.513  
7.506  
7.498  
7.494  
7.491  
7.476  
7.259  
7.159  
7.142  
7.059  
7.054  
7.037  
7.031  
7.027  
7.009  
6.986  
6.961  
6.766  
6.741

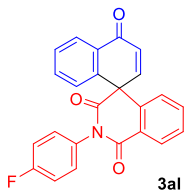

<sup>1</sup>H NMR (400 MHz, CDCl<sub>3</sub>)

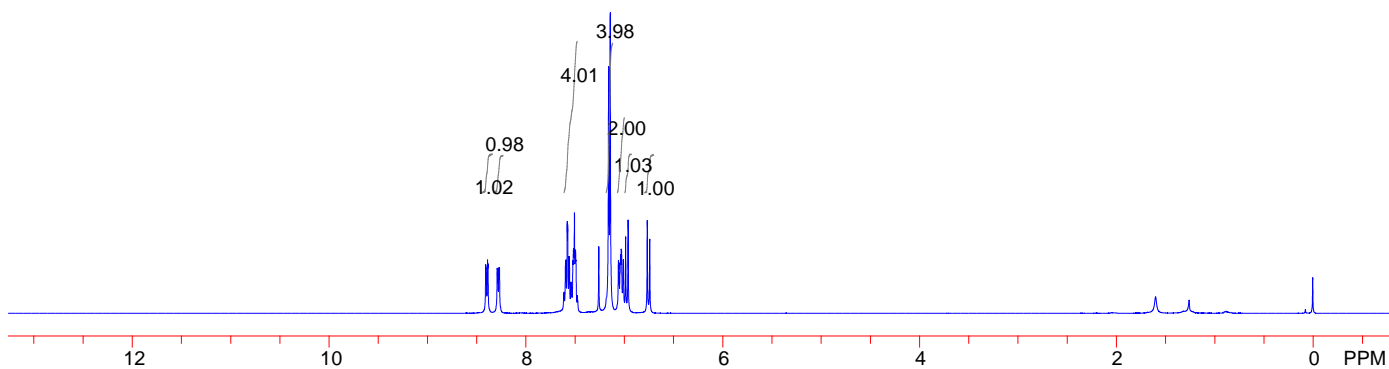

183.740  
163.892  
163.805  
161.328  
160.576  
144.629  
142.419  
138.858  
135.189  
133.506  
131.382  
130.487  
130.450  
130.320  
130.075  
129.988  
129.873  
129.114  
128.861  
128.320  
127.619  
127.511  
124.607  
116.575  
116.344  
77.370  
77.052  
76.735  
54.734

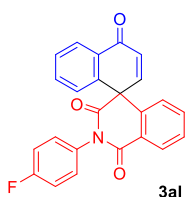

<sup>13</sup>C NMR (100 MHz, CDCl<sub>3</sub>)

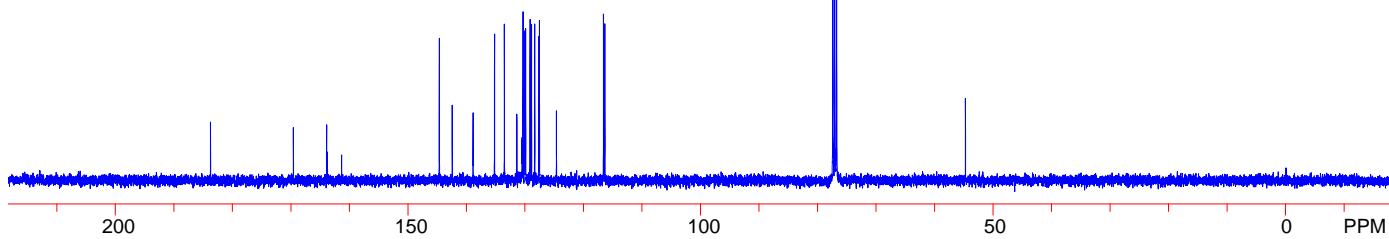

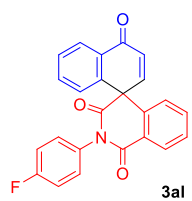

<sup>19</sup>F NMR (376 MHz, CDCl<sub>3</sub>)

-112.186  
-112.205  
-112.219  
-112.238  
-112.256

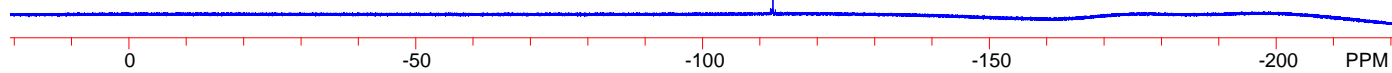

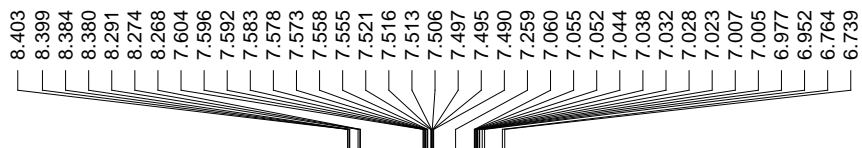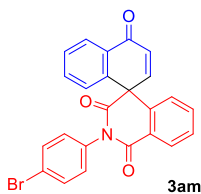

<sup>1</sup>H NMR (400 MHz, CDCl<sub>3</sub>)

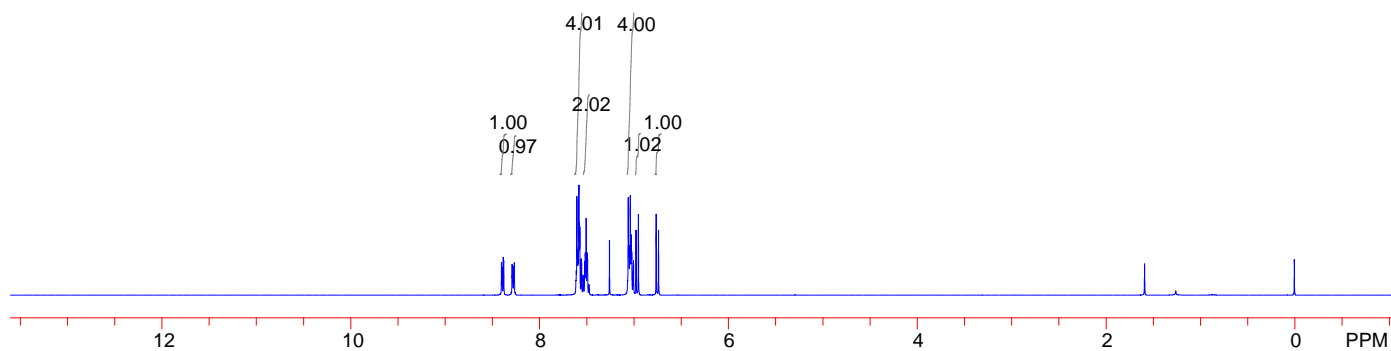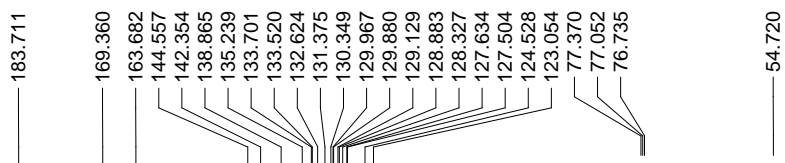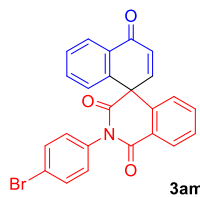

<sup>13</sup>C NMR (100 MHz, CDCl<sub>3</sub>)

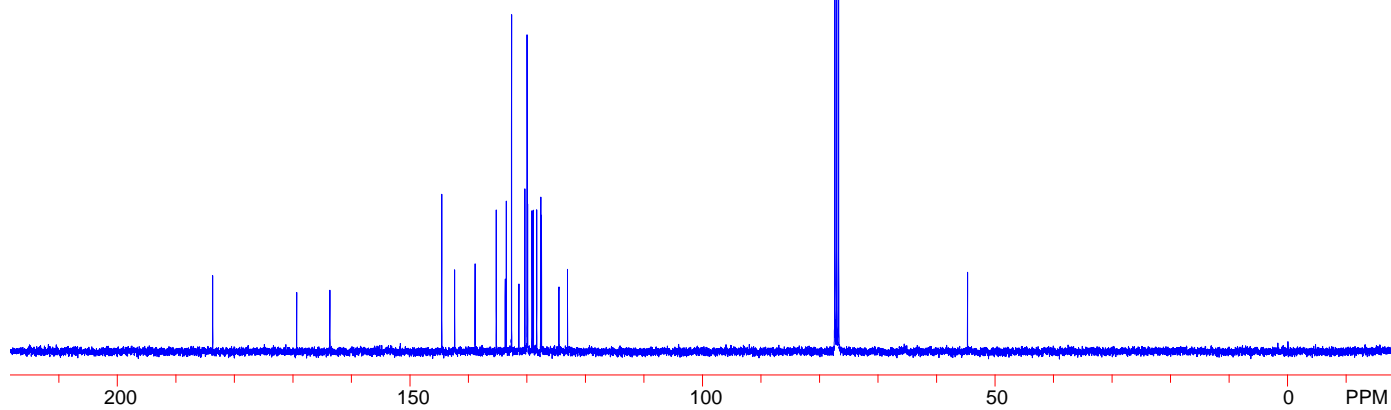

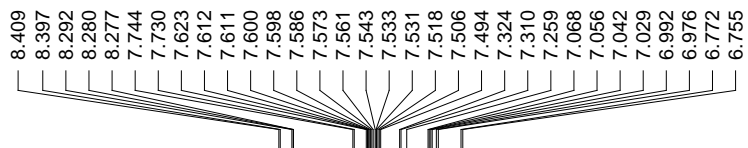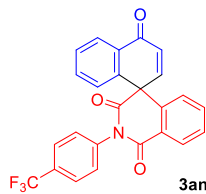

<sup>1</sup>H NMR (600 MHz, CDCl<sub>3</sub>)

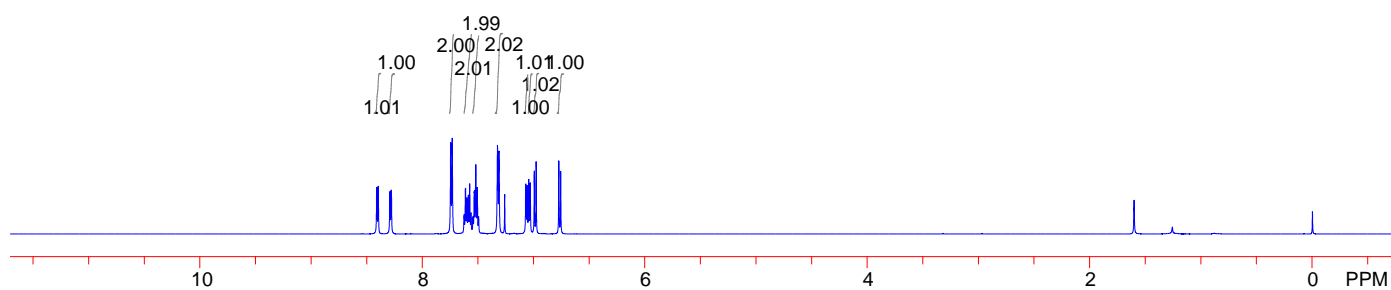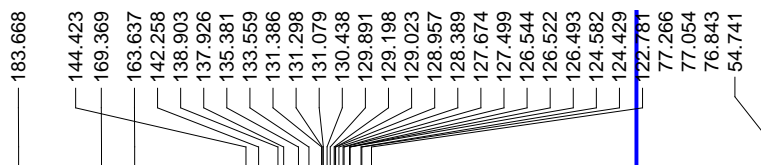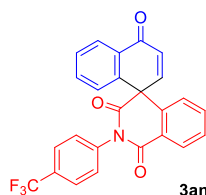

<sup>13</sup>C NMR (150 MHz, CDCl<sub>3</sub>)

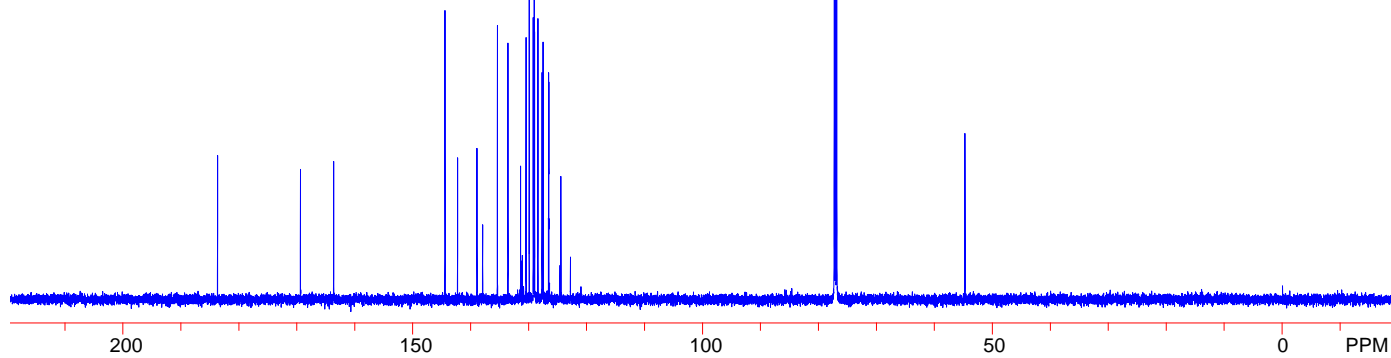

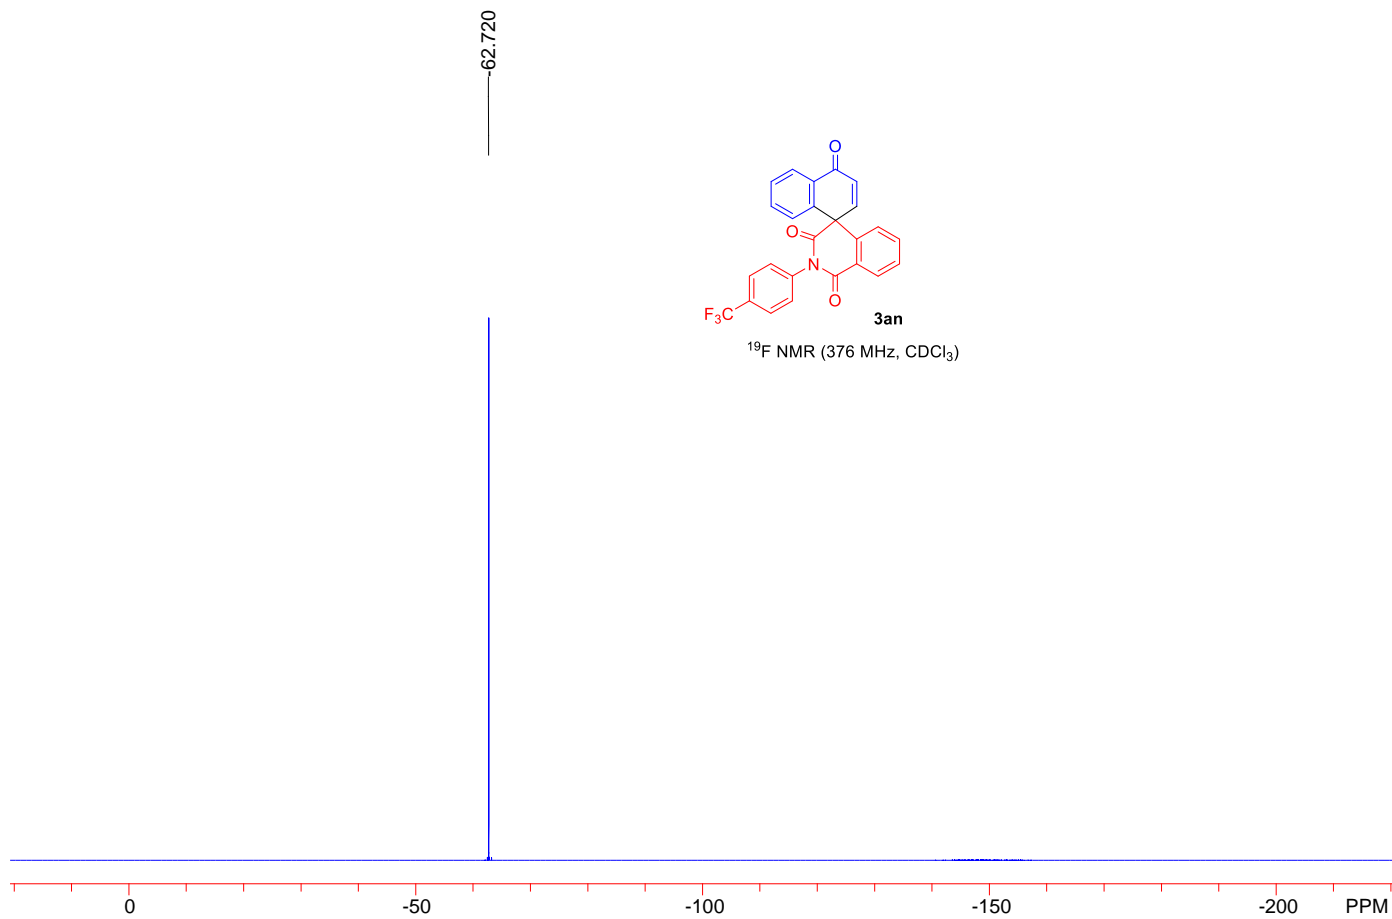

8.430  
8.412  
8.297  
8.278  
7.938  
7.916  
7.881  
7.861  
7.825  
7.807  
7.692  
7.603  
7.589  
7.585  
7.571  
7.552  
7.533  
7.526  
7.520  
7.516  
7.508  
7.502  
7.482  
7.250  
7.244  
7.222  
7.146  
7.127  
7.038  
7.013  
6.773  
6.748

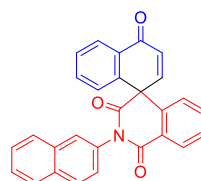

<sup>1</sup>H NMR (400 MHz, CDCl<sub>3</sub>)

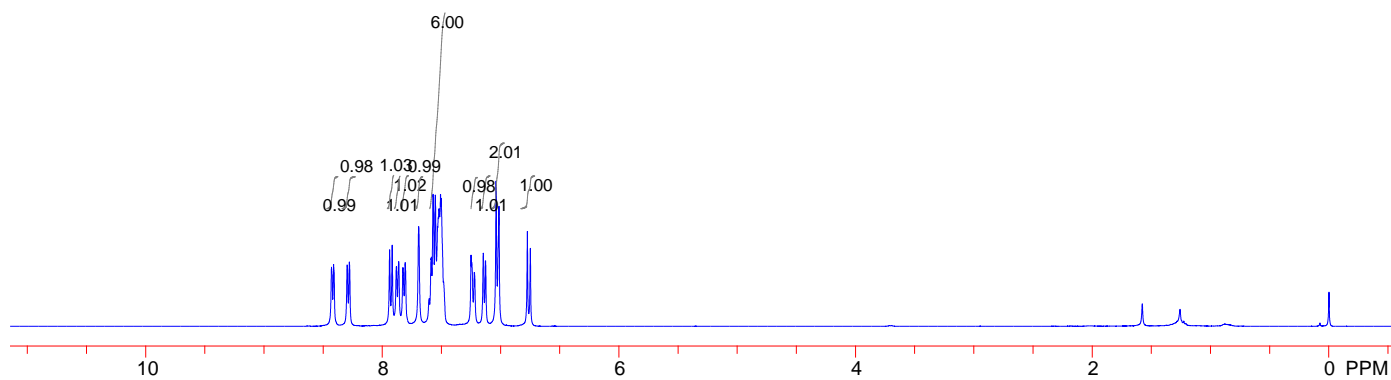

183.841  
144.845  
169.670  
164.080  
142.577  
138.952  
135.095  
133.542  
133.448  
133.159  
132.104  
131.426  
130.270  
129.880  
129.403  
129.071  
128.825  
128.320  
128.161  
127.872  
127.662  
127.590  
127.410  
126.984  
126.622  
125.481  
124.809  
77.377  
77.060  
76.742  
54.842

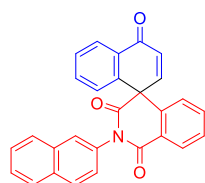

<sup>13</sup>C NMR (100 MHz, CDCl<sub>3</sub>)

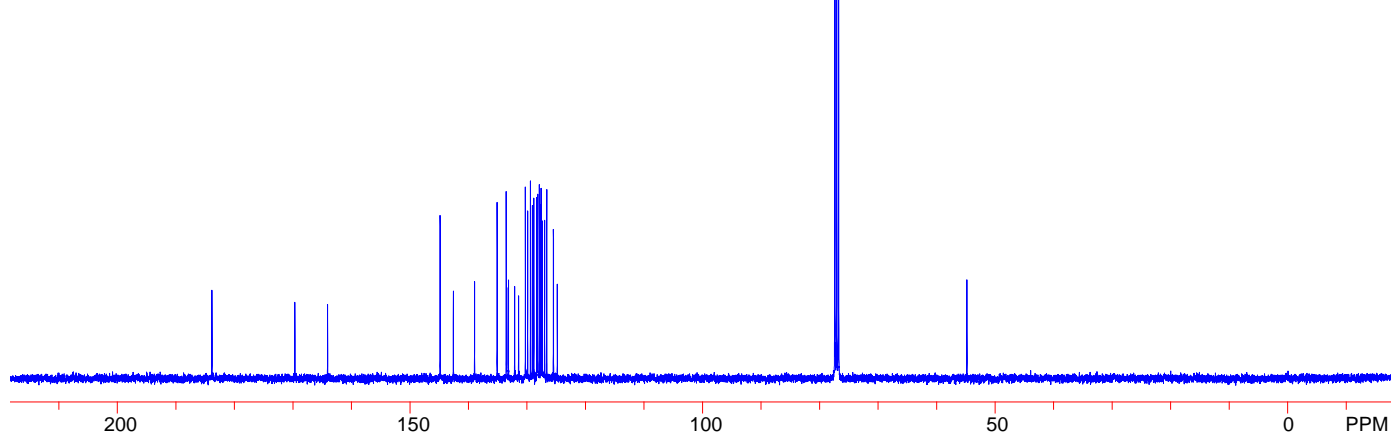



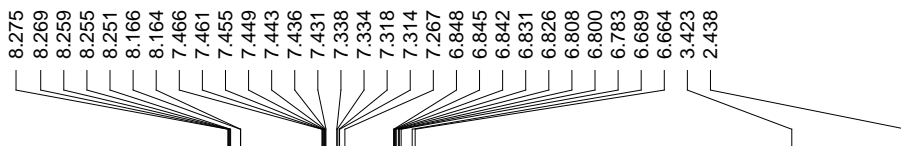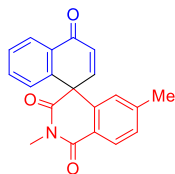

<sup>1</sup>H NMR (400 MHz, CDCl<sub>3</sub>)

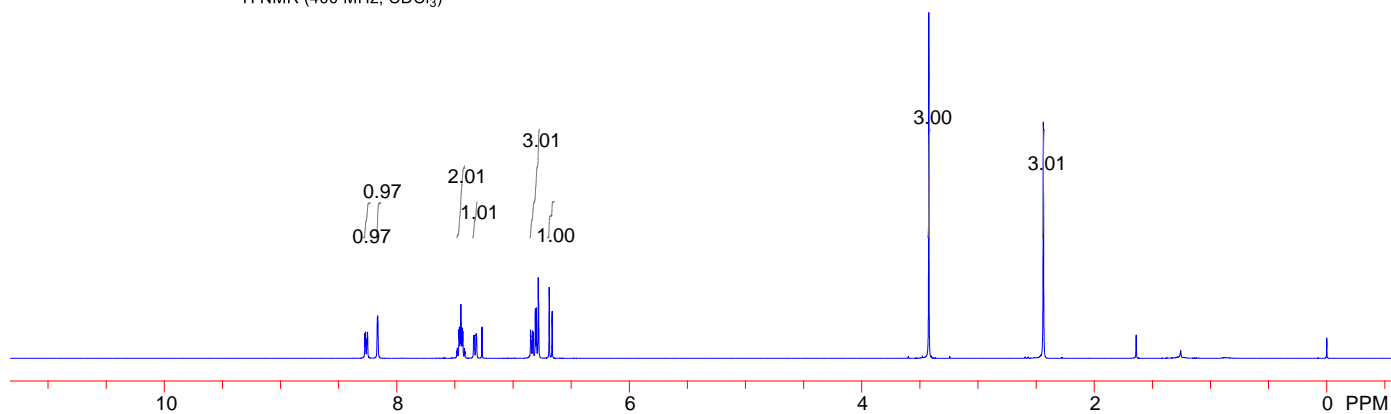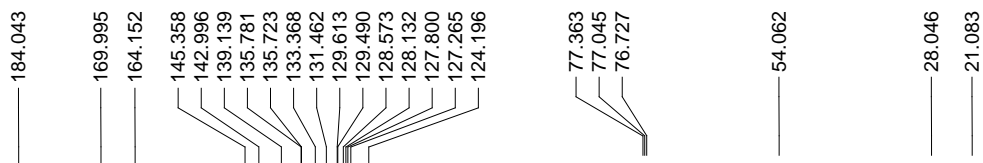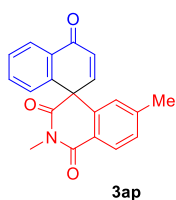

<sup>13</sup>C NMR (100 MHz, CDCl<sub>3</sub>)

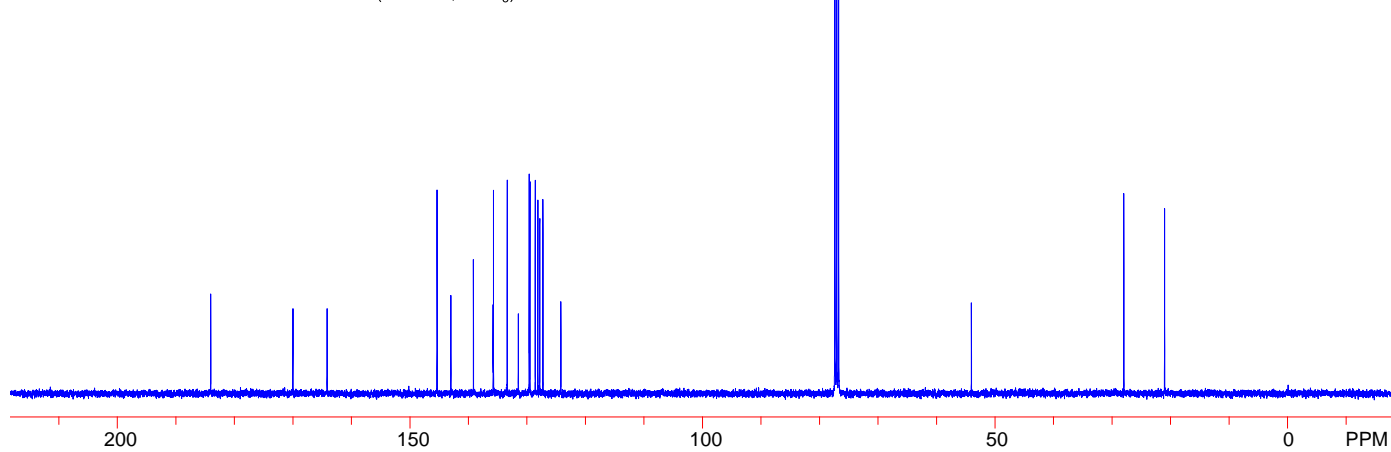

## VII. Copies of NMR spectra of 4-7

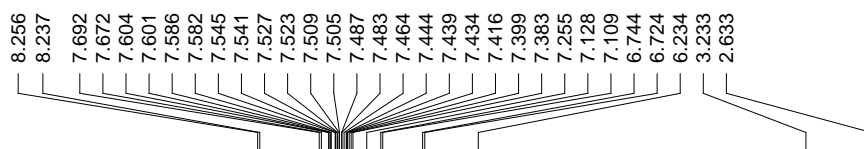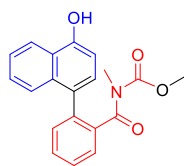

4

<sup>1</sup>H NMR (400 MHz, CDCl<sub>3</sub>)

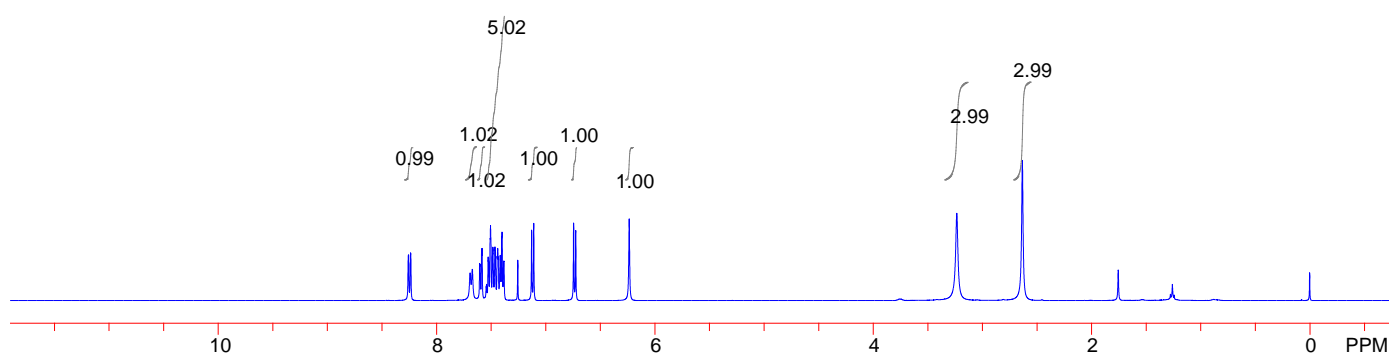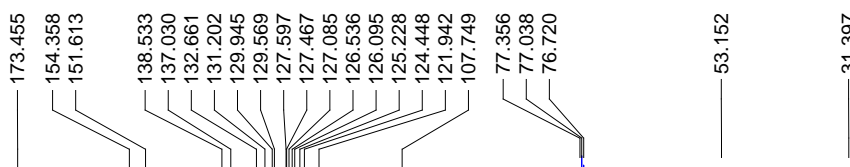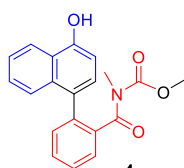

4

<sup>13</sup>C NMR (100 MHz, CDCl<sub>3</sub>)

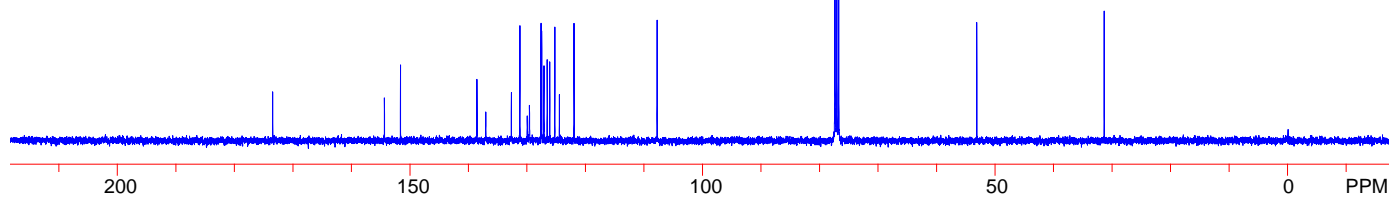

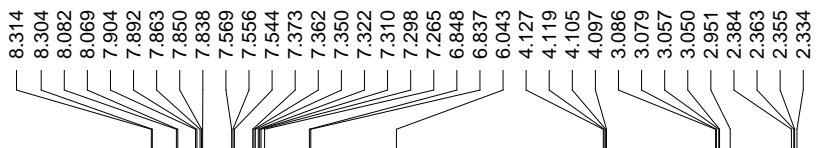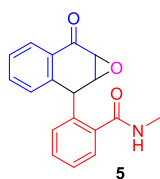

$^1\text{H}$  NMR (600 MHz,  $\text{CDCl}_3$ )

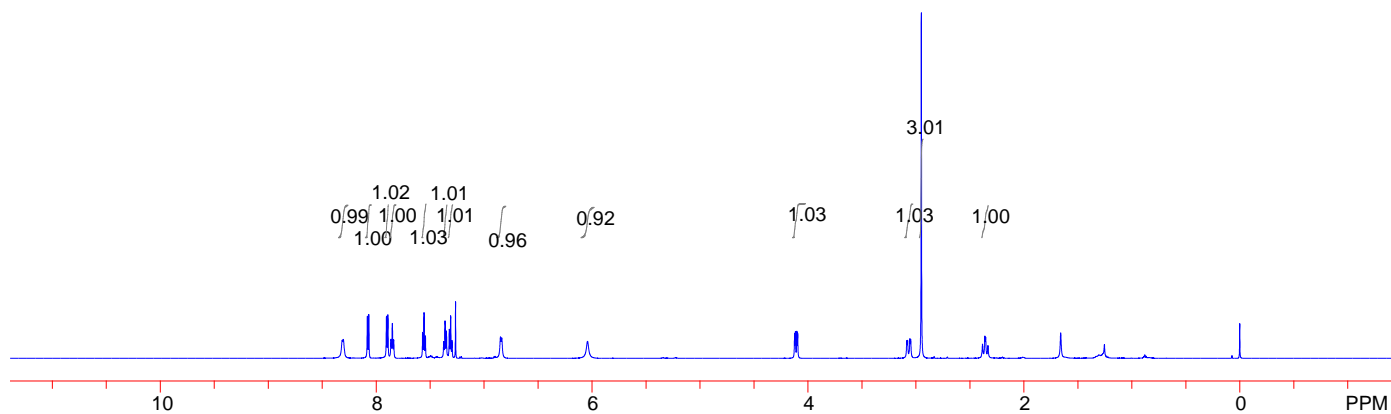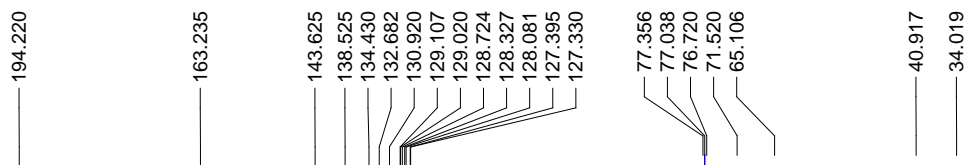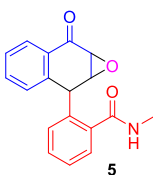

$^{13}\text{C}$  NMR (100 MHz,  $\text{CDCl}_3$ )

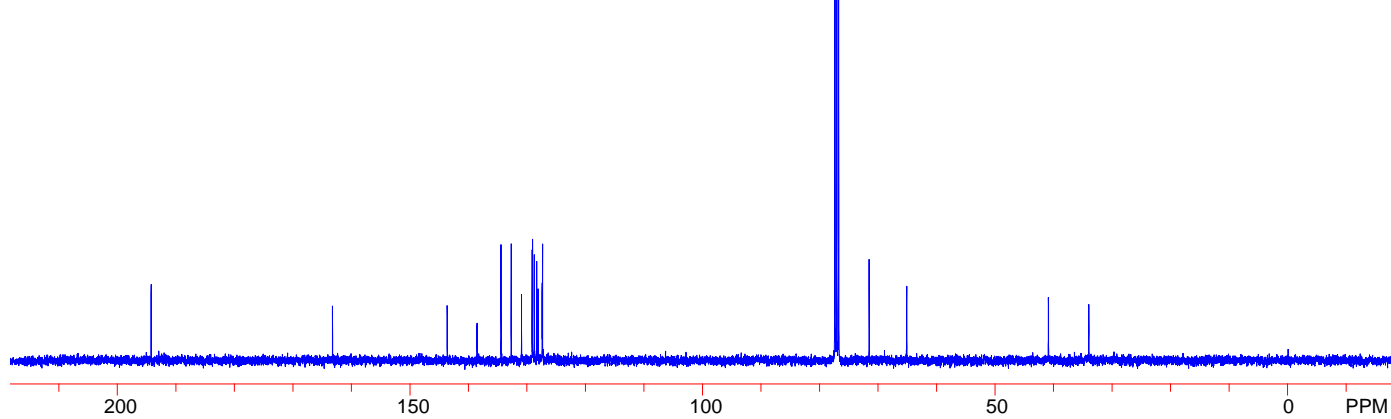

8.414  
8.407  
8.403  
8.399  
8.390  
8.273  
8.253  
7.687  
7.684  
7.667  
7.663  
7.558  
7.548  
7.539  
7.534  
7.525  
7.514  
7.457  
7.439  
7.347  
7.329  
7.310  
7.283  
7.271  
7.266  
7.260  
7.247  
7.088  
7.047  
6.960  
6.947  
6.942  
6.937  
6.934  
6.927  
6.918  
6.906  
6.821  
6.818  
6.793  
6.768  
6.683  
6.658  
3.467

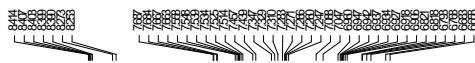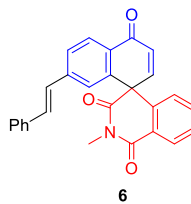

<sup>1</sup>H NMR (400 MHz, CDCl<sub>3</sub>)

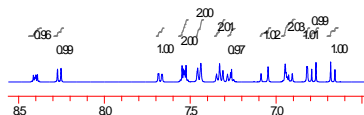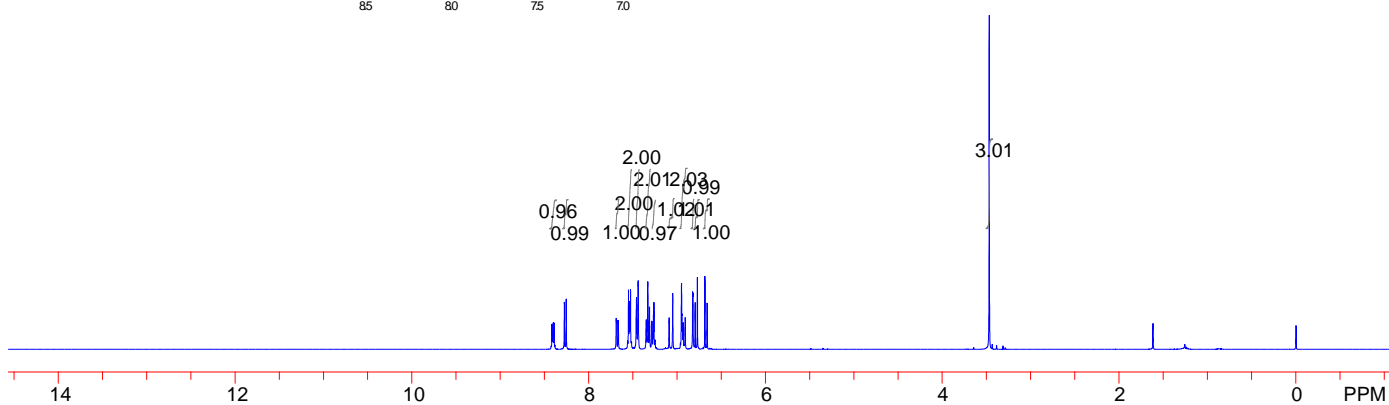

183.538  
169.865  
164.044  
144.932  
143.444  
142.469  
138.807  
136.286  
134.806  
132.343  
130.494  
129.706  
129.504  
128.948  
128.796  
128.580  
128.349  
127.764  
126.897  
126.846  
126.456  
125.806  
124.419  
77.370  
77.052  
76.735  
54.395  
28.133

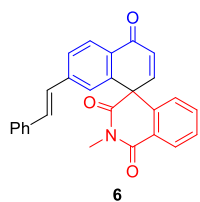

<sup>13</sup>C NMR (100 MHz, CDCl<sub>3</sub>)

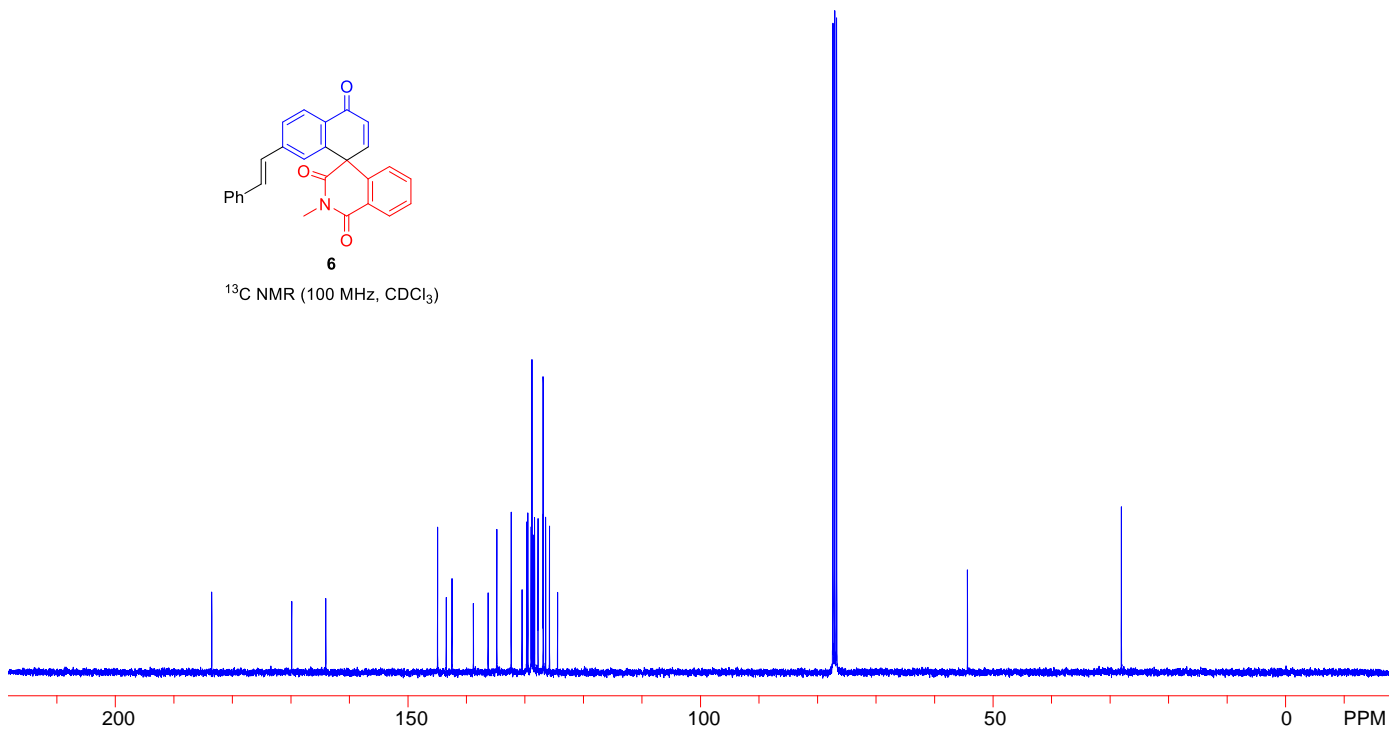

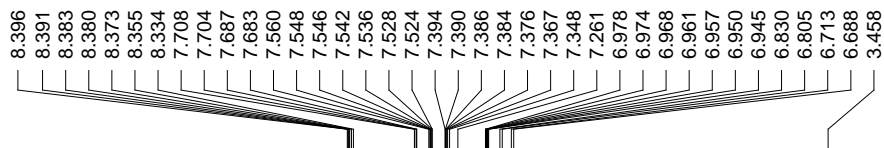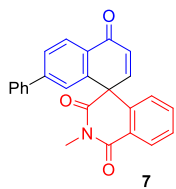

<sup>1</sup>H NMR (400 MHz, CDCl<sub>3</sub>)

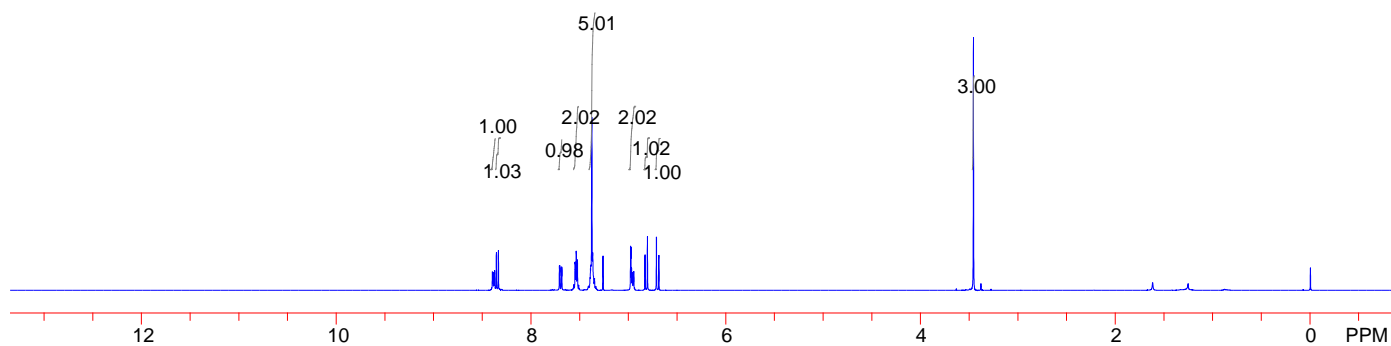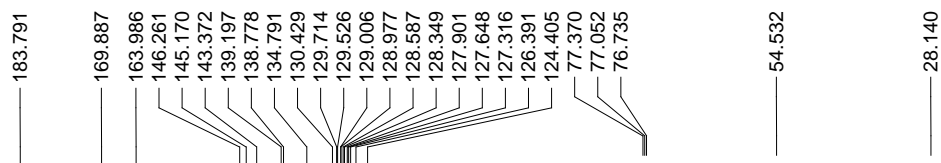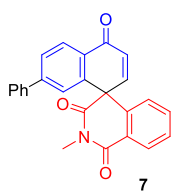

<sup>13</sup>C NMR (100 MHz, CDCl<sub>3</sub>)

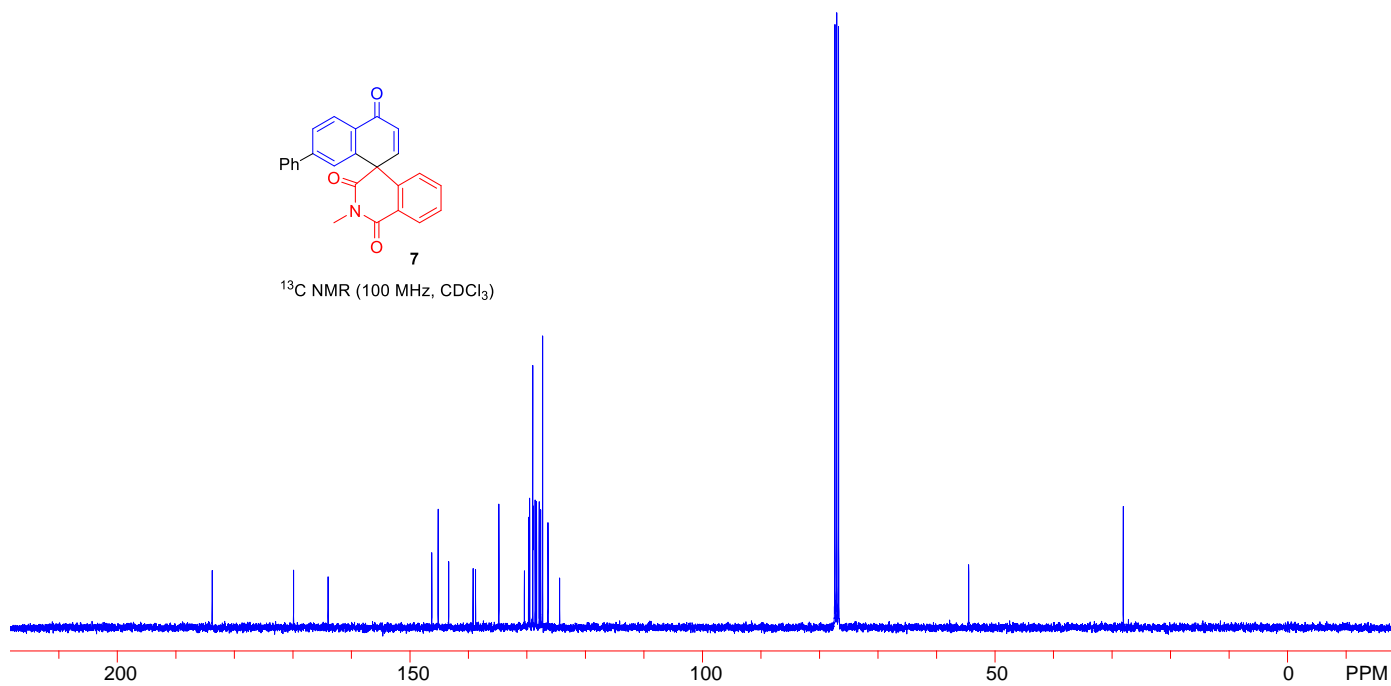

## VIII. References

- (1) W. Wu, X. Wu, S. Fan and J. Zhu, Rh(III)-Catalyzed Enaminone-Directed C–H Coupling with Diazodicarbonyls for Skeleton-Divergent Synthesis of Isocoumarins and Naphthalenes, *Org. Lett.*, 2022, **24**, 7850-7855.
- (2) F. Wang, R. Fu, J. Chen, J. Rong, E. Wng, J. Zhang, Z. Zhang and Y. Jiang, Metal-Free Synthesis of *gem*-Difluorinated Heterocycles from Enaminones and Difluorocarbene Precursors, *Chem. Commun.*, 2022, **58**, 3477-3480.
- (3) M. Wang, Q. Zhou, X. Zhang and X. Fan, Condition-Controlled Divergent Synthesis of Imidazoindolone Spiroisoquinolinones from *N*-Alkoxy-carboxamide Indoles and Diazo Homophthalimides, *Adv. Synth. Catal.*, 2023, **365**, 1255-1261.
- (4) Q. Zhou, X. Song, X. Zhang and X. Fan, Synthesis of Spiro[benzo[*d*][1,3]oxazine-4,4'-isoquinoline]s via [4 + 1 + 1] Annulation of *N*-Aryl Amidines with Diazo Homophthalimides and O<sub>2</sub>, *Org. Lett.*, 2022, **24**, 1280-1285.
- (5) R. L. Betts, S. T. Murphy and C. R. Johnson, Enzymatic Desymmetrization/Resolution of Epoxydiols Derived from 1,4-Naphthoquinone, 5-Hydroxy-1,4-naphthoquinone and 5,8-Dihydroxy-1,4-naphthoquinone, *Tetrahedron*, 2004, **15**, 2853-2860.
- (6) X. Song, Q. Zhou, J. Zhao, Y. Jiang, X. Zhang, X. Zhang and X. Fan, Synthesis of 1,3-Benzodiazepines through [5 + 2] Annulation of *N*-Aryl Amidines with Propargylic Esters, *Org. Lett.*, 2020, **22**, 9506-9512.
- (7) L. Zhou, Y. Shi, X. Zhu and P. Zhang, Pd-Catalyzed Intramolecular Heck Reaction for the Synthesis of 2-Methylbenzofurans, *Tetrahedron Lett.*, 2019, **60**, 2005-2008.
